# Supplementary material for: Isolation and characterization of novel degradation products in fenoverine by LC-QTOF-MS/MS, LC-MSn and 2D-NMR
Source: Royal Society of Chemistry journal article supplement (doi:10.1039/d3nj05623f), 2024-01-01
Supplement: d3nj05623f1.pdf [file d3nj05623f1.pdf]

**Isolation and characterization of novel degradation products in Fenoverine by LC-QTOF-MS/MS, LC-MS<sup>n</sup>  
and 2D-NMR**

***Ch Krishnam Raju<sup>1,2</sup>, J V Shanmukha Kumar\*<sup>1</sup>, Kada Yesudas,<sup>3</sup> Sanath Kumar Goud<sup>2</sup>***

*<sup>1</sup>Department of Chemistry, Koneru Lakshmaiah Education Foundation, Green Fields, Vaddeswaram, A.P.-522302, India.*

*<sup>2</sup>Analytical Research and Development, United States Pharmacopeial Convention – India (P) Ltd., Plot No. D6 & D8, IKP, Genome Valley, Shameerpet, Hyderabad, Telangana-500101, India.*

*<sup>3</sup>Synthetics Department, United States Pharmacopeial Convention – India (P) Ltd., Plot No. D6 & D8, IKP, Genome Valley, Shameerpet, Hyderabad, Telangana-500101, India.*

**List of figures:**

|                                                                                    |      |
|------------------------------------------------------------------------------------|------|
| 1. UV Spectra of FEN                                                               | S-7  |
| 2. UV Spectra of FAD1                                                              | S-7  |
| 3. UV Spectra of FAD2                                                              | S-8  |
| 4. UV Spectra of FOD1                                                              | S-8  |
| 5. UV Spectra of FOD2                                                              | S-9  |
| 6. UV Spectra of FOD3                                                              | S-9  |
| 7. UV Spectra of FOD4                                                              | S-10 |
| 8. UV Spectra of FOD5                                                              | S-10 |
| 9. Mass chromatograms of FEN and its degradation products FAD1, FAD2, FOD1 to FOD5 | S-11 |
| 10. High resolution mass Spectrum of FEN                                           | S-12 |
| 11. High resolution MSMS Spectrum of FEN                                           | S-13 |
| 12. MS <sup>n</sup> spectrum of FEN                                                | S-14 |
| 13. High resolution mass Spectrum of FAD1                                          | S-15 |
| 14. High resolution MSMS Spectrum of FAD1                                          | S-16 |
| 15. MS <sup>n</sup> spectrum of FAD1                                               | S-17 |
| 16. High resolution mass Spectrum of FAD2                                          | S-18 |
| 17. High resolution MSMS Spectrum of FAD2                                          | S-19 |
| 18. MS <sup>n</sup> spectrum of FAD2                                               | S-20 |

|                                                                                       |      |
|---------------------------------------------------------------------------------------|------|
| 19. High resolution mass Spectrum of FOD1                                             | S-21 |
| 20. High resolution MSMS Spectrum of FOD1                                             | S-22 |
| 21. MS <sup>n</sup> spectrum of FOD1                                                  | S-23 |
| 22. High resolution mass Spectrum of FOD2                                             | S-24 |
| 23. High resolution MSMS Spectrum of FOD2                                             | S-25 |
| 24. MS <sup>n</sup> spectrum of FOD2                                                  | S-26 |
| 25. High resolution mass Spectrum of FOD3                                             | S-27 |
| 26. High resolution MSMS Spectrum of FOD3                                             | S-28 |
| 27. MS <sup>n</sup> spectrum of FOD3                                                  | S-29 |
| 28. High resolution mass Spectrum of FOD4                                             | S-30 |
| 29. High resolution MSMS Spectrum of FOD4                                             | S-31 |
| 30. MS <sup>n</sup> spectrum of FOD4                                                  | S-32 |
| 31. High resolution mass Spectrum of FOD5                                             | S-33 |
| 32. High resolution MSMS Spectrum of FOD5                                             | S-34 |
| 33. MS <sup>n</sup> spectrum of FOD5                                                  | S-35 |
| 34. <sup>1</sup> H NMR Spectrum of FEN (500 MHz, DMSO- <i>d</i> <sub>6</sub> , 300K)  | S-36 |
| 35. <sup>13</sup> C NMR Spectrum of FEN (126 MHz, DMSO- <i>d</i> <sub>6</sub> , 300K) | S-37 |
| 36. DEPT135 NMR Spectrum of FEN (126 MHz, DMSO- <i>d</i> <sub>6</sub> , 300K)         | S-38 |
| 37. COSY NMR Spectrum of FEN (500 MHz, DMSO- <i>d</i> <sub>6</sub> , 300K)            | S-39 |

|                                                                                       |      |
|---------------------------------------------------------------------------------------|------|
| 38. TOCSY NMR Spectrum of FEN (500 MHz, DMSO-d <sub>6</sub> , 300K)                   | S-40 |
| 39. HSQC NMR Spectrum of FEN (500 MHz, DMSO-d <sub>6</sub> , 300K)                    | S-41 |
| 40. HMBC NMR Spectrum of FEN (500 MHz, DMSO-d <sub>6</sub> , 300K)                    | S-42 |
| 41. <sup>15</sup> N-HMBC NMR Spectrum of FEN (500 MHz, DMSO-d <sub>6</sub> , 300K)    | S-43 |
| 42. <sup>1</sup> H NMR Spectrum of FAD1 (500 MHz, DMSO- <i>d</i> <sub>6</sub> , 300K) | S-44 |
| 43. <sup>13</sup> C NMR Spectrum of FAD1 (126 MHz, DMSO-d <sub>6</sub> , 300K)        | S-45 |
| 44. DEPT135 NMR Spectrum of CD1 (126 MHz, DMSO-d <sub>6</sub> , 300K)                 | S-46 |
| 45. COSY NMR Spectrum of FAD1 (500 MHz, DMSO-d <sub>6</sub> , 300K)                   | S-47 |
| 46. TOCSY NMR Spectrum of FAD1 (500 MHz, DMSO-d <sub>6</sub> , 300K)                  | S-48 |
| 47. HSQC NMR Spectrum of FAD1 (500 MHz, DMSO-d <sub>6</sub> , 300K)                   | S-49 |
| 48. HMBC NMR Spectrum of FAD1 (500 MHz, DMSO-d <sub>6</sub> , 300K)                   | S-50 |
| 49. <sup>1</sup> H NMR Spectrum of FAD2 (500 MHz, DMSO- <i>d</i> <sub>6</sub> , 300K) | S-51 |
| 50. <sup>13</sup> C NMR Spectrum of FAD2 (126 MHz, DMSO-d <sub>6</sub> , 300K)        | S-52 |
| 51. DEPT90 NMR Spectrum of FAD2 (126 MHz, DMSO-d <sub>6</sub> , 300K)                 | S-53 |
| 52. COSY NMR Spectrum of FAD2 (500 MHz, DMSO-d <sub>6</sub> , 300K)                   | S-54 |
| 53. HSQC NMR Spectrum of FAD2 (500 MHz, DMSO-d <sub>6</sub> , 300K)                   | S-55 |
| 54. HMBC NMR Spectrum of FAD2 (500 MHz, DMSO-d <sub>6</sub> , 300K)                   | S-56 |
| 55. <sup>15</sup> N-HMBC NMR Spectrum of FAD2 (500 MHz, DMSO-d <sub>6</sub> , 300K)   | S-57 |
| 56. <sup>1</sup> H NMR Spectrum of FOD1 (500 MHz, DMSO- <i>d</i> <sub>6</sub> , 300K) | S-58 |

|                                                                                              |      |
|----------------------------------------------------------------------------------------------|------|
| 57. $^{13}\text{C}$ NMR Spectrum of FOD1 (126 MHz, DMSO- <i>d</i> <sub>6</sub> , 300K)       | S-59 |
| 58. DEPT90 NMR Spectrum of FOD1 (126 MHz, DMSO- <i>d</i> <sub>6</sub> , 300K)                | S-60 |
| 59. COSY NMR Spectrum of FOD1 (500 MHz, DMSO- <i>d</i> <sub>6</sub> , 300K)                  | S-61 |
| 60. TOCSY NMR Spectrum of FOD1 (500 MHz, DMSO- <i>d</i> <sub>6</sub> , 300K)                 | S-62 |
| 61. HSQC NMR Spectrum of FOD1 (500 MHz, DMSO- <i>d</i> <sub>6</sub> , 300K)                  | S-63 |
| 62. HMBC NMR Spectrum of FOD1 (500 MHz, DMSO- <i>d</i> <sub>6</sub> , 300K)                  | S-64 |
| 63. $^{15}\text{N}$ -HMBC NMR Spectrum of FOD1 (500 MHz, DMSO- <i>d</i> <sub>6</sub> , 300K) | S-65 |
| 64. $^1\text{H}$ NMR Spectrum of FOD2 (500 MHz, DMSO- <i>d</i> <sub>6</sub> , 300K)          | S-66 |
| 65. $^{13}\text{C}$ NMR Spectrum of FOD2 (126 MHz, DMSO- <i>d</i> <sub>6</sub> , 300K)       | S-67 |
| 66. DEPT135 NMR Spectrum of FOD2 (126 MHz, DMSO- <i>d</i> <sub>6</sub> , 300K)               | S-68 |
| 67. COSY NMR Spectrum of FOD2 (500 MHz, DMSO- <i>d</i> <sub>6</sub> , 300K)                  | S-69 |
| 68. TOCSY NMR Spectrum of FOD2 (500 MHz, DMSO- <i>d</i> <sub>6</sub> , 300K)                 | S-70 |
| 69. HSQC NMR Spectrum of FOD2 (500 MHz, DMSO- <i>d</i> <sub>6</sub> , 300K)                  | S-71 |
| 70. HMBC NMR Spectrum of FOD2 (500 MHz, DMSO- <i>d</i> <sub>6</sub> , 300K)                  | S-72 |
| 71. $^{15}\text{N}$ -HMBC NMR Spectrum of FOD2 (500 MHz, DMSO- <i>d</i> <sub>6</sub> , 300K) | S-73 |
| 72. $^1\text{H}$ NMR Spectrum of FOD3 (500 MHz, DMSO- <i>d</i> <sub>6</sub> , 300K)          | S-74 |
| 73. $^{13}\text{C}$ NMR Spectrum of FOD3 (126 MHz, DMSO- <i>d</i> <sub>6</sub> , 300K)       | S-75 |
| 74. DEPT135 NMR Spectrum of FOD3 (126 MHz, DMSO- <i>d</i> <sub>6</sub> , 300K)               | S-76 |
| 75. COSY NMR Spectrum of FOD3 (500 MHz, DMSO- <i>d</i> <sub>6</sub> , 300K)                  | S-77 |

|                                                                           |      |
|---------------------------------------------------------------------------|------|
| 76. TOCSY NMR Spectrum of FOD3 (500 MHz, DMSO-d6, 300K)                   | S-78 |
| 77. HSQC NMR Spectrum of FOD3 (500 MHz, DMSO-d6, 300K)                    | S-79 |
| 78. HMBC NMR Spectrum of FOD3 (500 MHz, DMSO-d6, 300K)                    | S-80 |
| 79. <sup>15</sup> N-HMBC NMR Spectrum of FOD3 (500 MHz, DMSO-d6, 300K)    | S-81 |
| 80. <sup>1</sup> H NMR Spectrum of FOD5 (500 MHz, DMSO- <i>d</i> 6, 300K) | S-82 |
| 81. <sup>13</sup> C NMR Spectrum of FOD5 (126 MHz, DMSO-d6, 300K)         | S-83 |
| 82. DEPT90 NMR Spectrum of FOD5 (126 MHz, DMSO-d6, 300K)                  | S-84 |
| 83. DEPT135 NMR Spectrum of FOD5 (126 MHz, DMSO-d6, 300K)                 | S-85 |
| 84. COSY NMR Spectrum of FOD5 (500 MHz, DMSO-d6, 300K)                    | S-86 |
| 85. TOCSY NMR Spectrum of FOD5 (500 MHz, DMSO-d6, 300K)                   | S-87 |
| 86. HSQC NMR Spectrum of FOD5 (500 MHz, DMSO-d6, 300K)                    | S-88 |
| 87. HMBC NMR Spectrum of FOD5 (500 MHz, DMSO-d6, 300K)                    | S-89 |
| 88. In-silico prediction report for FEN                                   | S-90 |
| 89. Fragment structures of FOD1 by ACD-MS Fragmentor                      | S-91 |
| 90. Fragment structures of FOD2 by ACD-MS Fragmentor                      | S-92 |

**List of Tables:**

|                                                                                                          |      |
|----------------------------------------------------------------------------------------------------------|------|
| 1. HRMS fragmentation data of Fenoverine (FEN) and its degradation products<br>FAD1, FAD2, FOD1 to FOD5. | S-93 |
|----------------------------------------------------------------------------------------------------------|------|

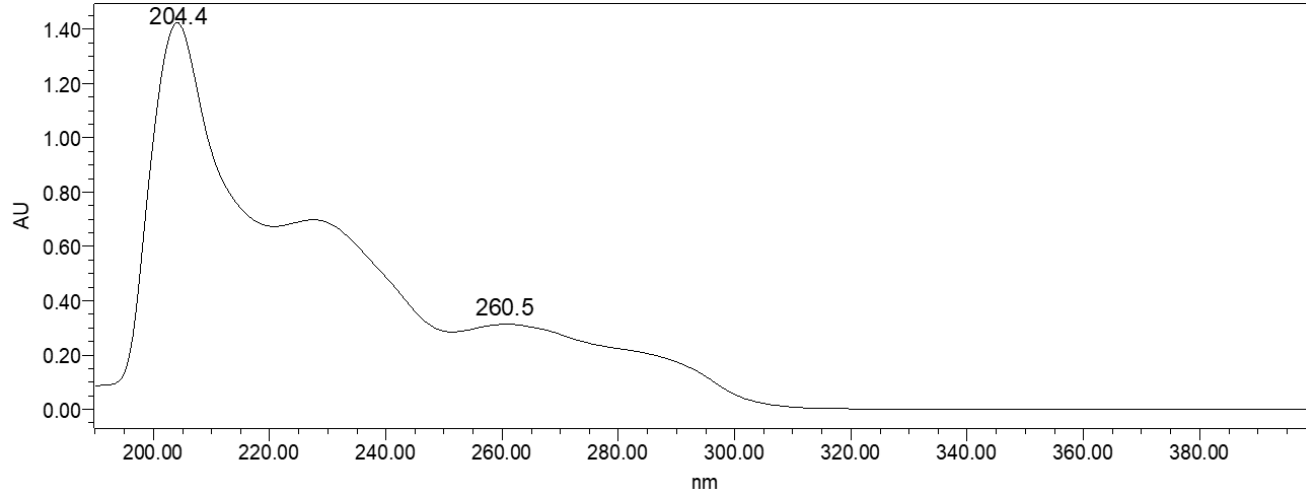

Figure 1: UV Spectra of FEN.

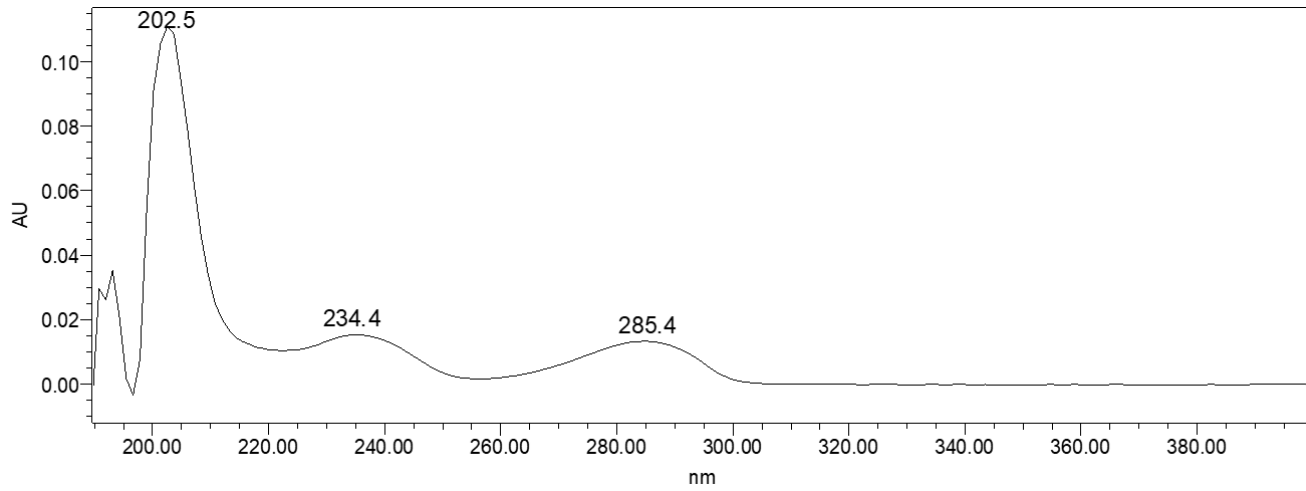

Figure 2: UV Spectra of FAD1.

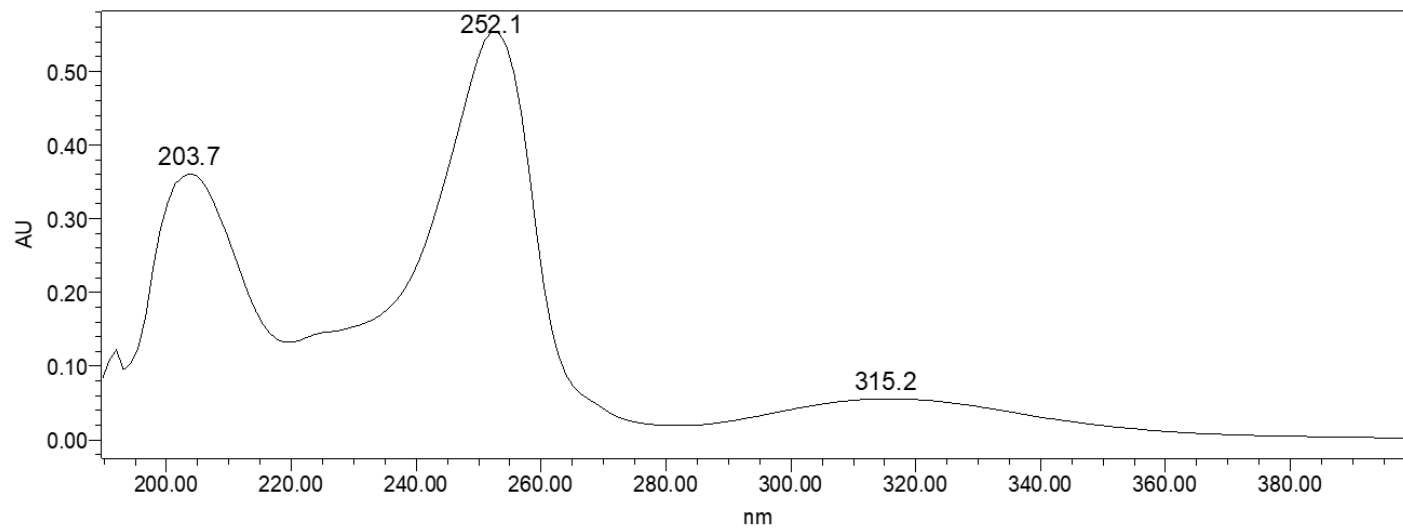

Figure 3: UV Spectra of FAD2.

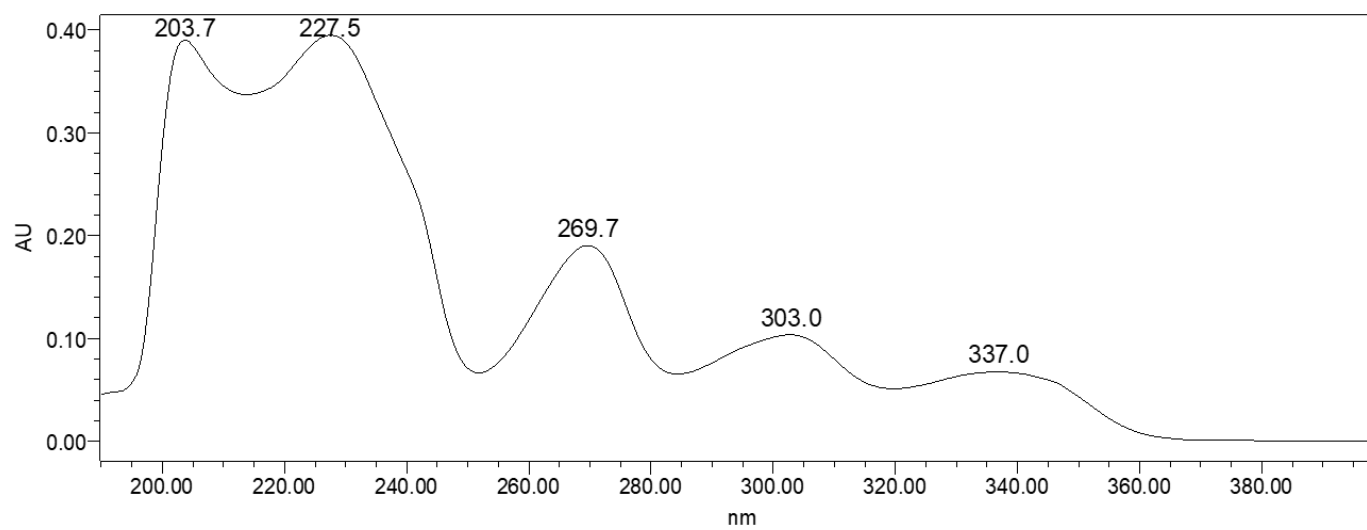

Figure 4: UV Spectra of FOD1.



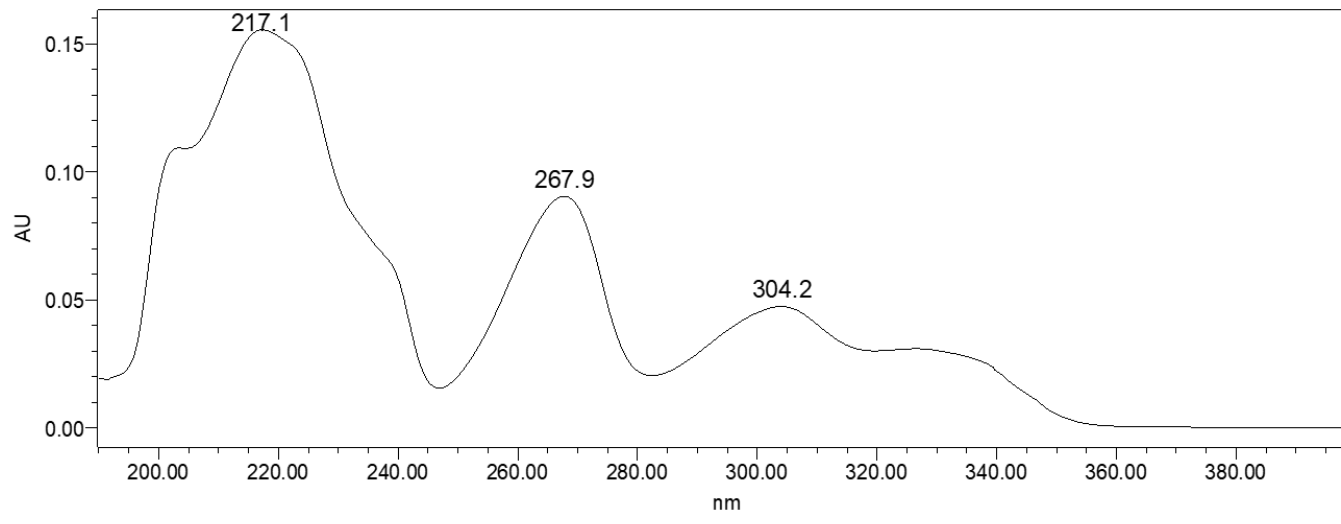

Figure 5: UV Spectra of FOD2.

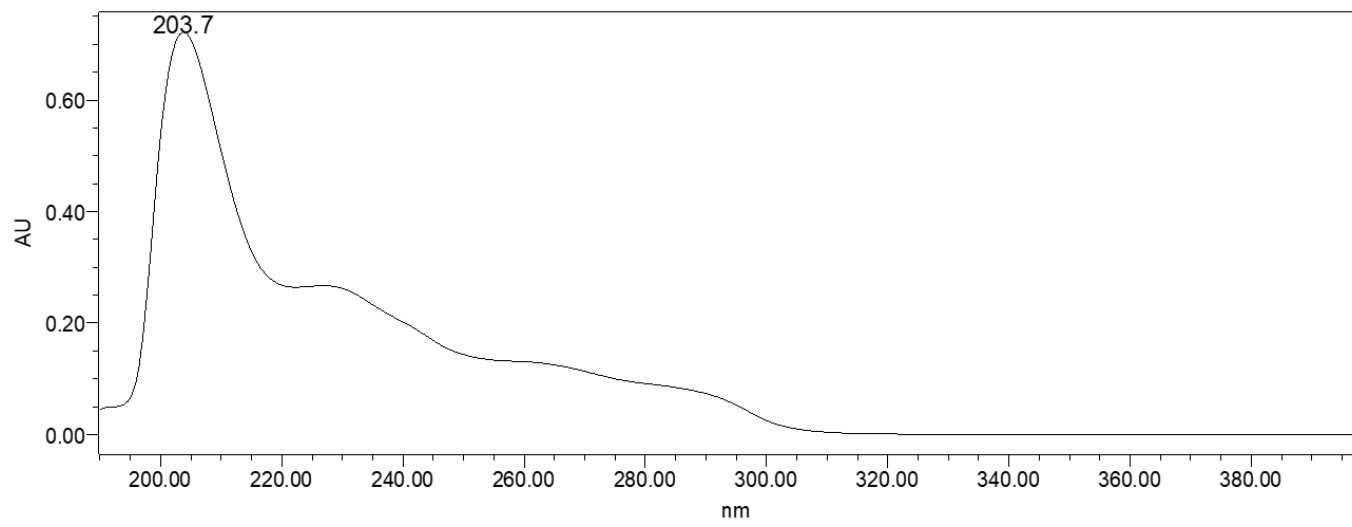

Figure 6: UV Spectra of FOD3.

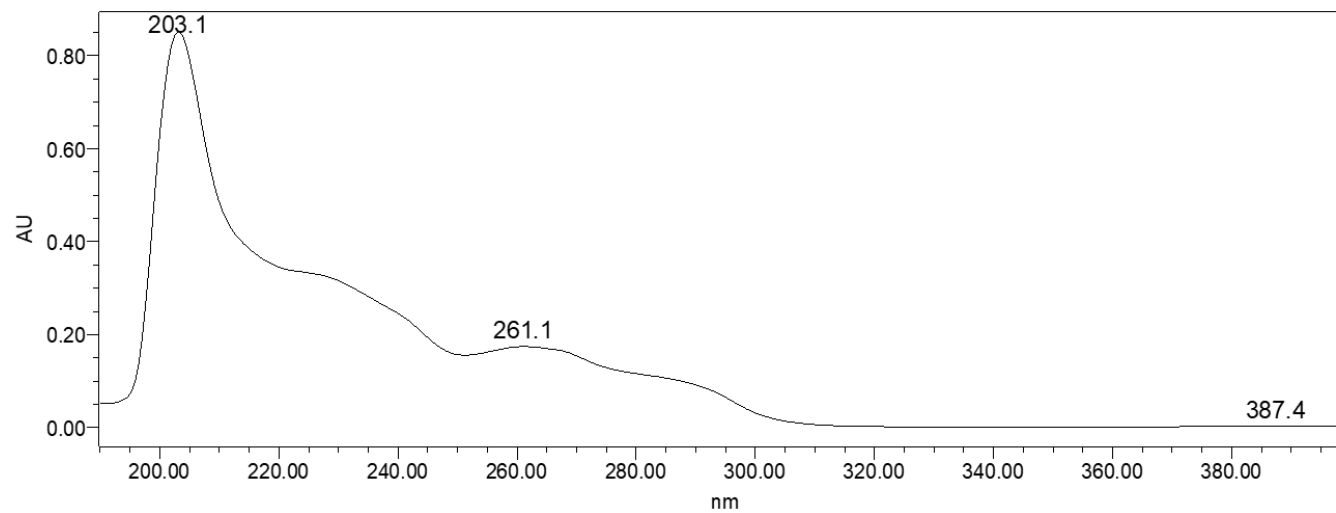

Figure 7: UV Spectra of FOD4

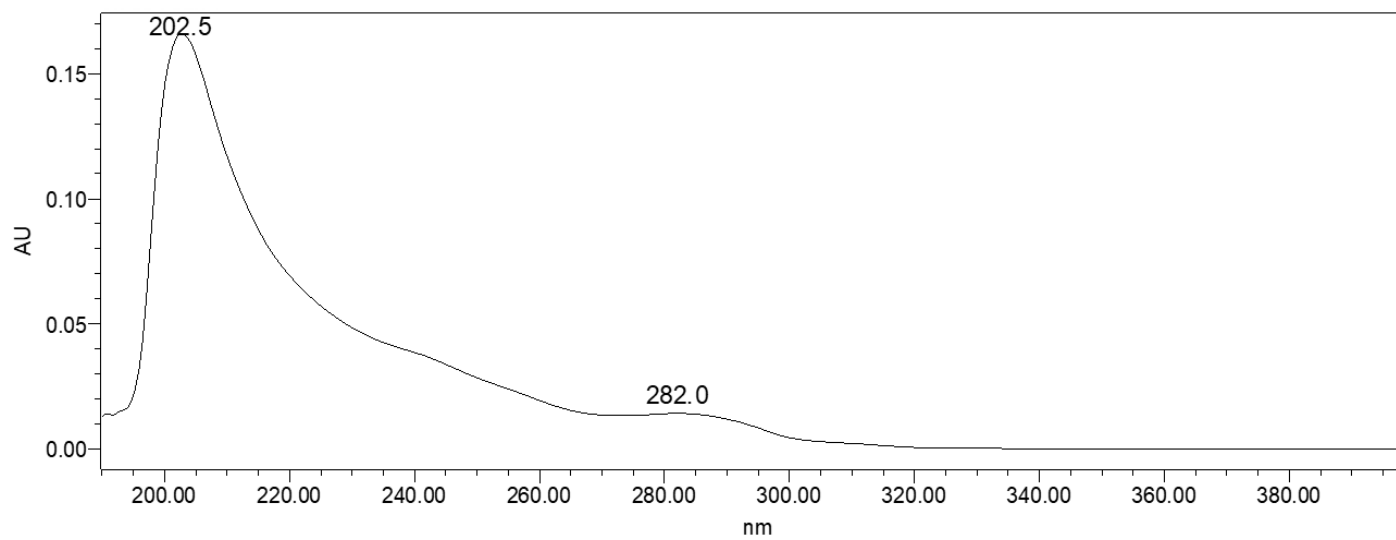

Figure 8: UV Spectra of FOD5

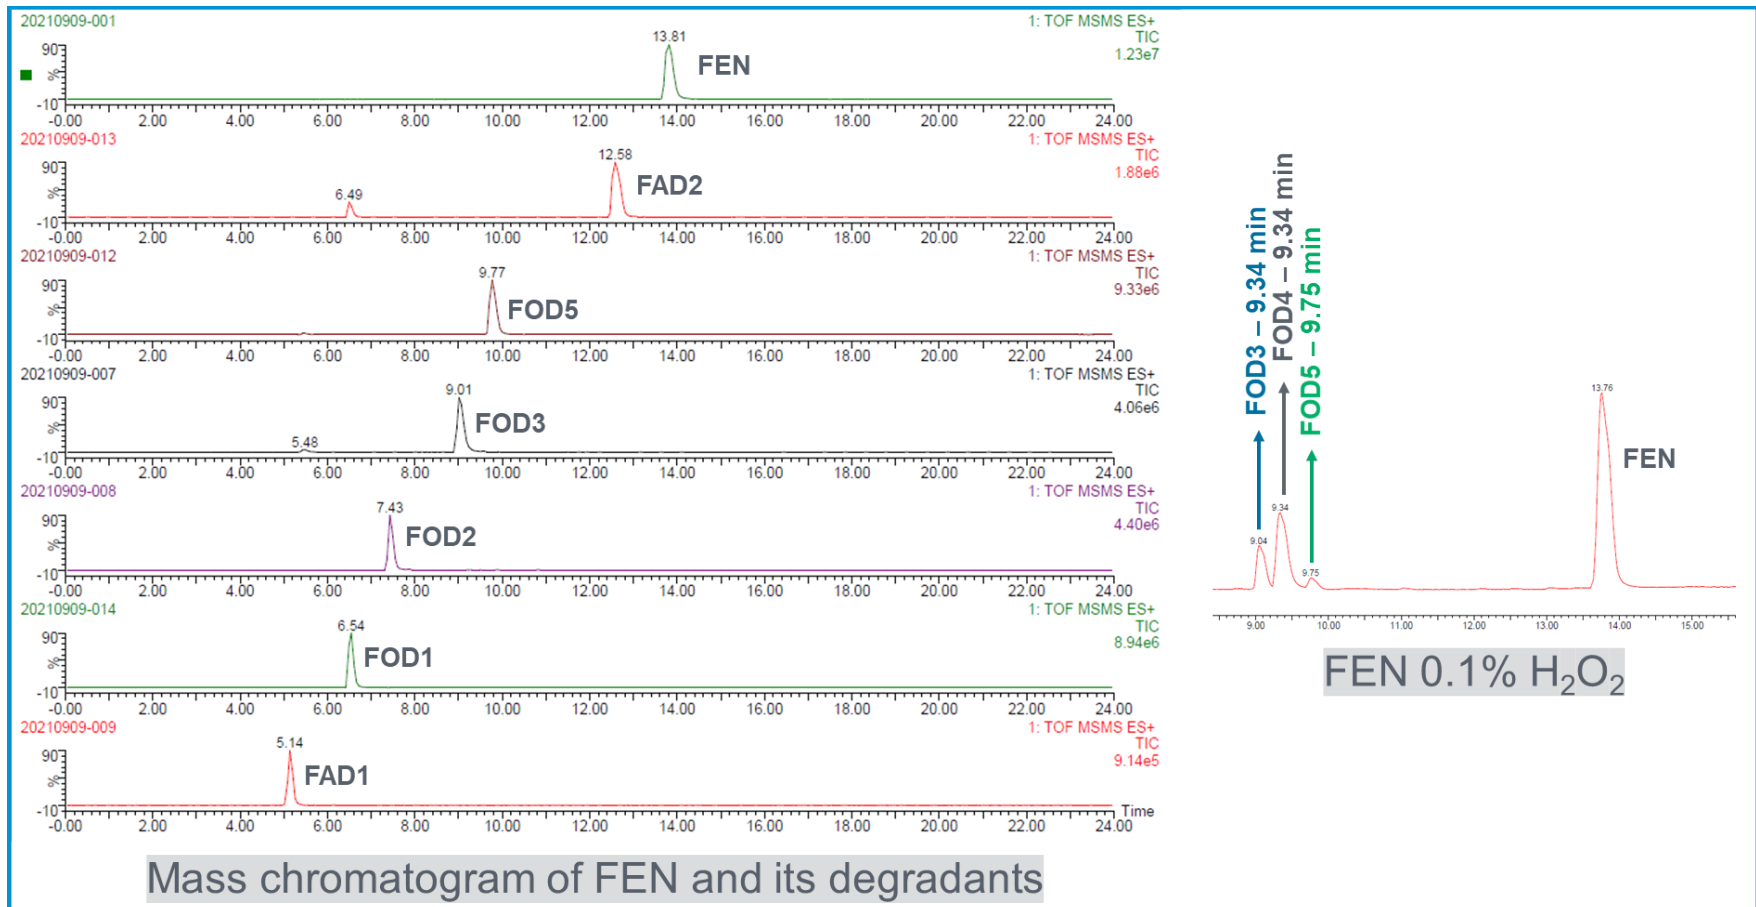

Figure 9: Mass chromatograms of FEN and its degradation products FAD1, FAD2, FOD1 to FOD5

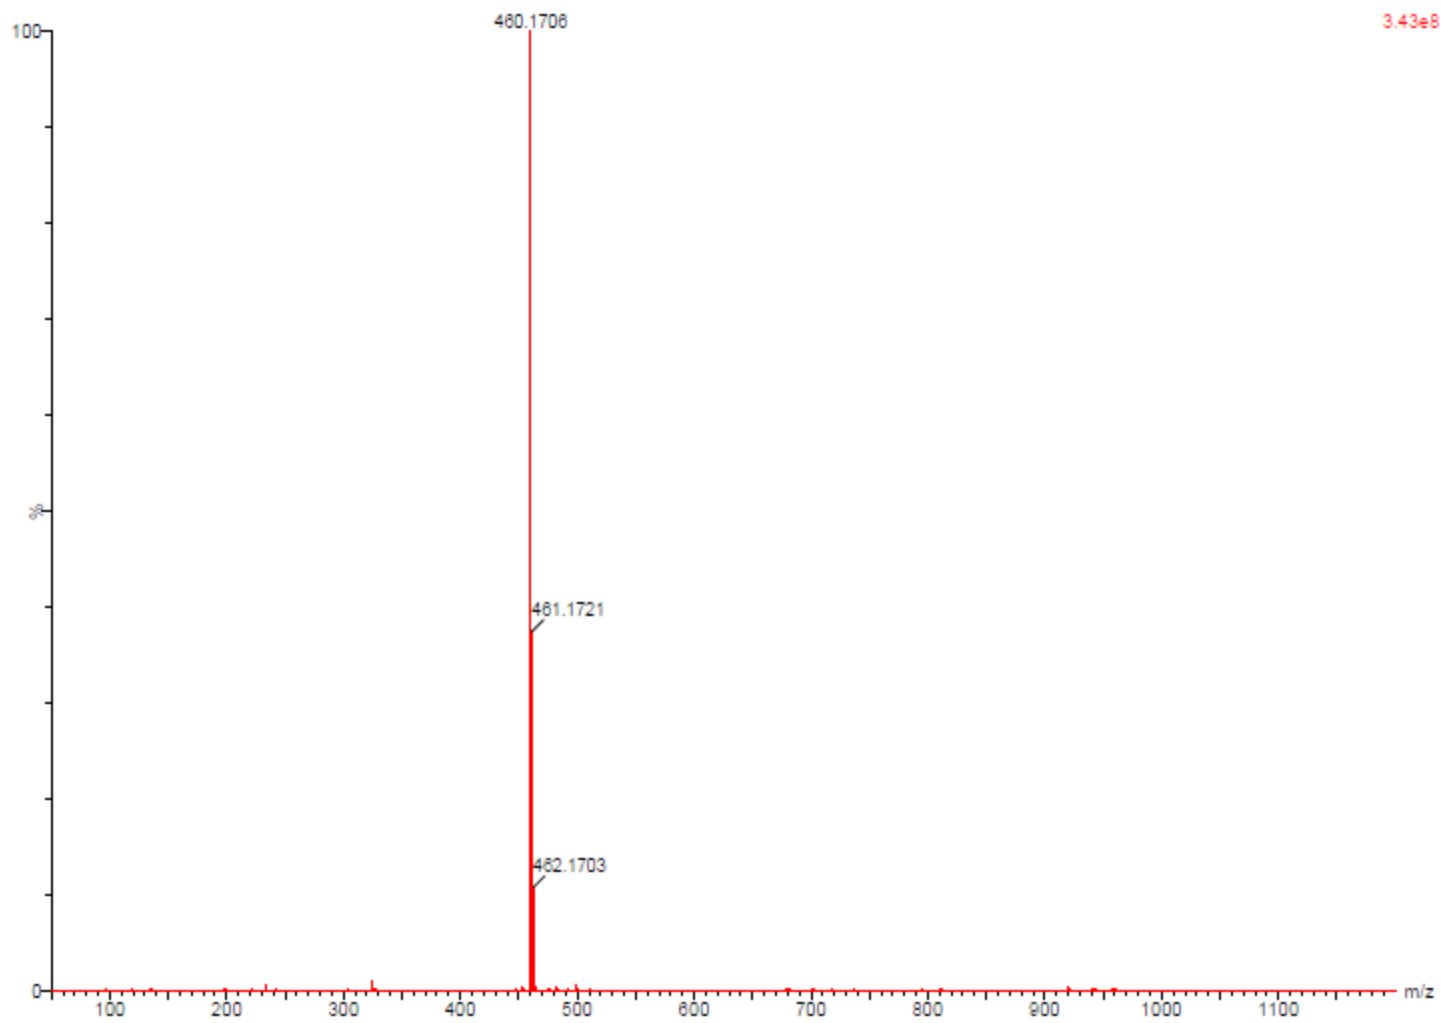

Figure 10: High resolution mass spectrum of FEN

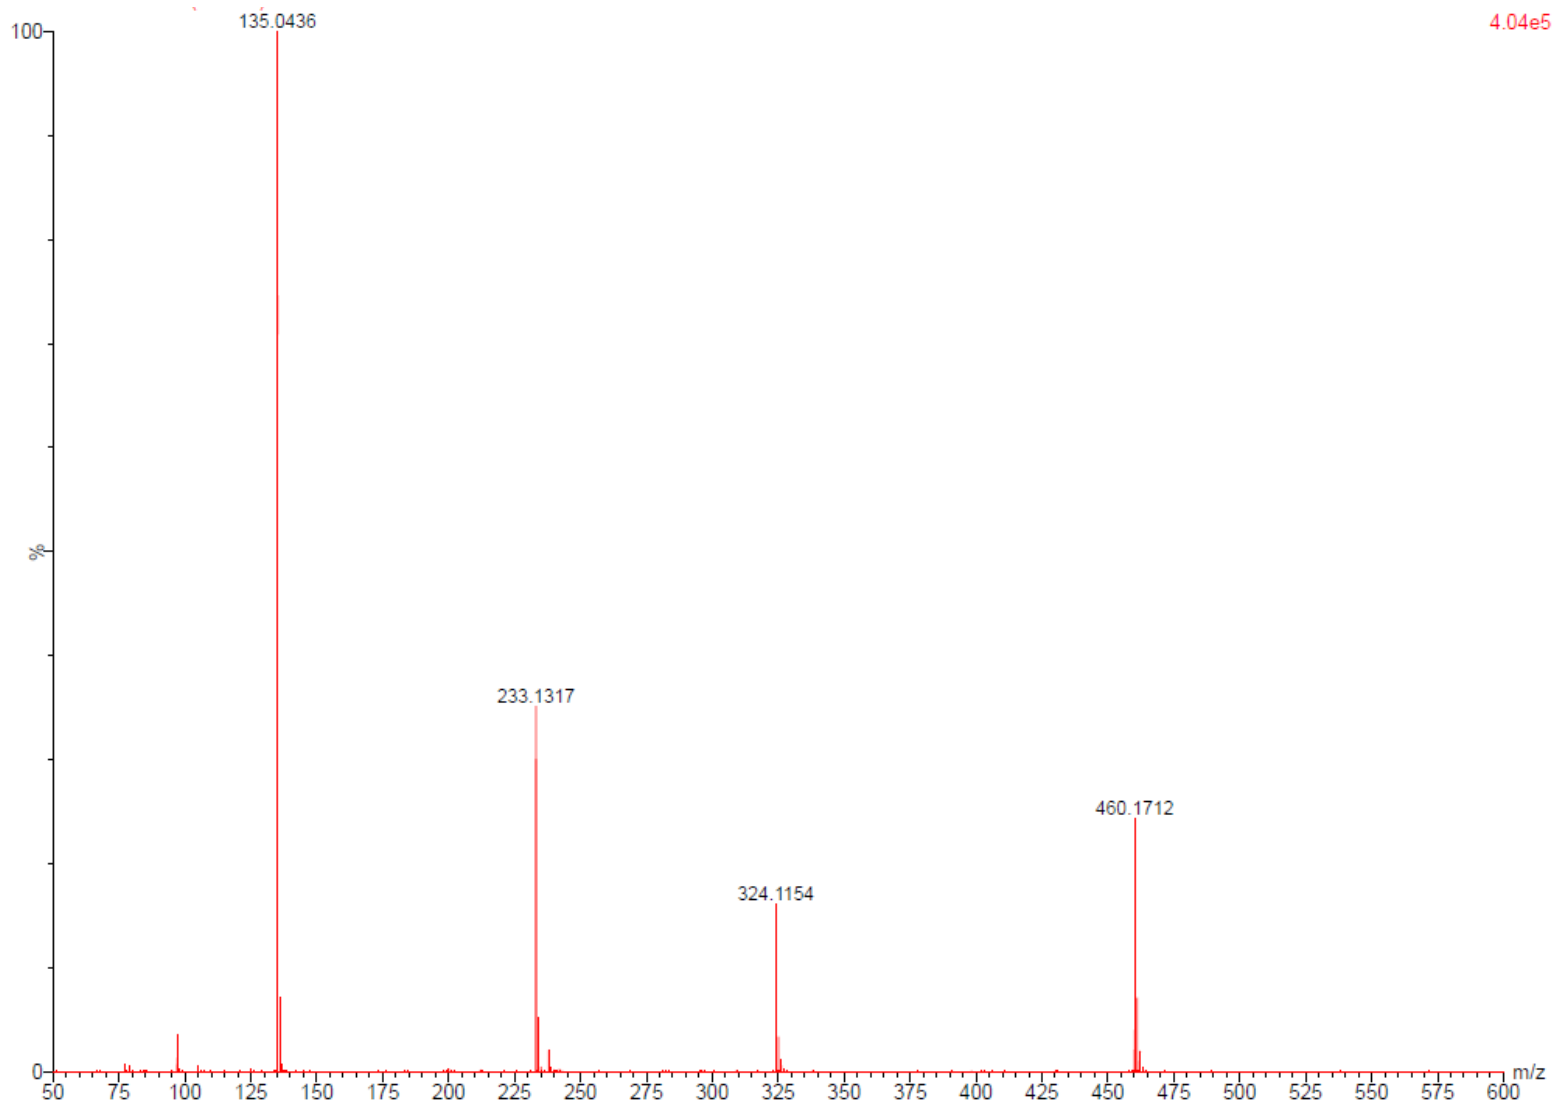

Figure 11: High resolution MSMS Spectrum of FEN

FEN-13-11 #296 RT: 1.13 AV: 1 NL: 2.01E6  
F: ITMS + p ESI Full ms [450.00-500.00]

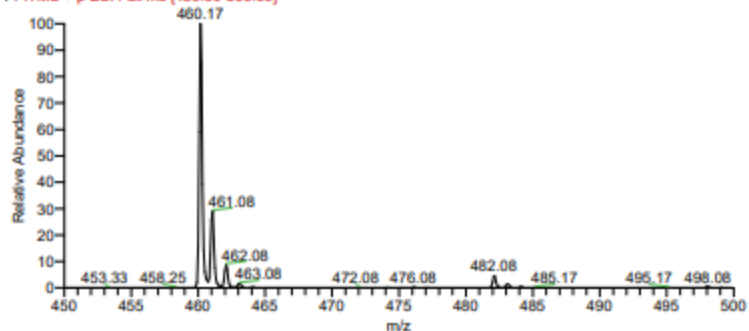

FEN-13-11 #97-538 RT: 0.37-1.85 AV: 4 NL: 5.29E3  
T: ITMS + c ESI d Full ms4 460.21@cid60.00 324.11@cid60.00 237.97@cid60.00 [55.00-250.00]

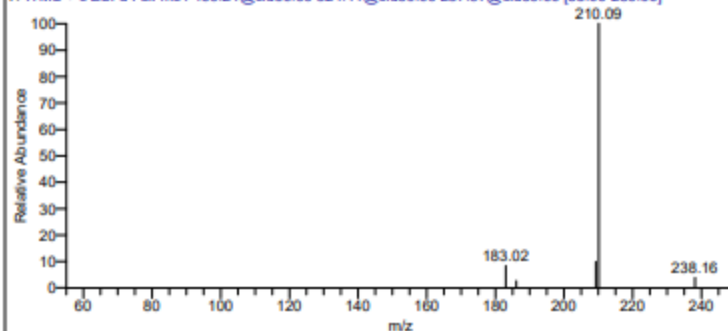

FEN-13-11 #3-507 RT: 0.02-1.77 AV: 14 NL: 2.98E5  
T: ITMS + c ESI d Full ms2 460.21@cid60.00 [115.00-475.00]

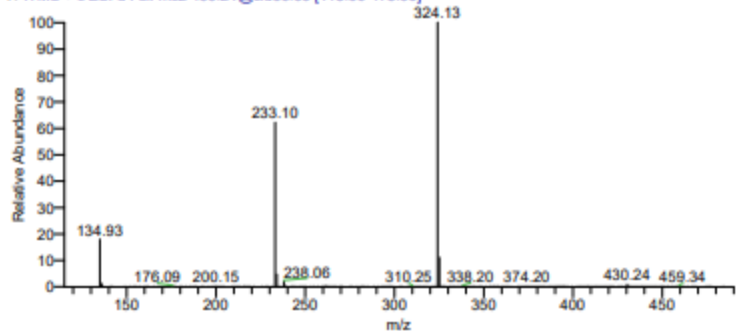

FEN-13-11 #72-513 RT: 0.30-1.78 AV: 4 NL: 5.62E5  
T: ITMS + c ESI d Full ms3 460.21@cid60.00 233.09@cid60.00 [50.00-245.00]

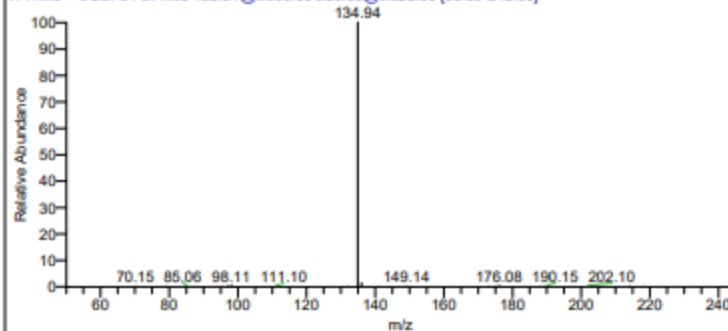

FEN-13-11 #71-512 RT: 0.30-1.78 AV: 4 NL: 1.62E5  
T: ITMS + c ESI d Full ms3 460.21@cid60.00 324.11@cid60.00 [75.00-335.00]

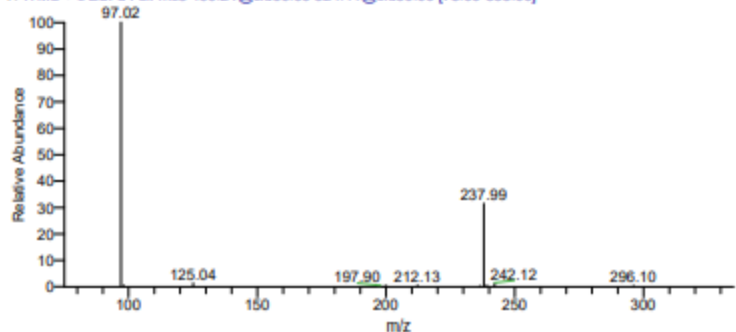

FEN-13-11 #73-514 RT: 0.30-1.78 AV: 4 NL: 2.18E2  
T: Average spectrum MS3 460.29,134.94 (73-514)

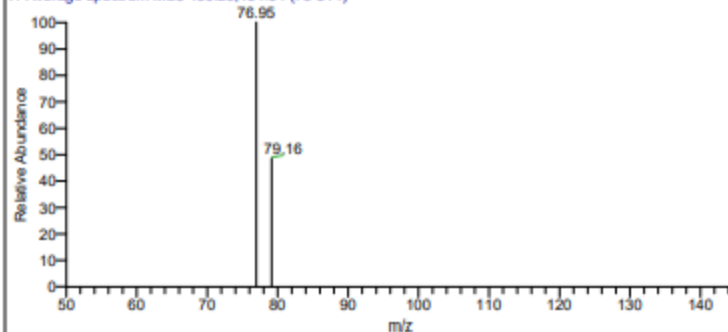

Figure 12: MS<sup>n</sup> spectrum of FEN

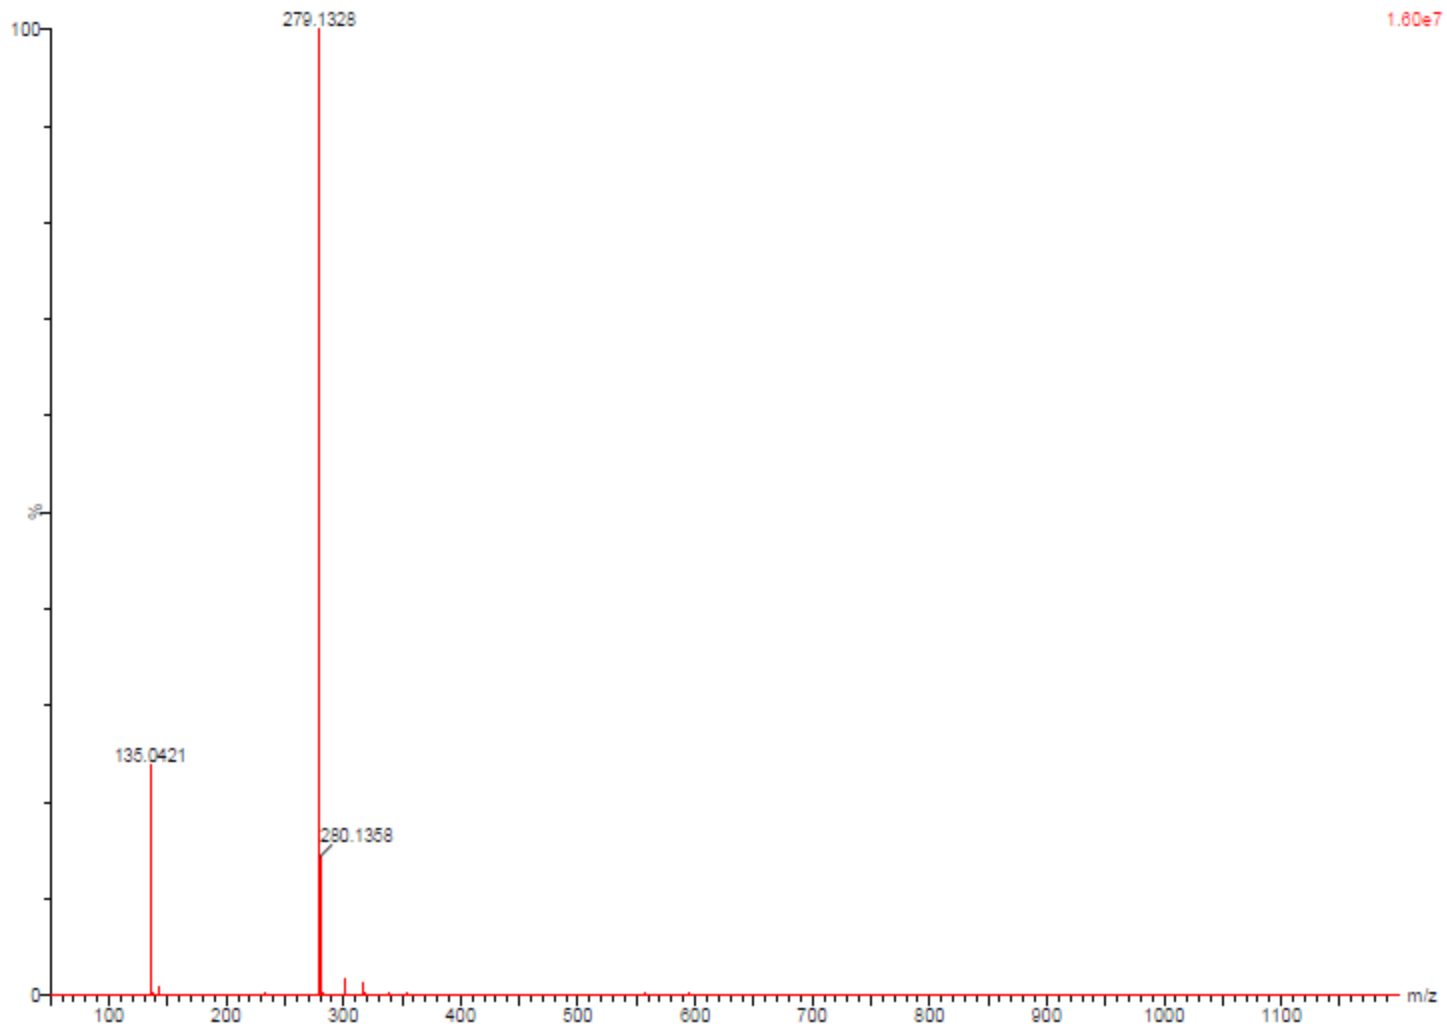

Figure 13: High resolution mass spectrum of FAD1

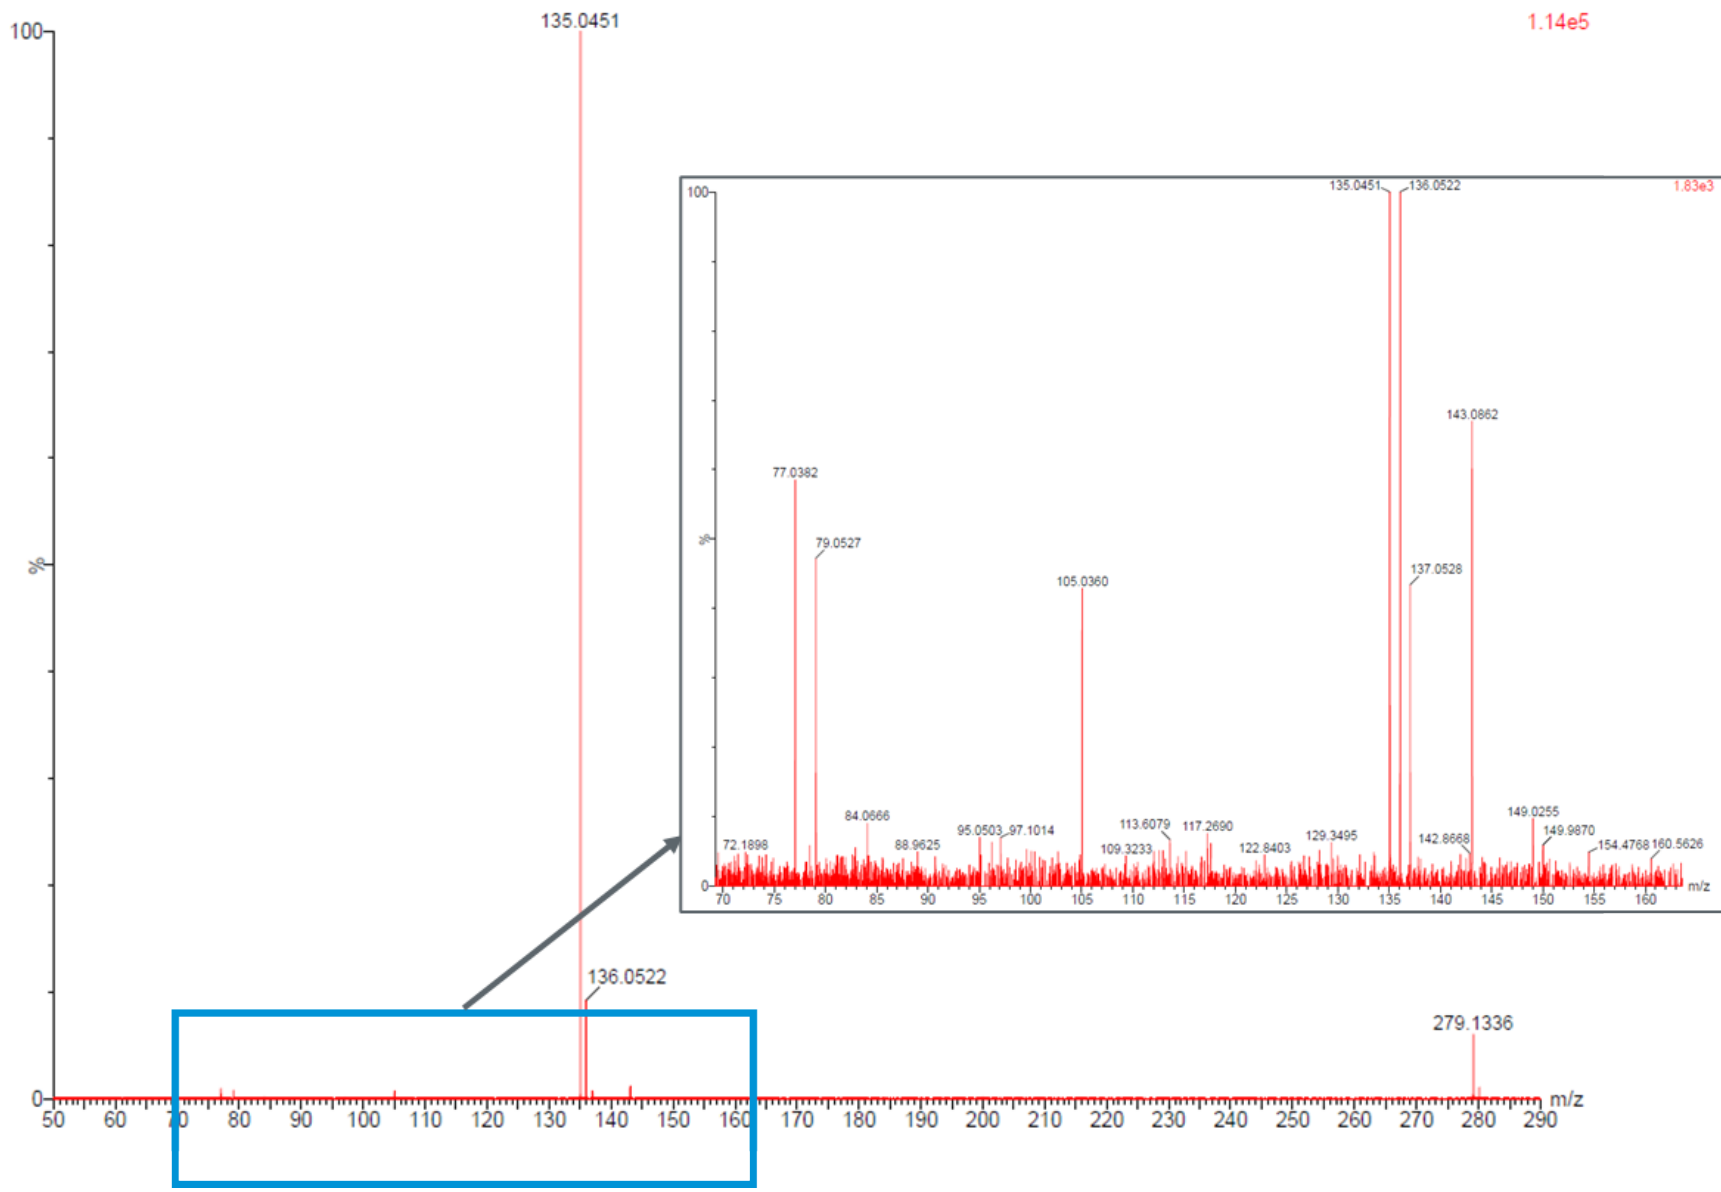

Figure 14: High resolution MSMS Spectrum of FAD1



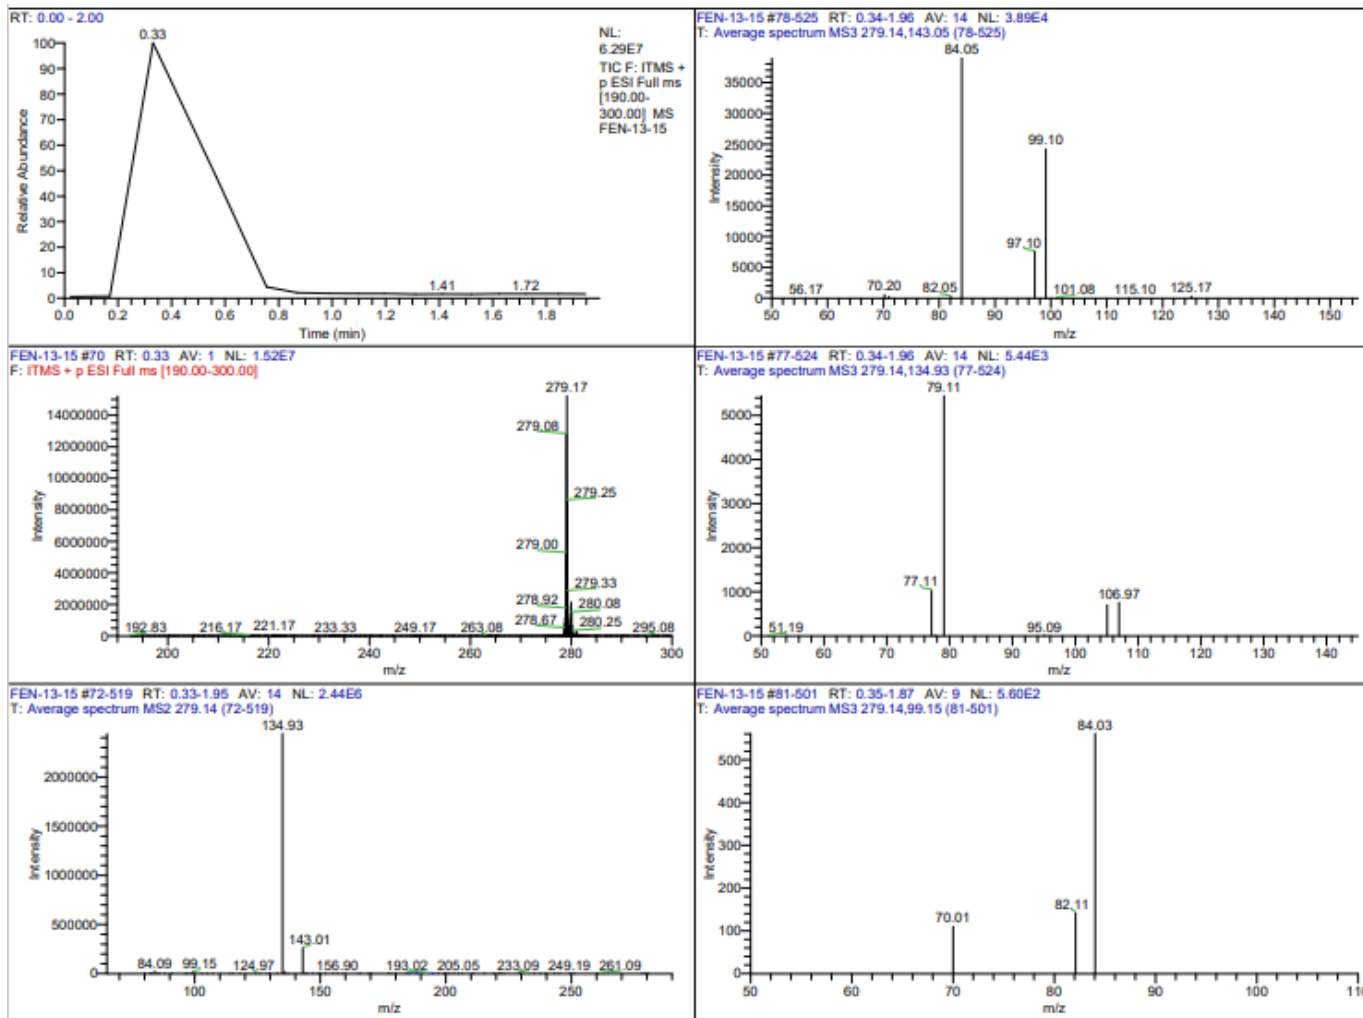

Figure 15: MS<sup>n</sup> Spectrum of FAD1

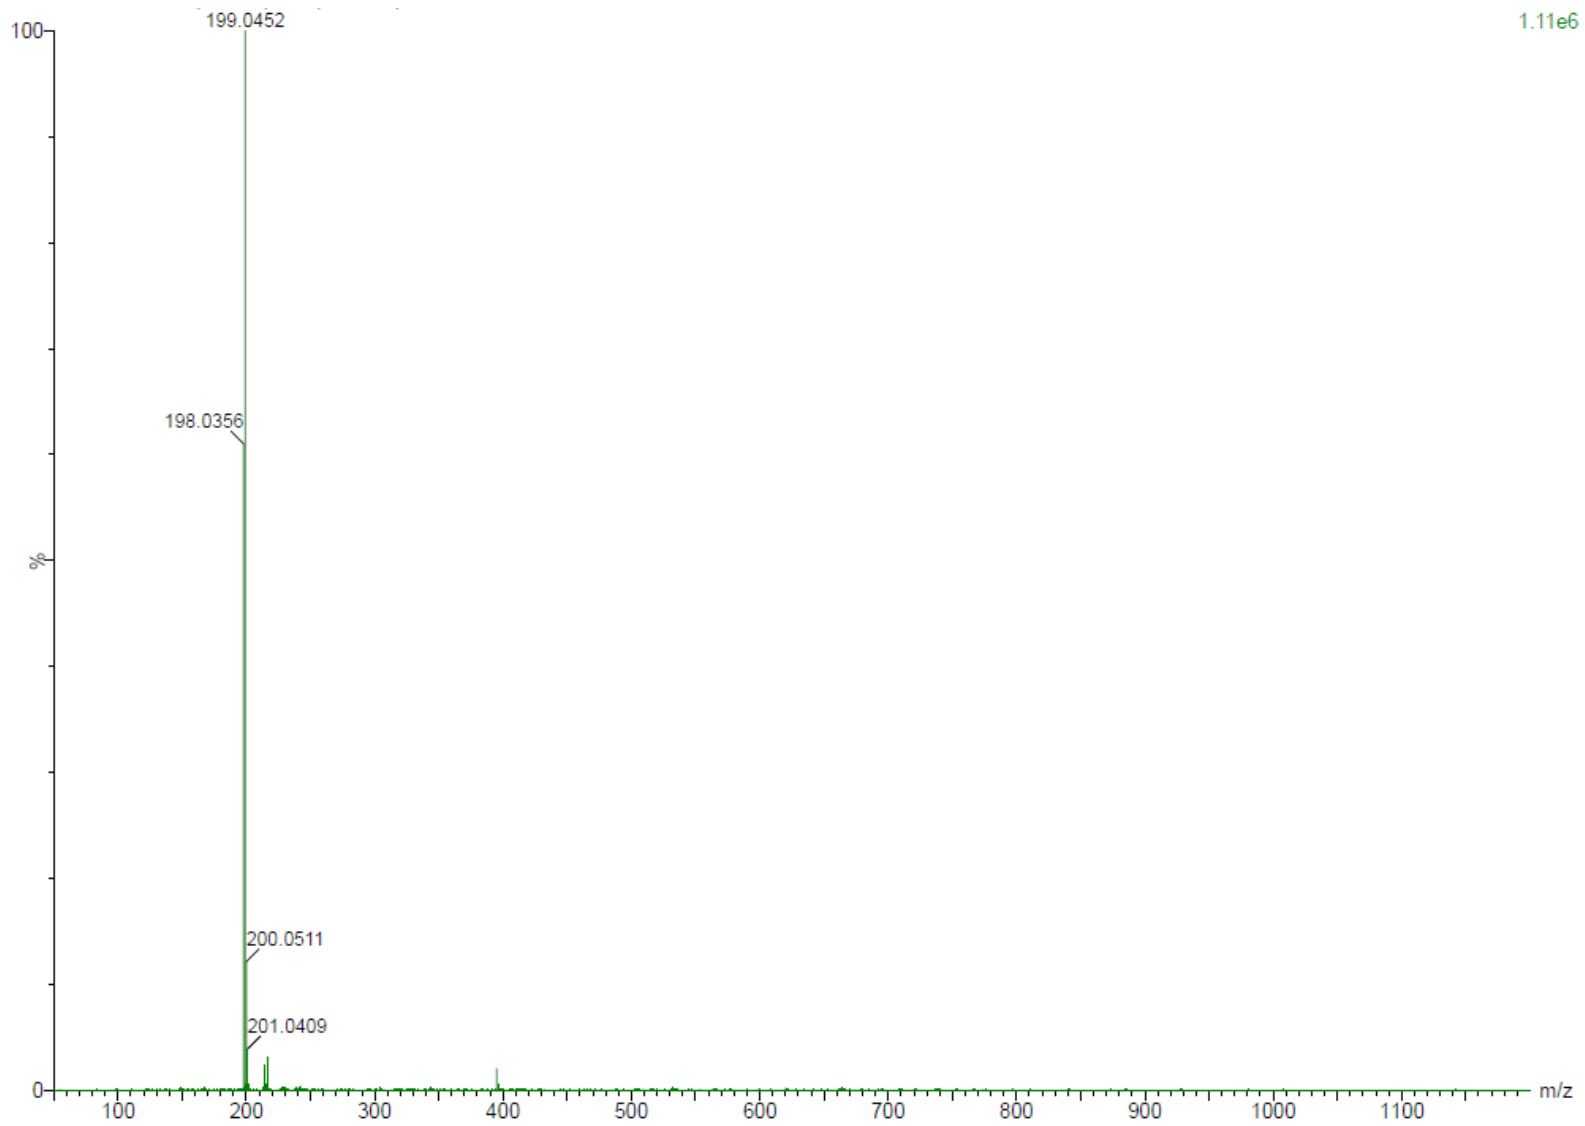

Figure 16: High resolution mass spectrum of FAD2

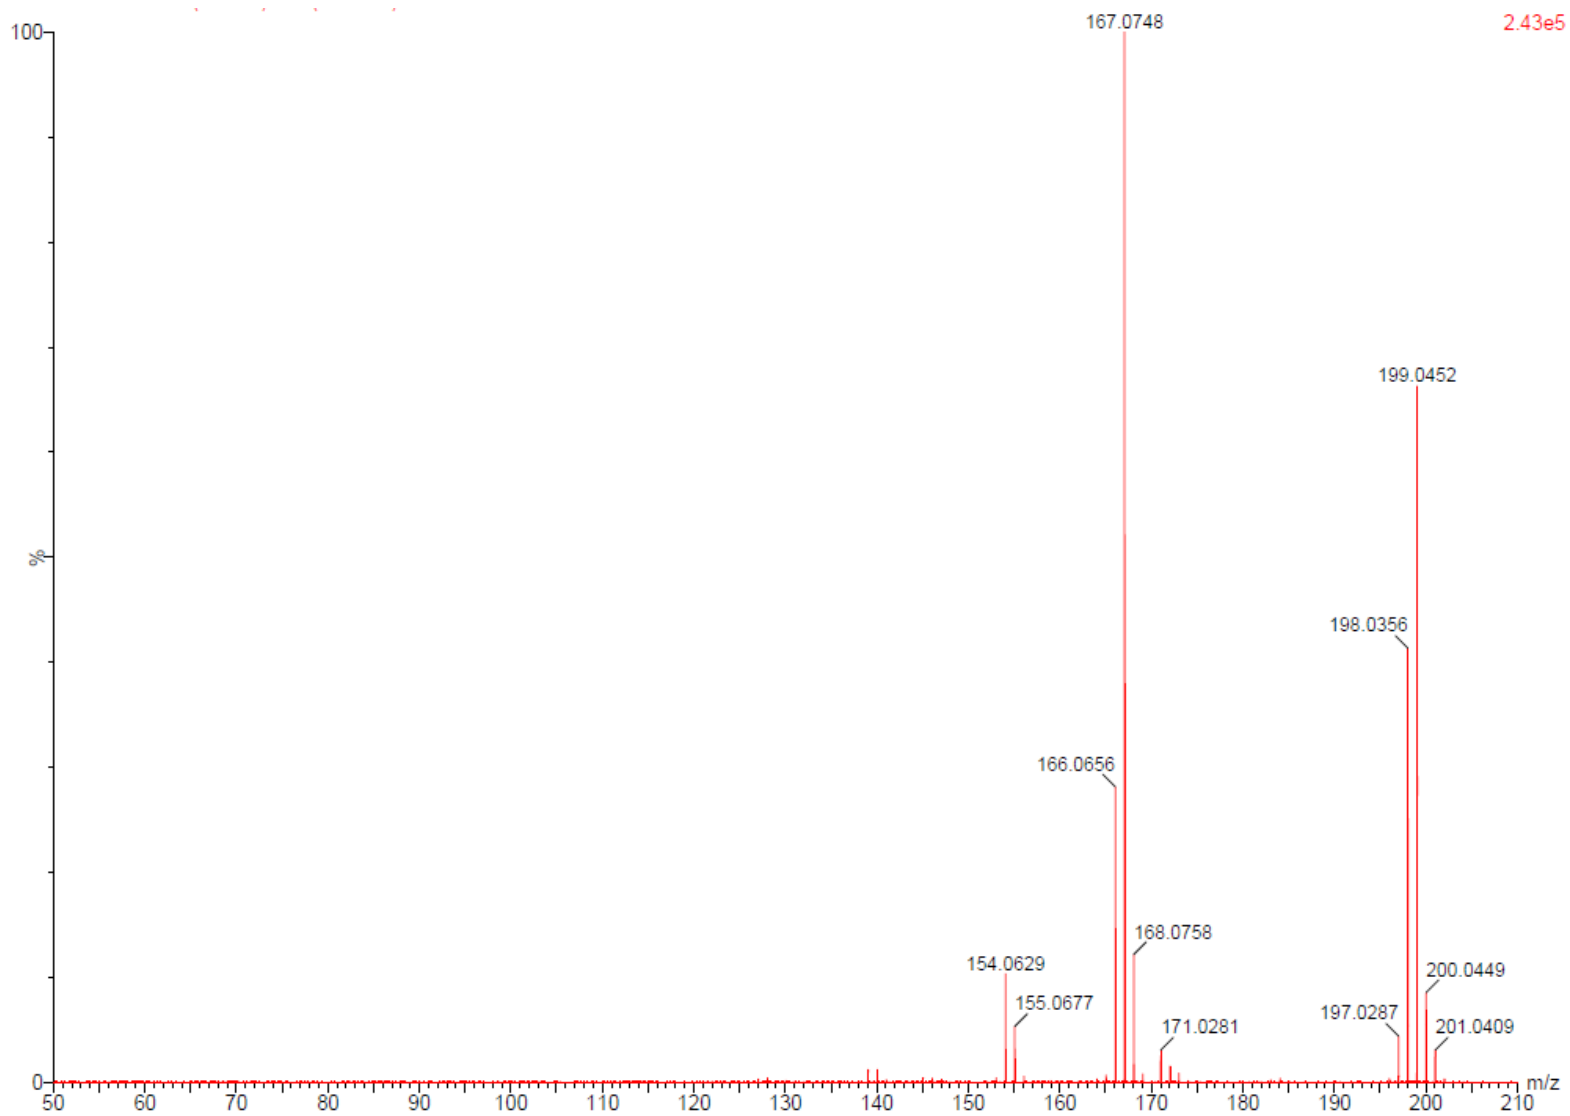

Figure 17: High resolution MSMS Spectrum of FAD2

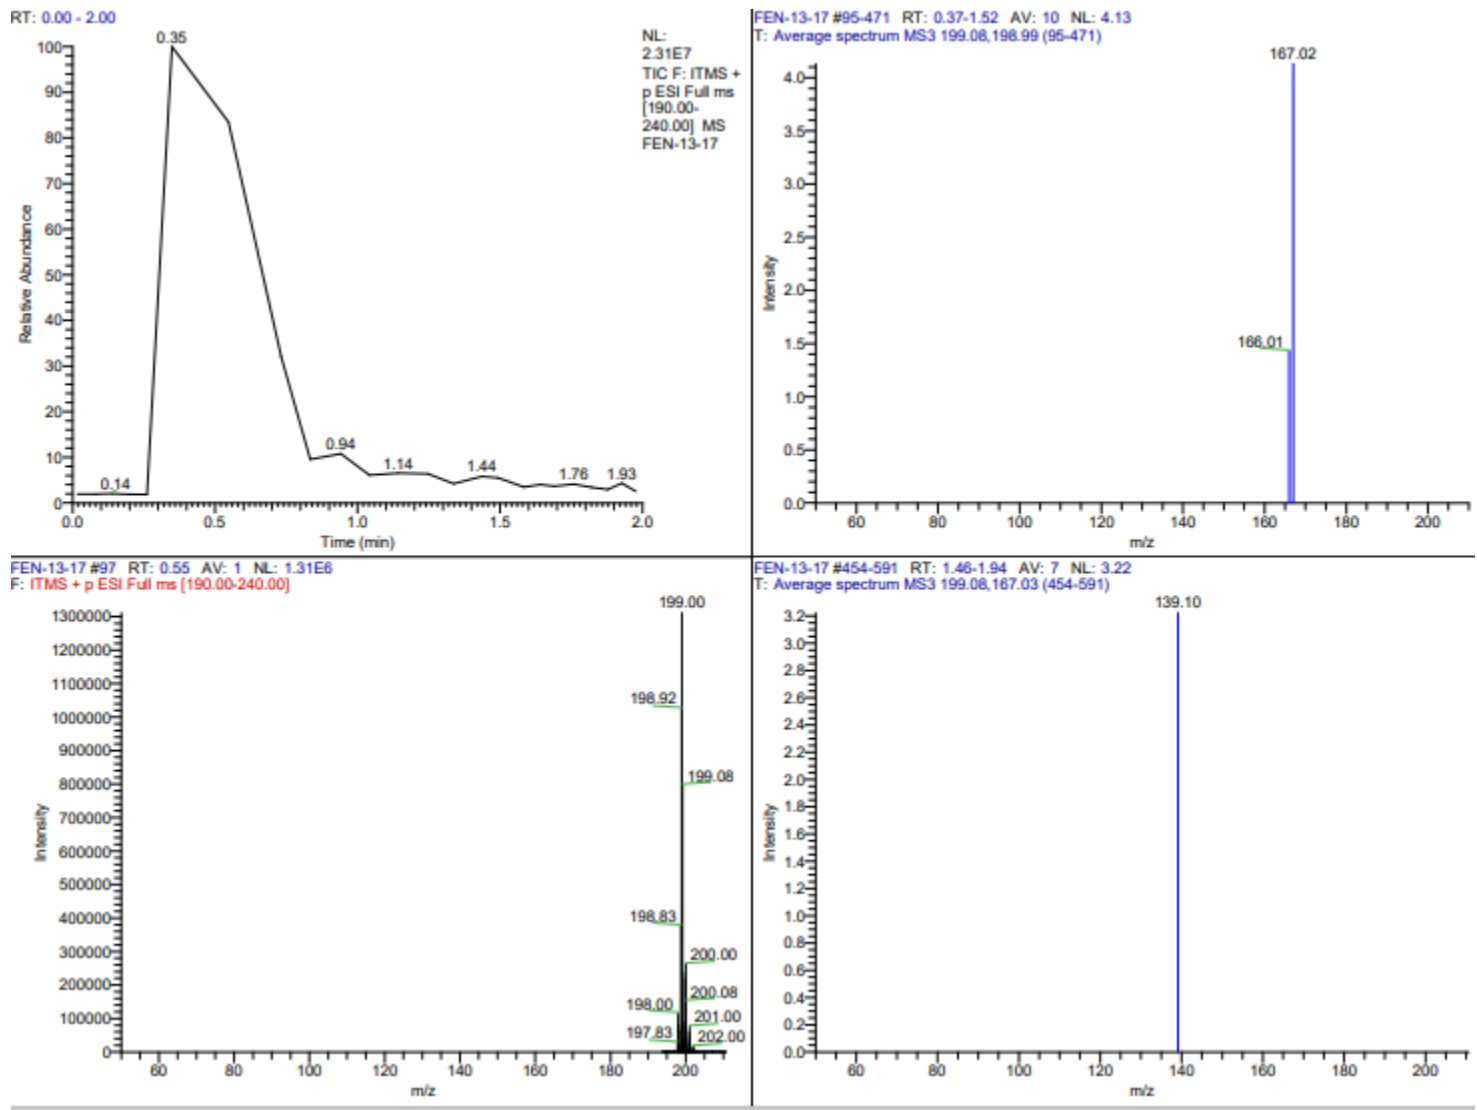

Figure 18: MS<sup>n</sup> Spectrum of FAD2

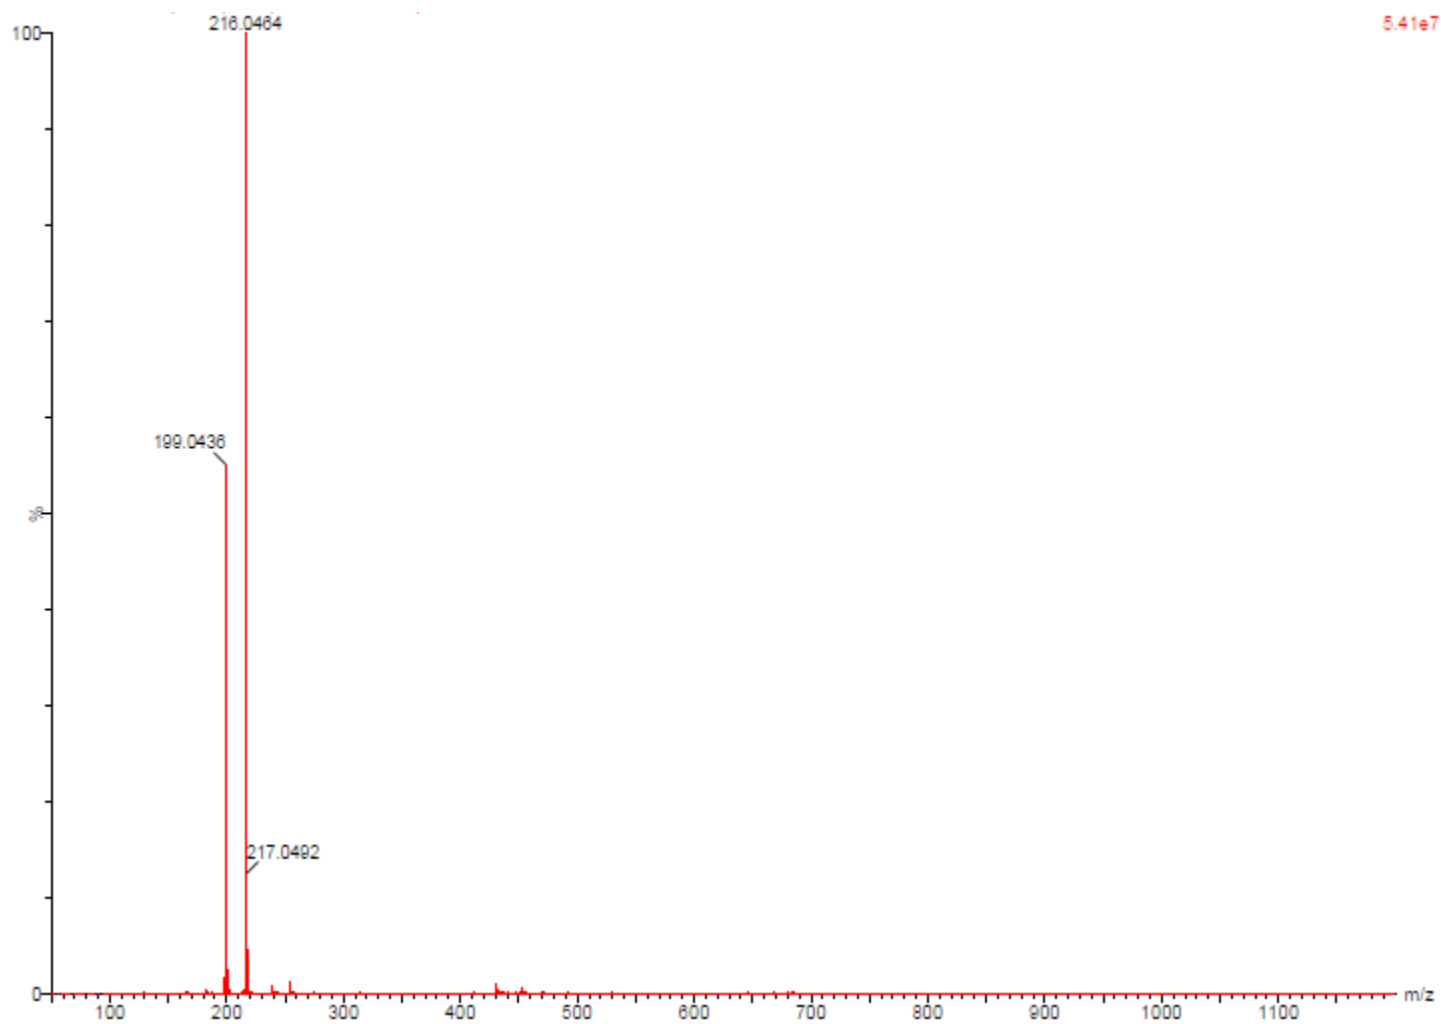

Figure 19: High resolution mass spectrum of FOD1

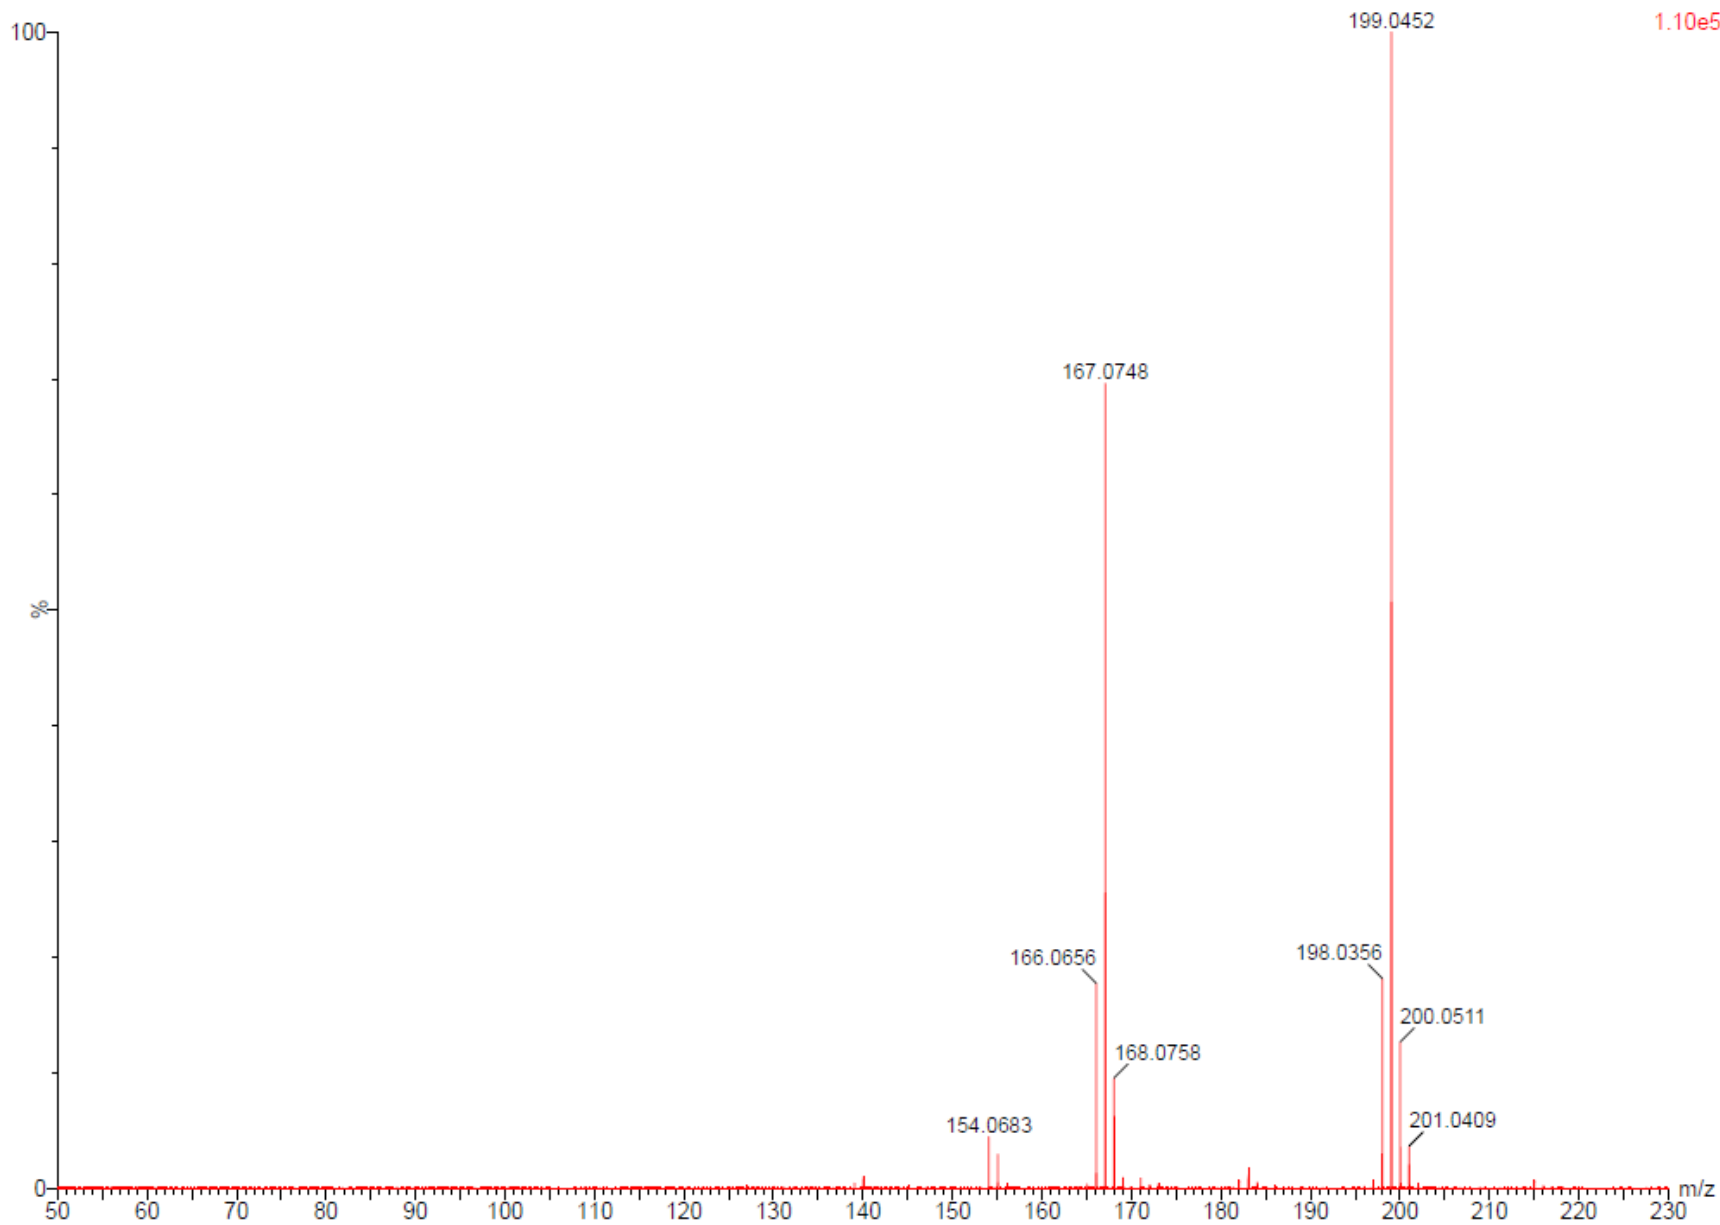

Figure 20: High resolution MSMS Spectrum of FOD1

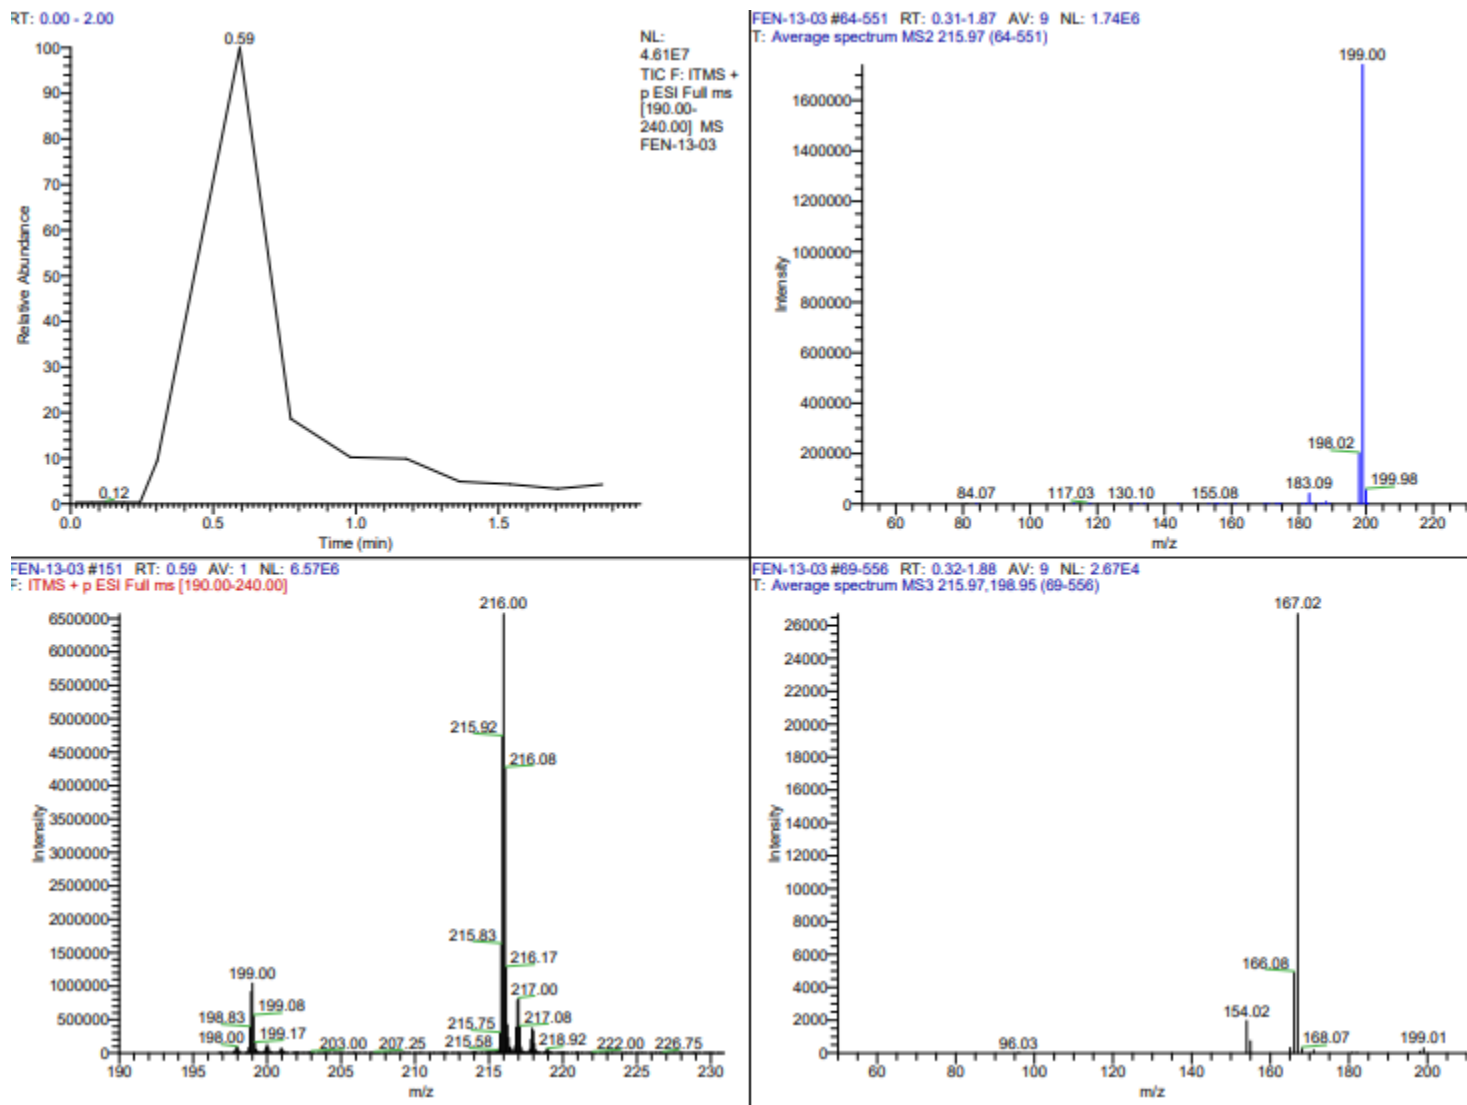

Figure 21: MS<sup>n</sup> Spectrum of FOD1

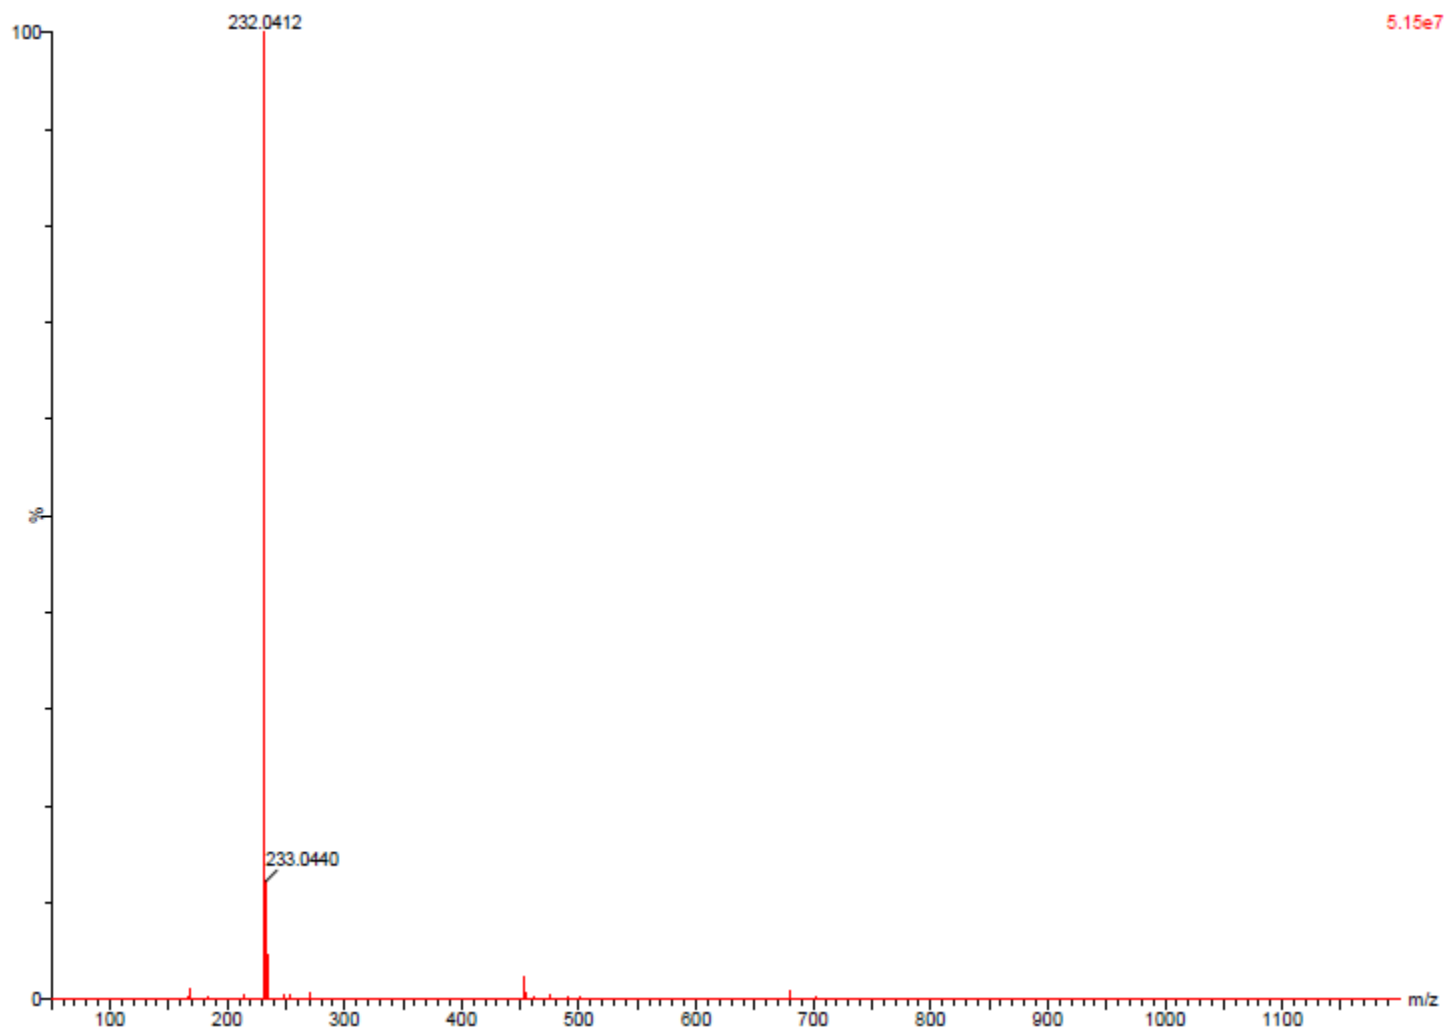

Figure 22: High resolution mass Spectrum of FOD2



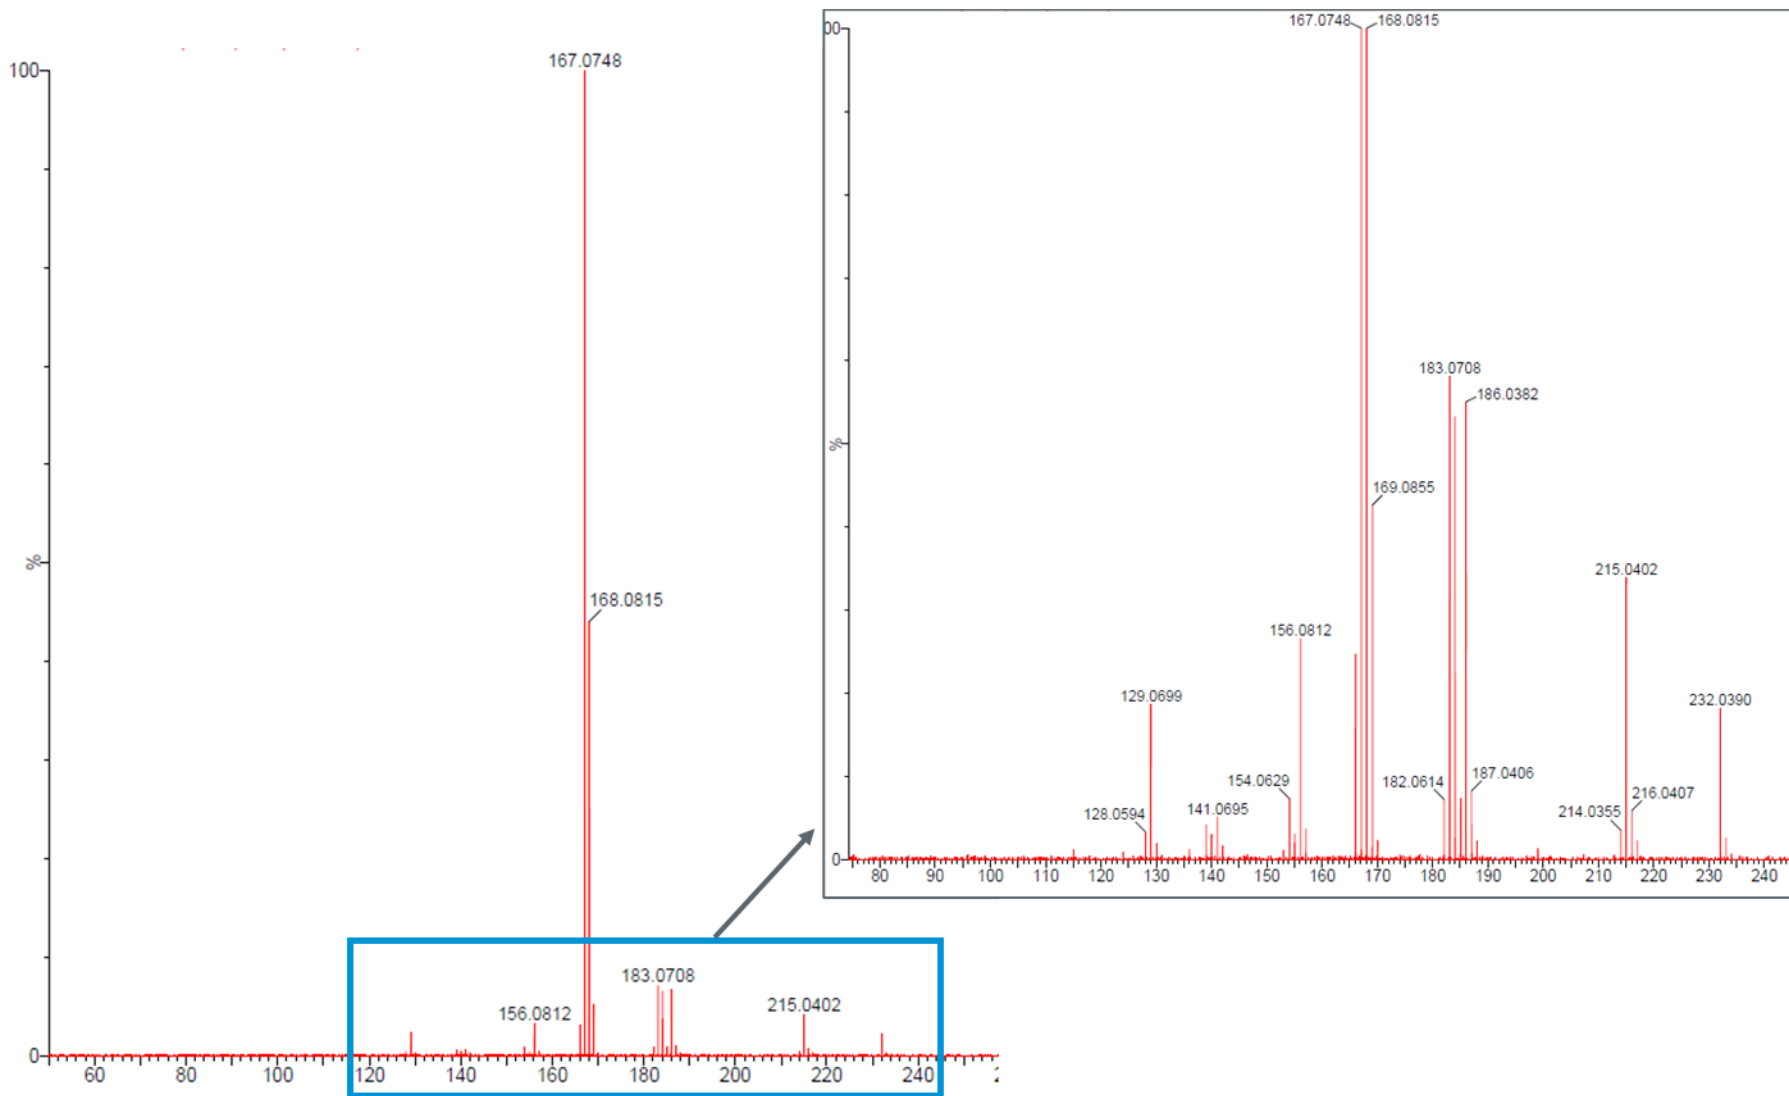

Figure 23: High resolution MSMS Spectrum of FOD2

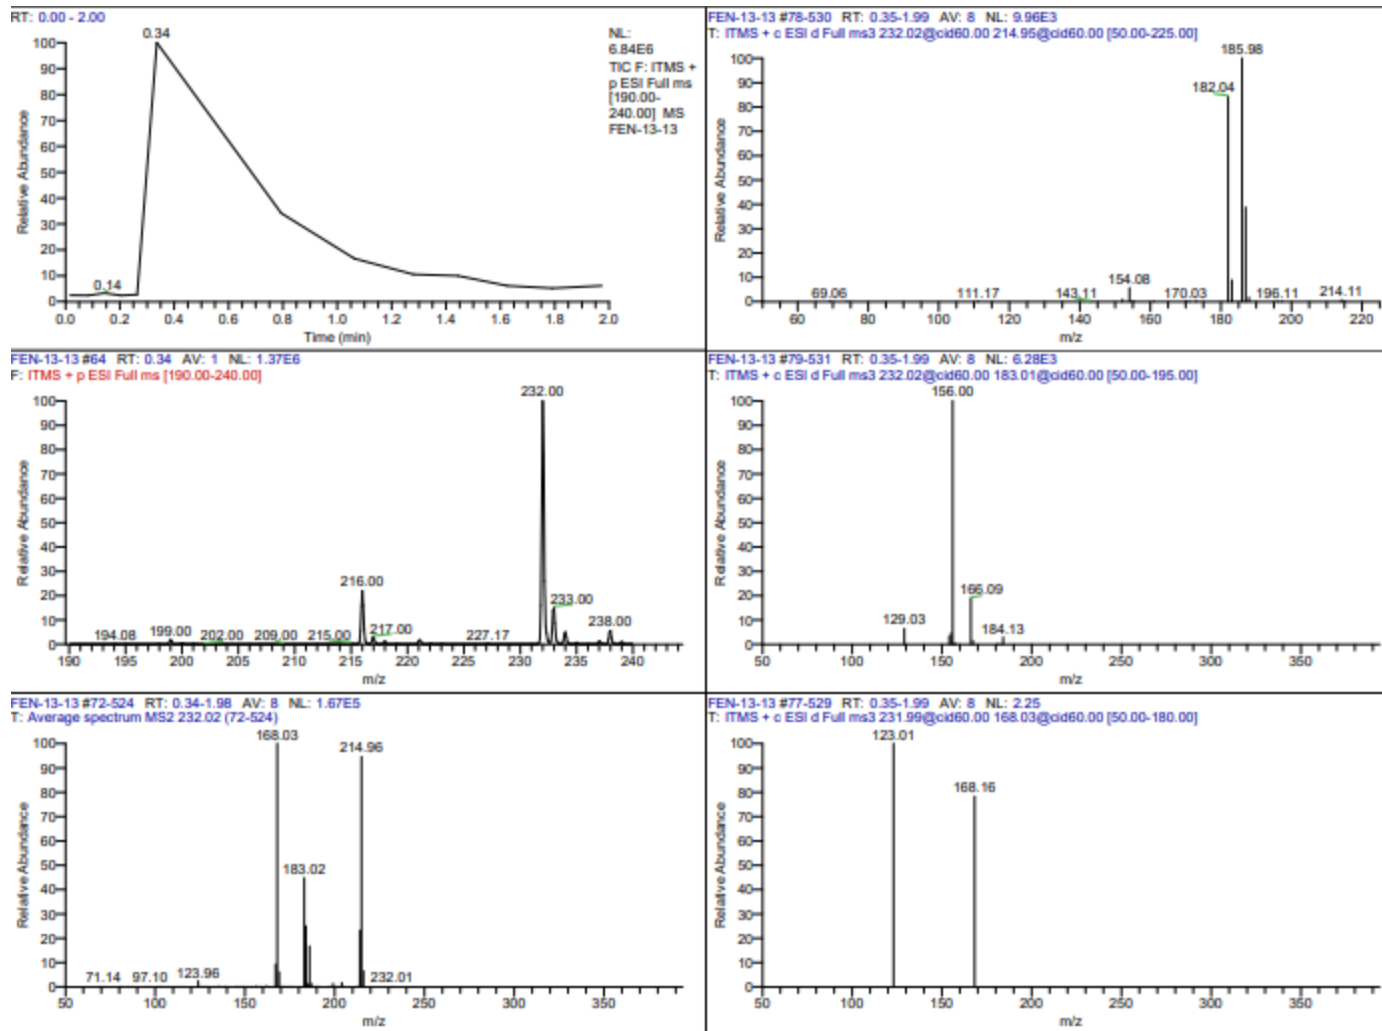

Figure 24: MS<sup>n</sup> spectrum of FOD2

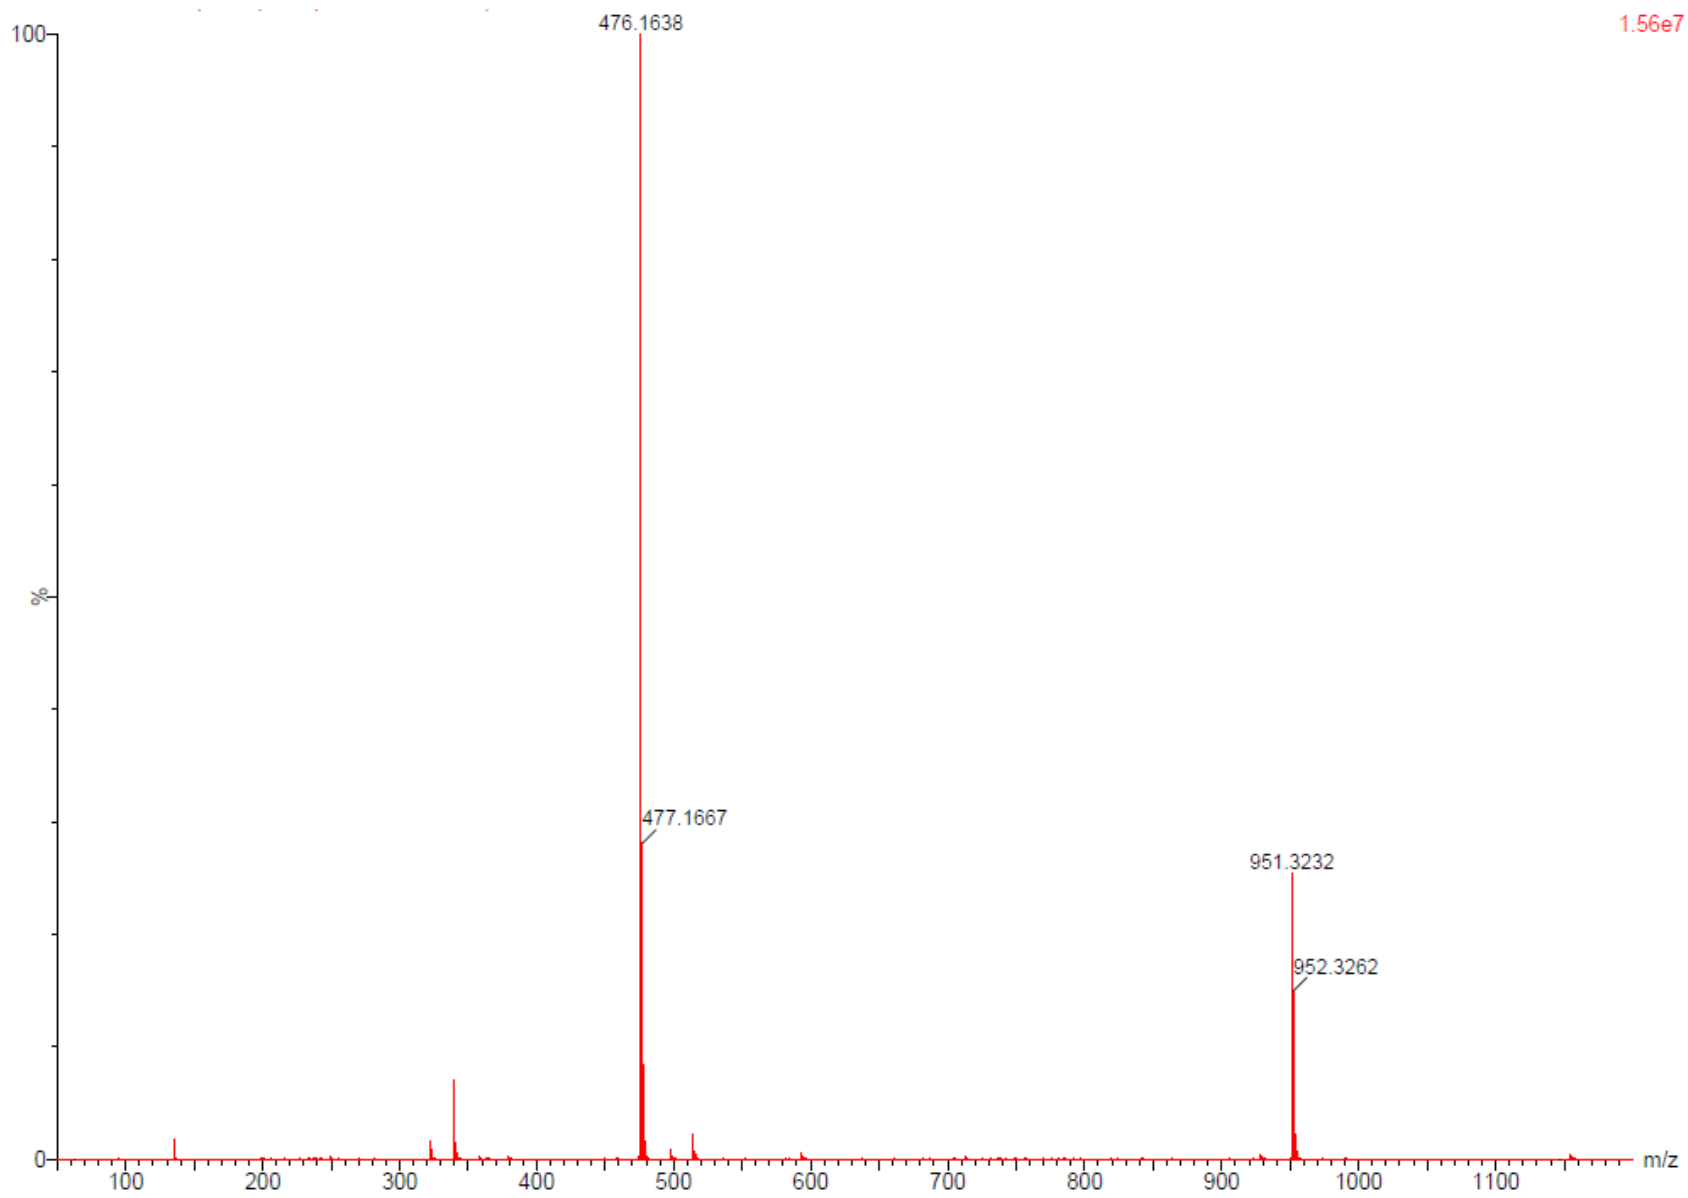

Figure 25: High resolution mass Spectrum of FOD3

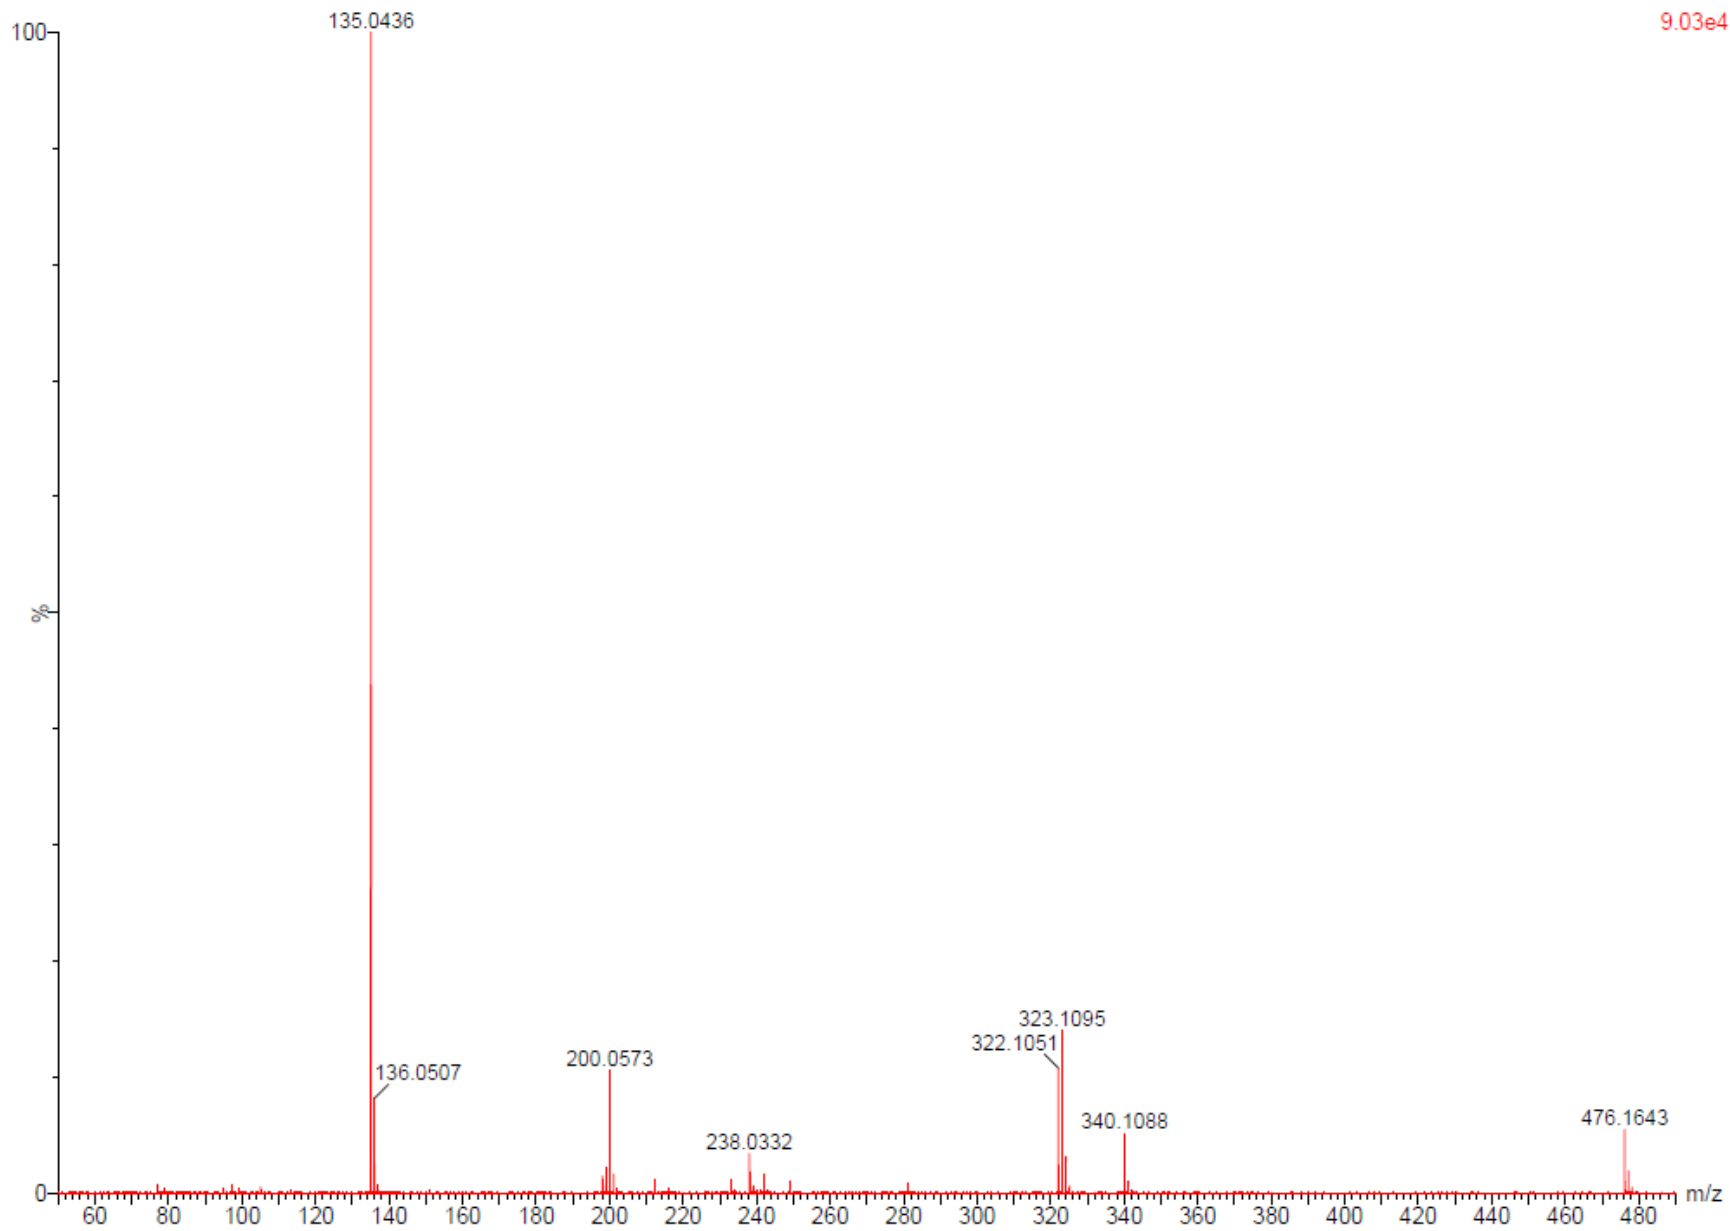

Figure 26: High resolution MSMS Spectrum of FOD3

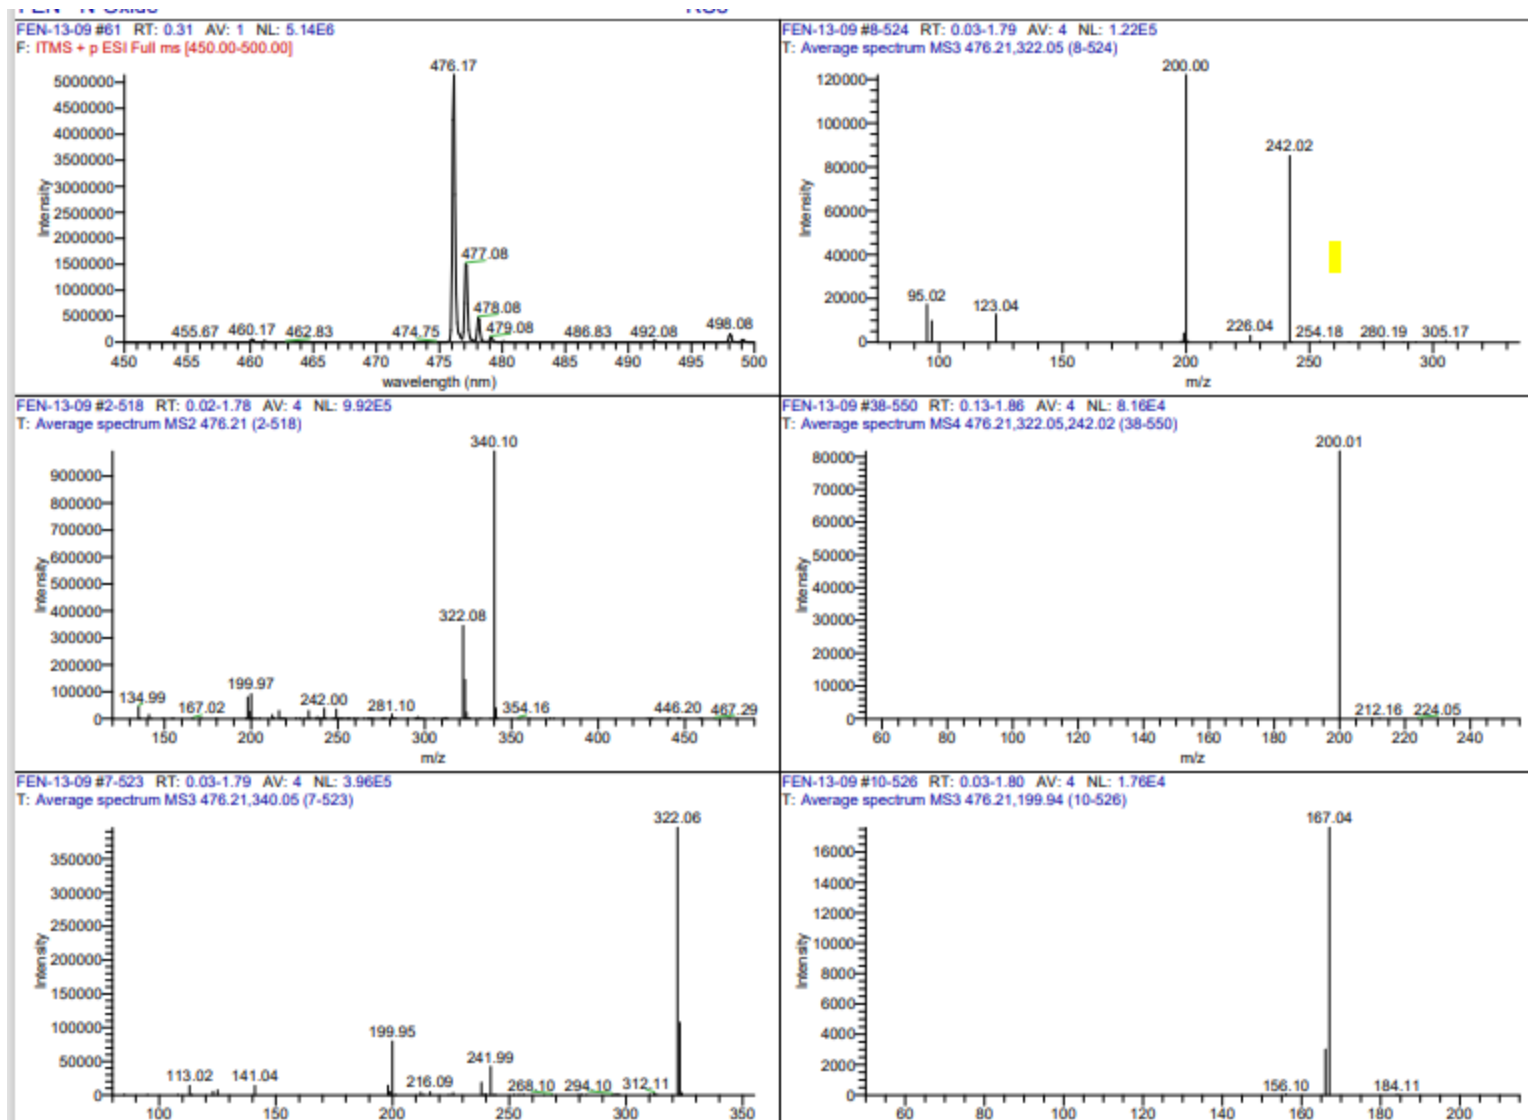

Figure 27: MS<sup>n</sup> spectrum of FOD3

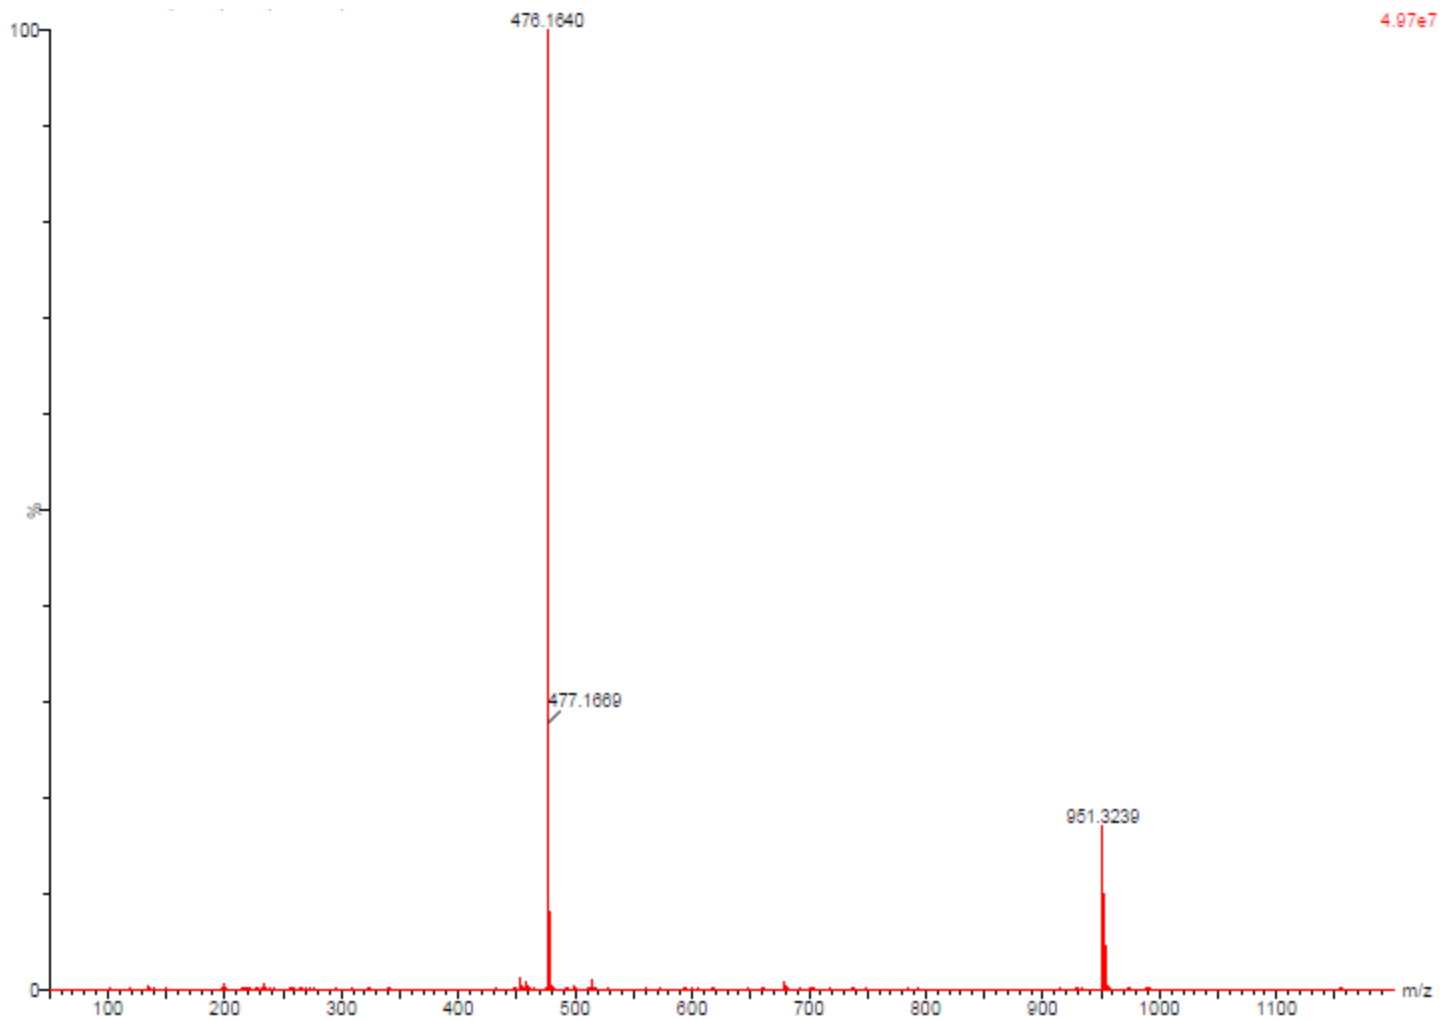

Figure 28: High resolution mass Spectrum of FOD4

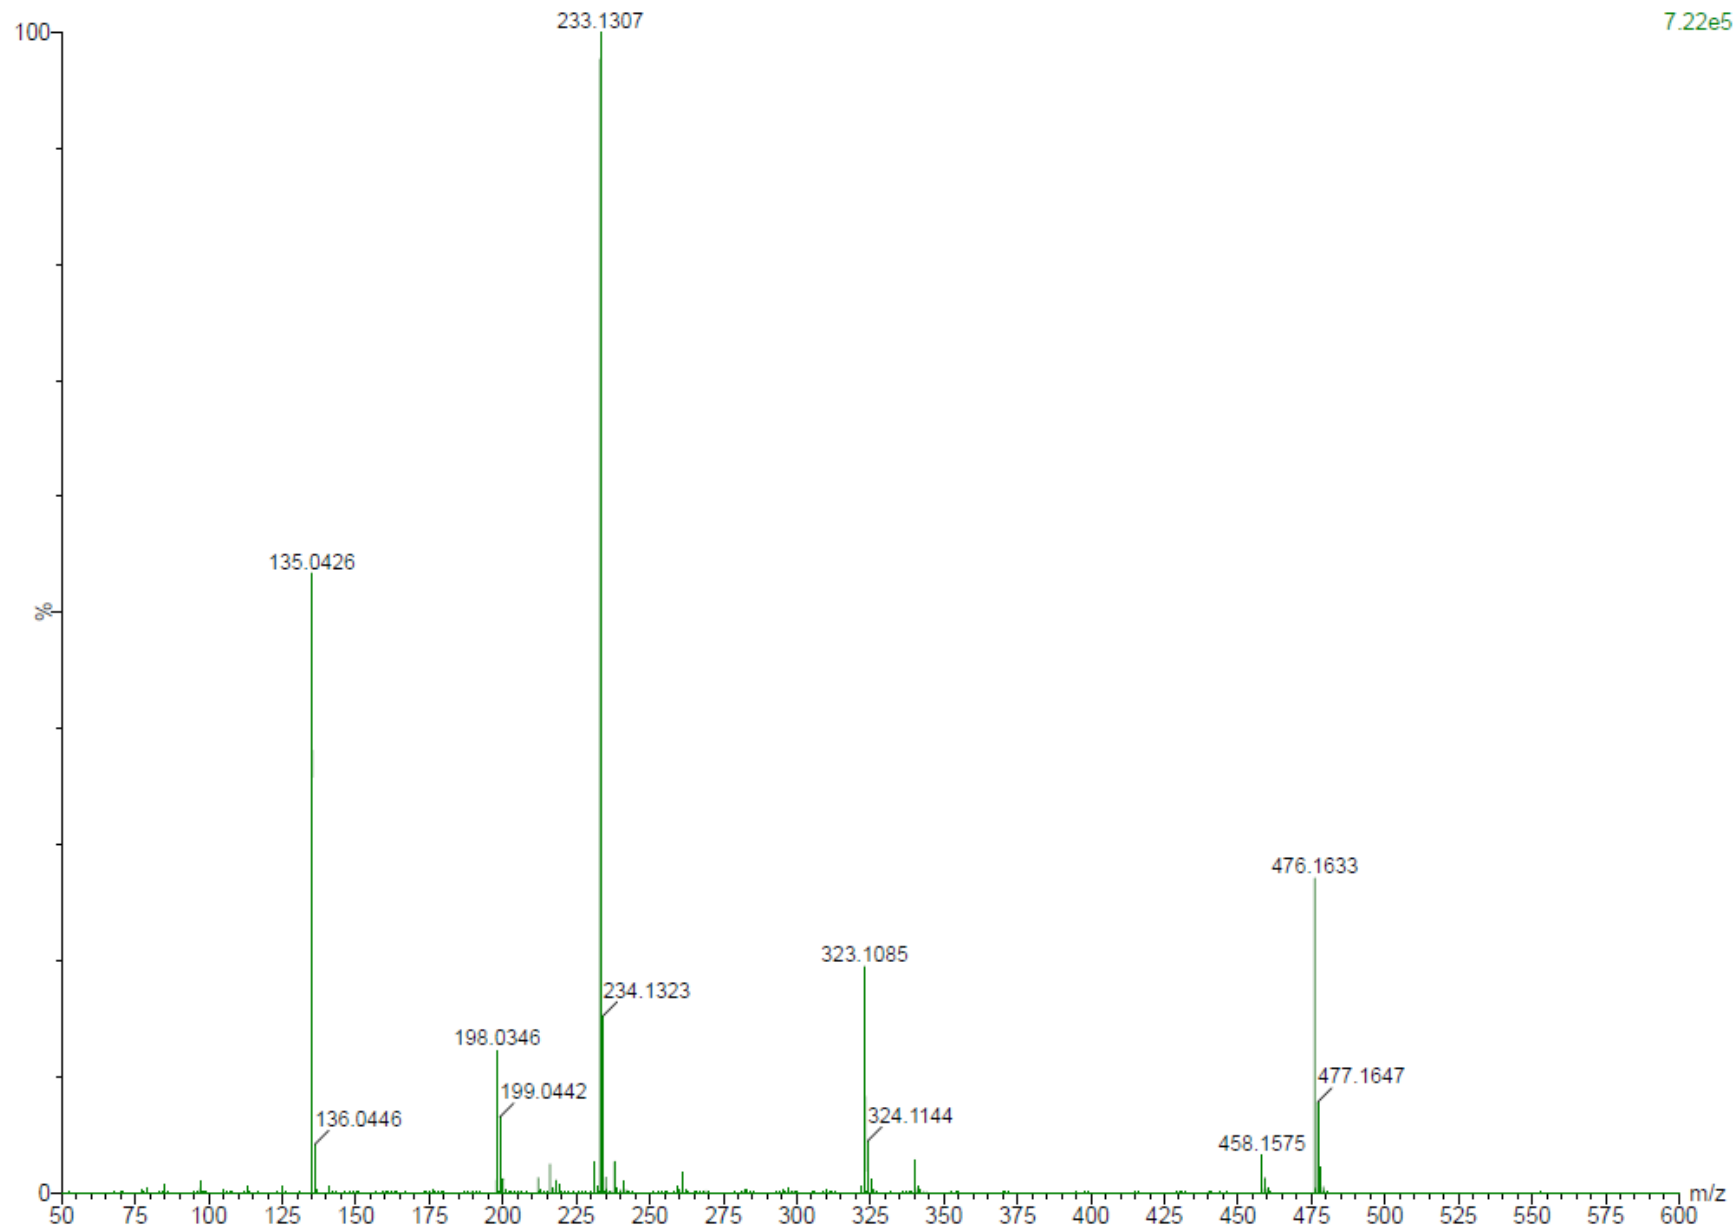

Figure 29: High resolution MSMS Spectrum of FOD4

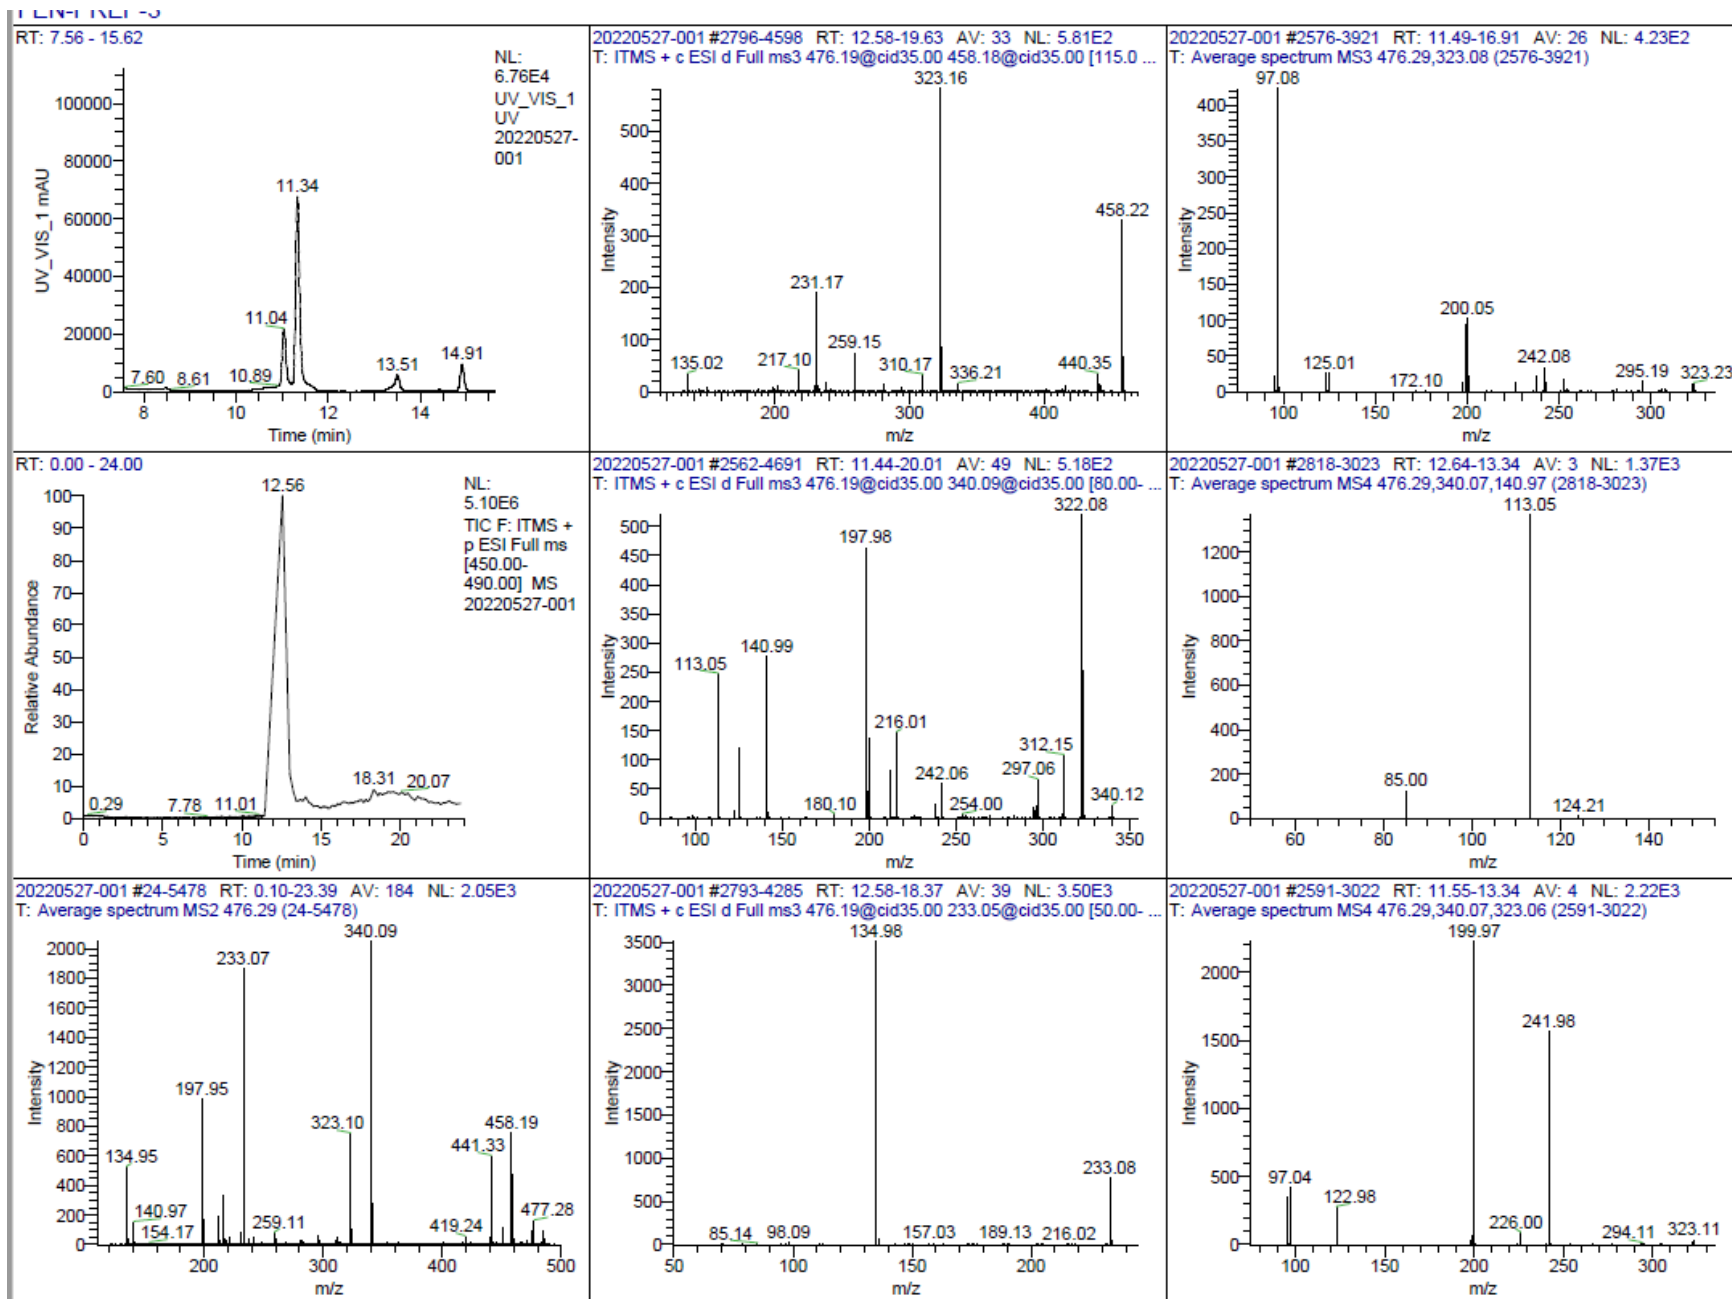

Figure 30: MS<sup>n</sup> spectrum of FOD4



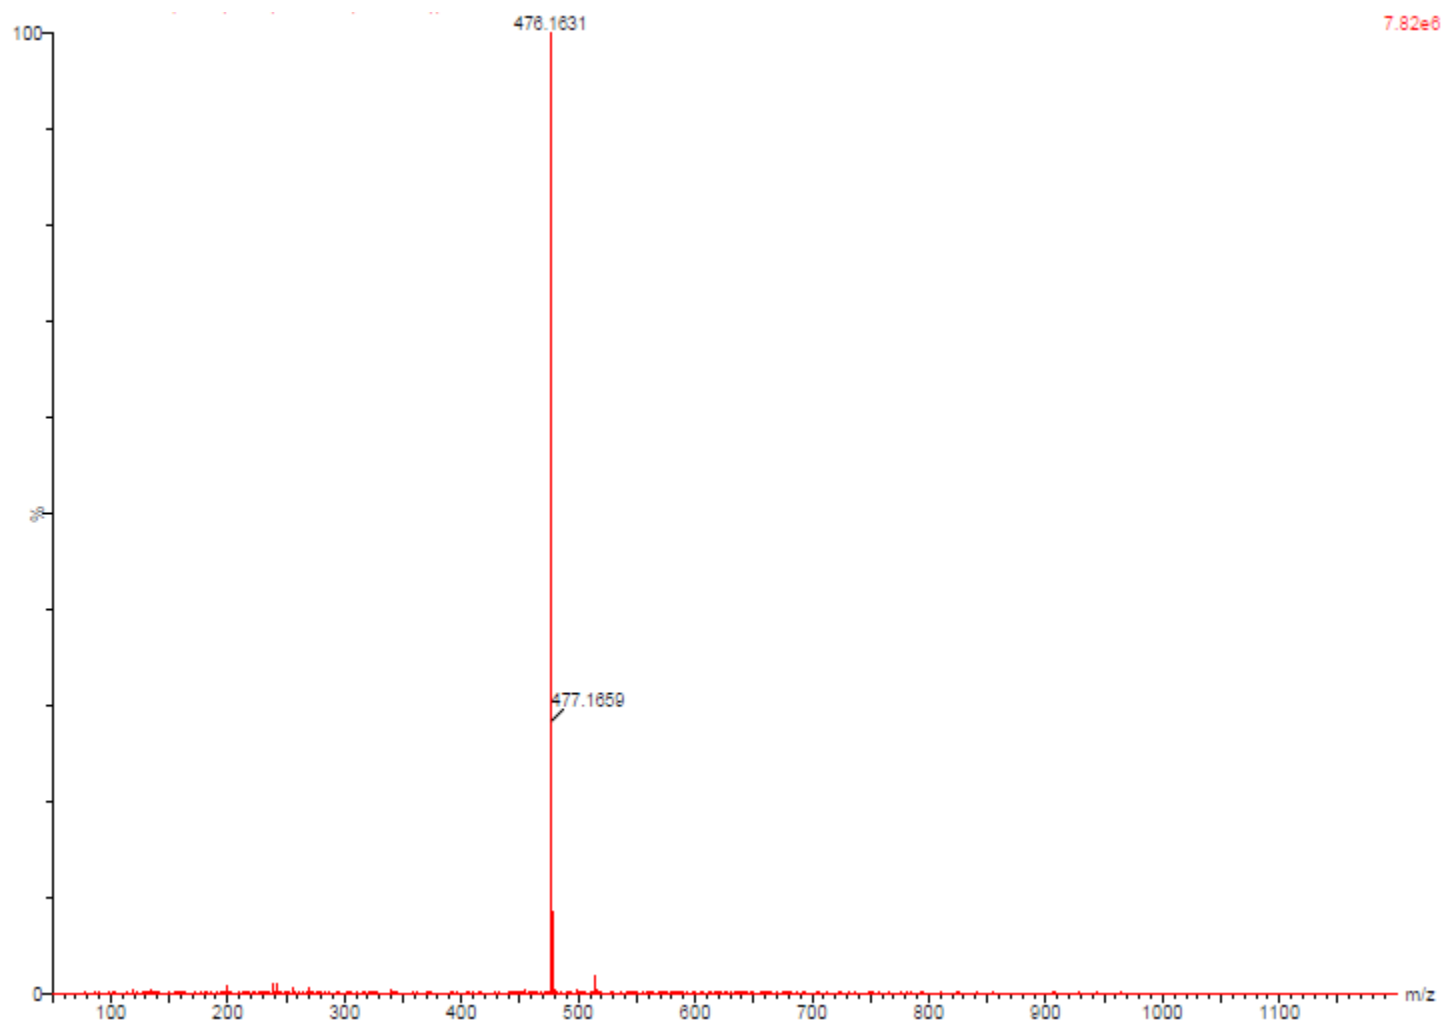

Figure 31: High resolution mass Spectrum of FOD5

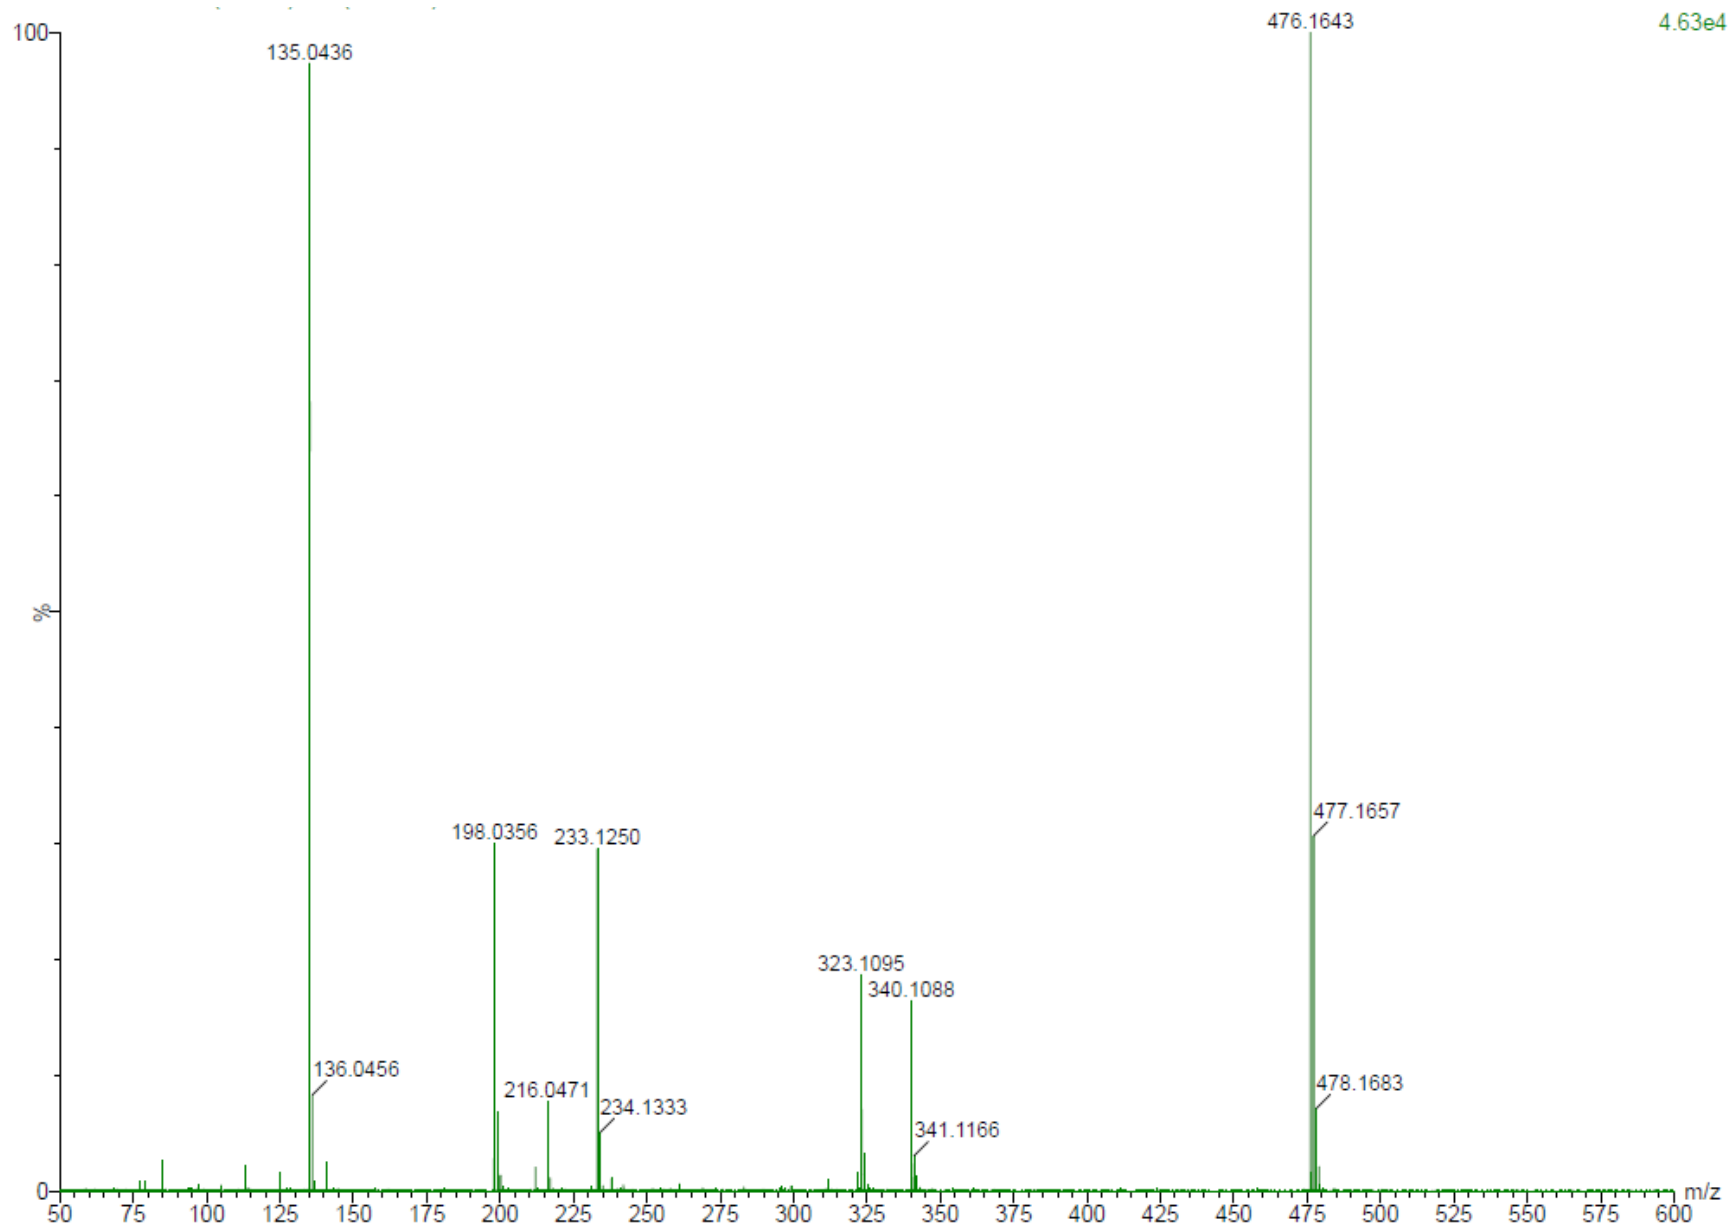

Figure 32: High resolution MSMS Spectrum of FOD5

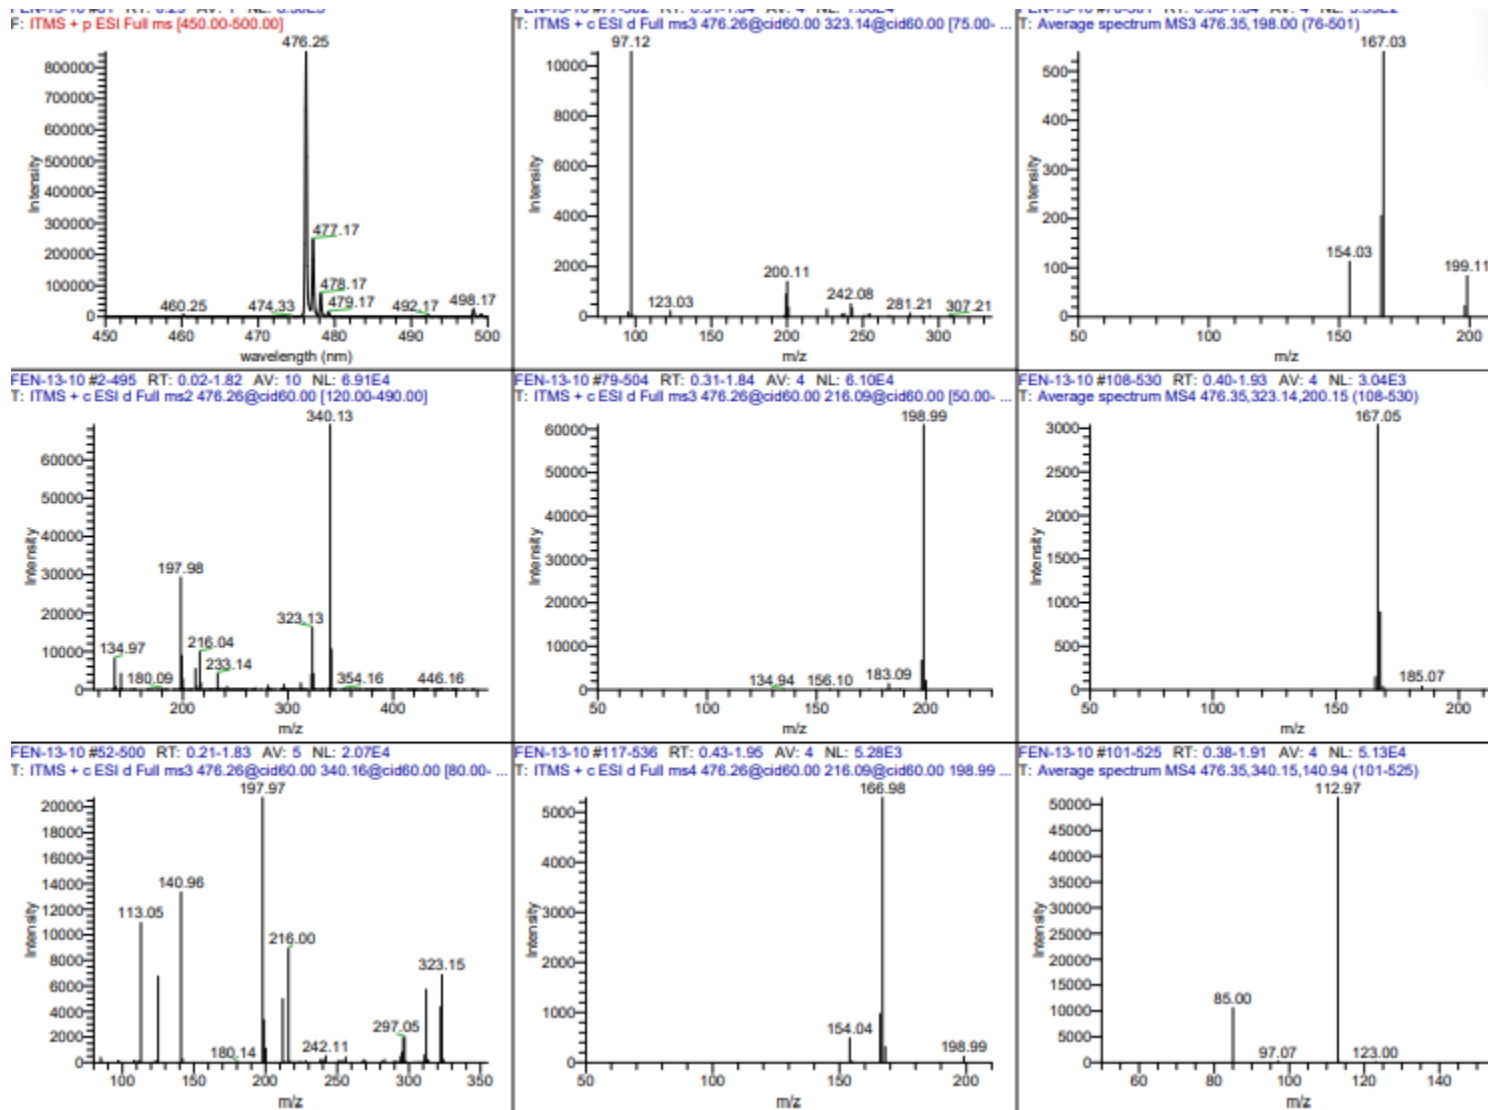

Figure 33: MS<sup>n</sup> spectrum of FOD5

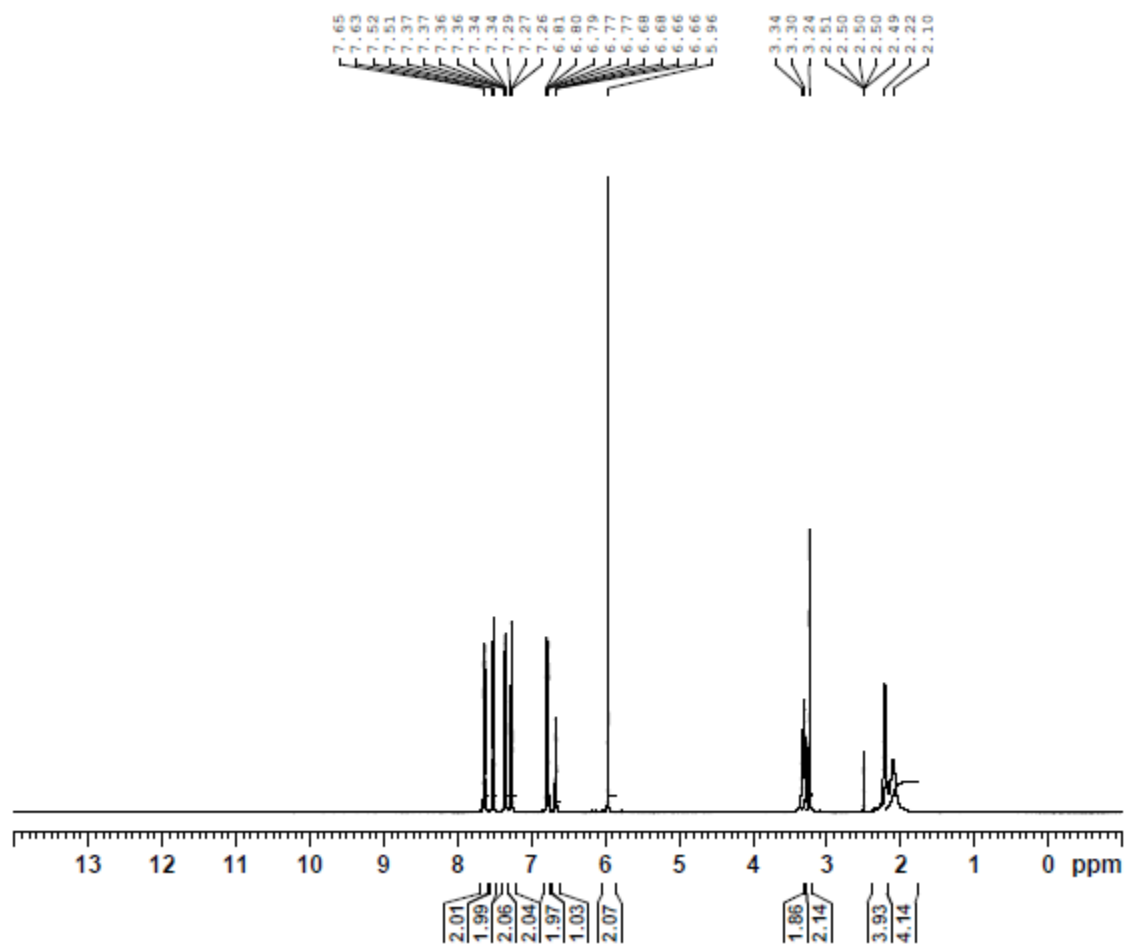

Figure 34: <sup>1</sup>H NMR Spectrum of FEN (500 MHz, DMSO-*d*<sub>6</sub>, 300K)

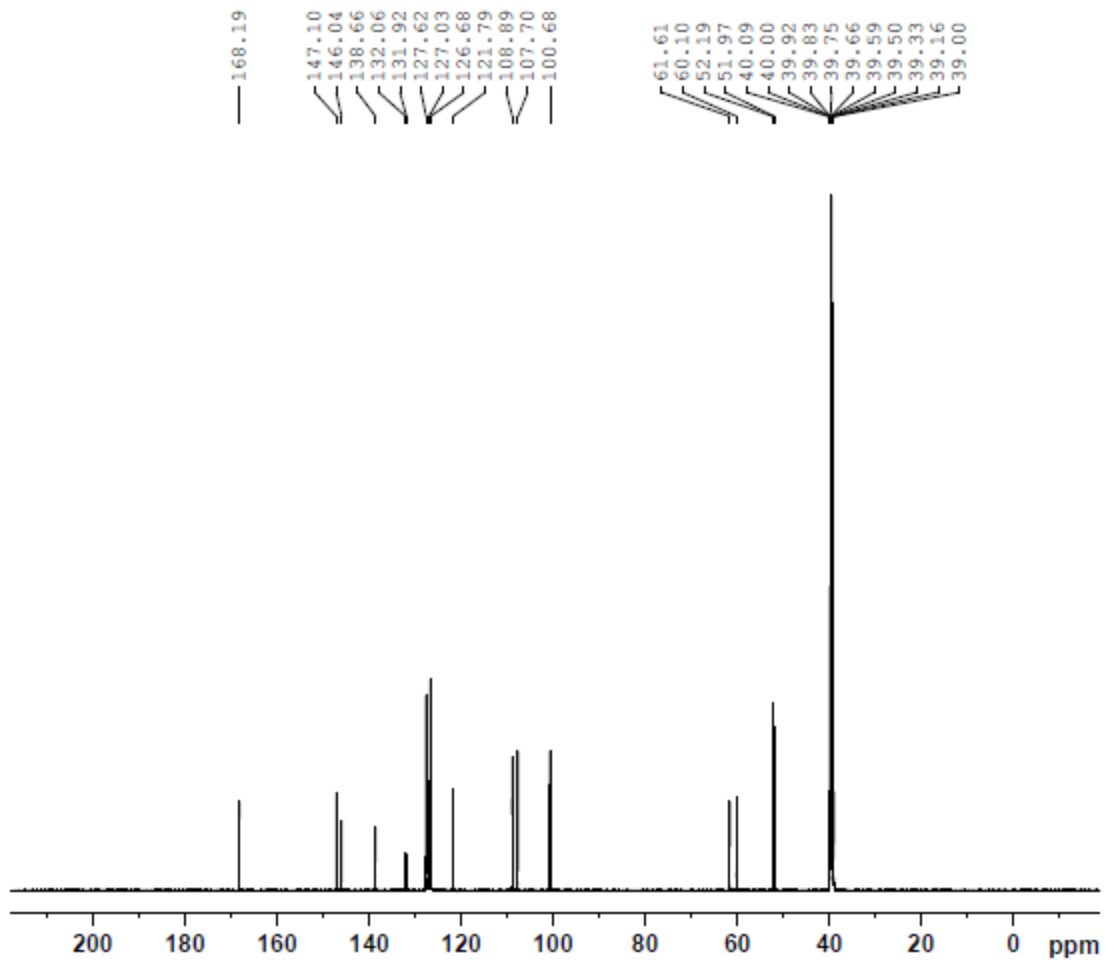

Figure 35:  $^{13}\text{C}$  NMR Spectrum of FEN (126 MHz, DMSO-d<sub>6</sub>, 300K)

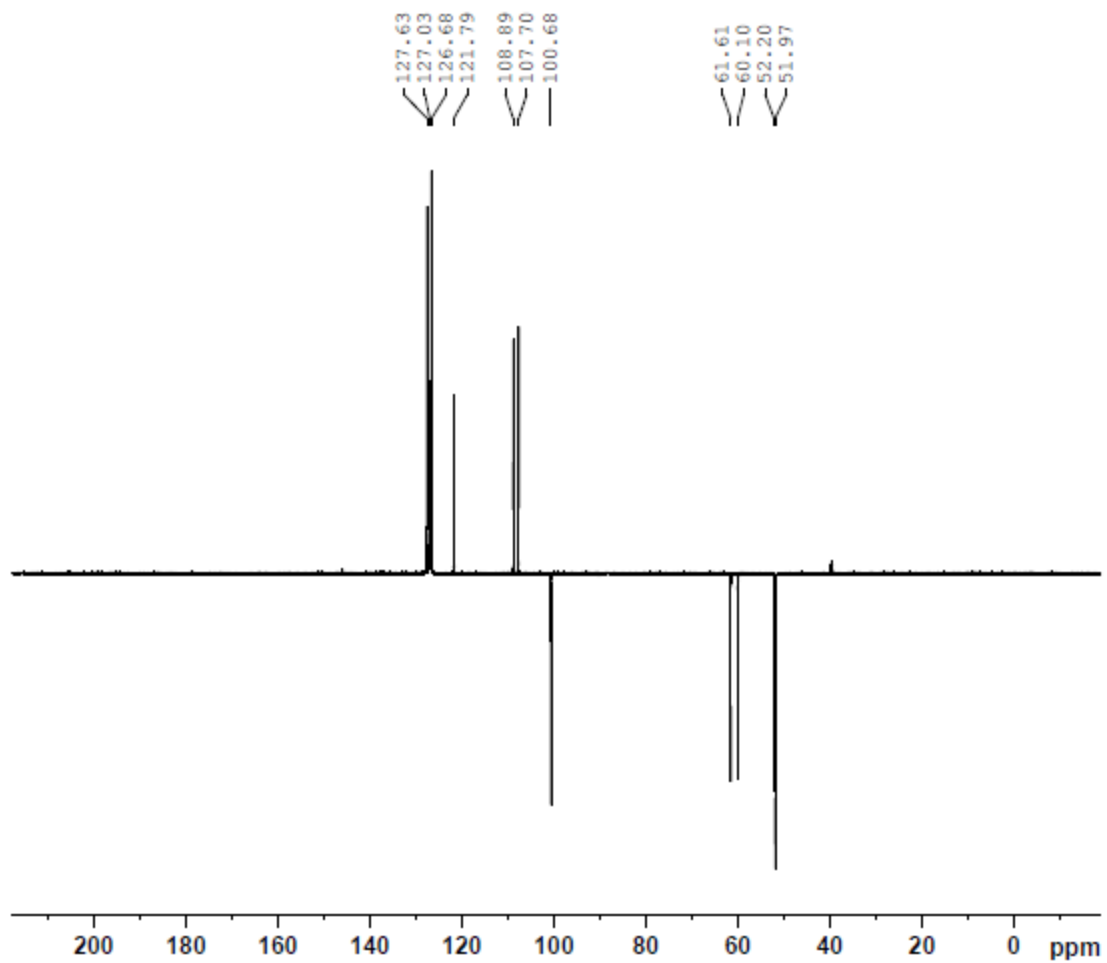

Figure 36: DEPT135 NMR Spectrum of FEN (126 MHz, DMSO-d<sub>6</sub>, 300K)

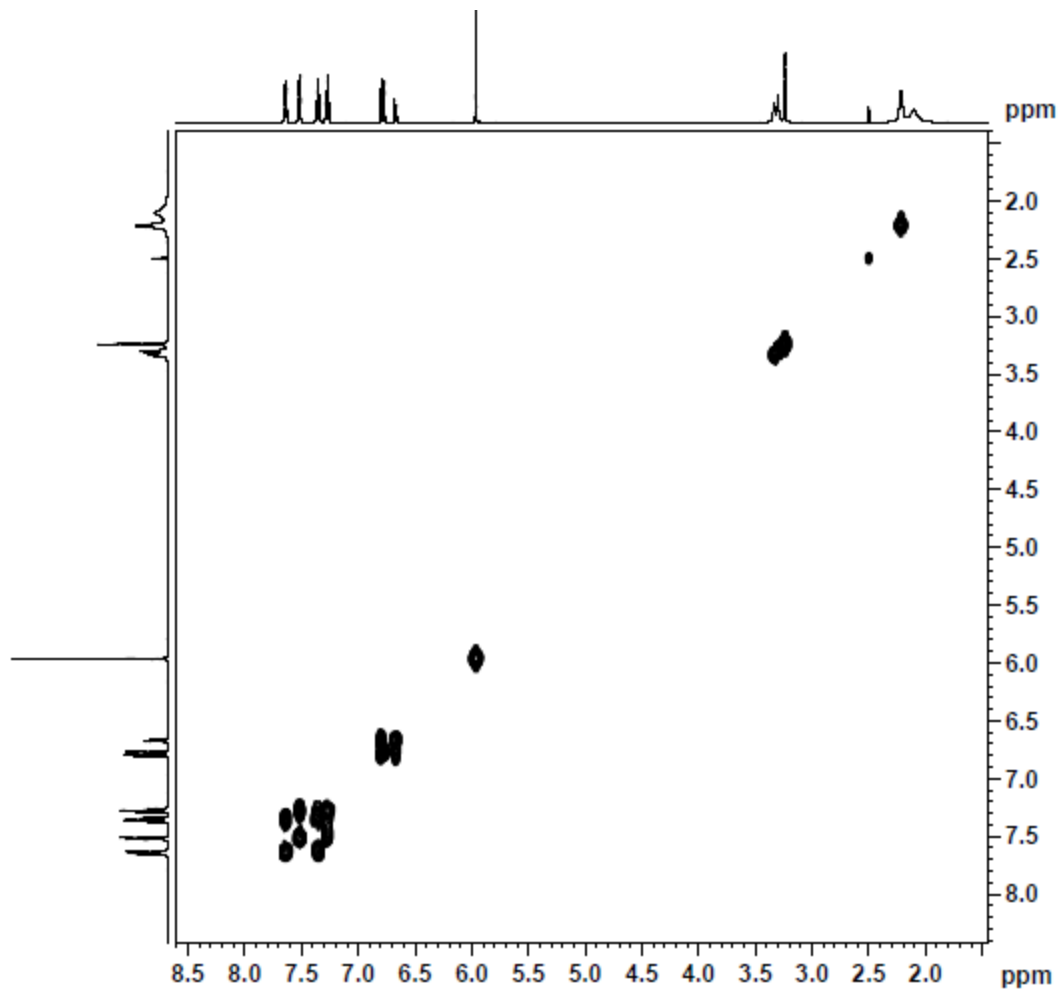

Figure 37: COSY NMR Spectrum of FEN (500 MHz, DMSO-d<sub>6</sub>, 300K)

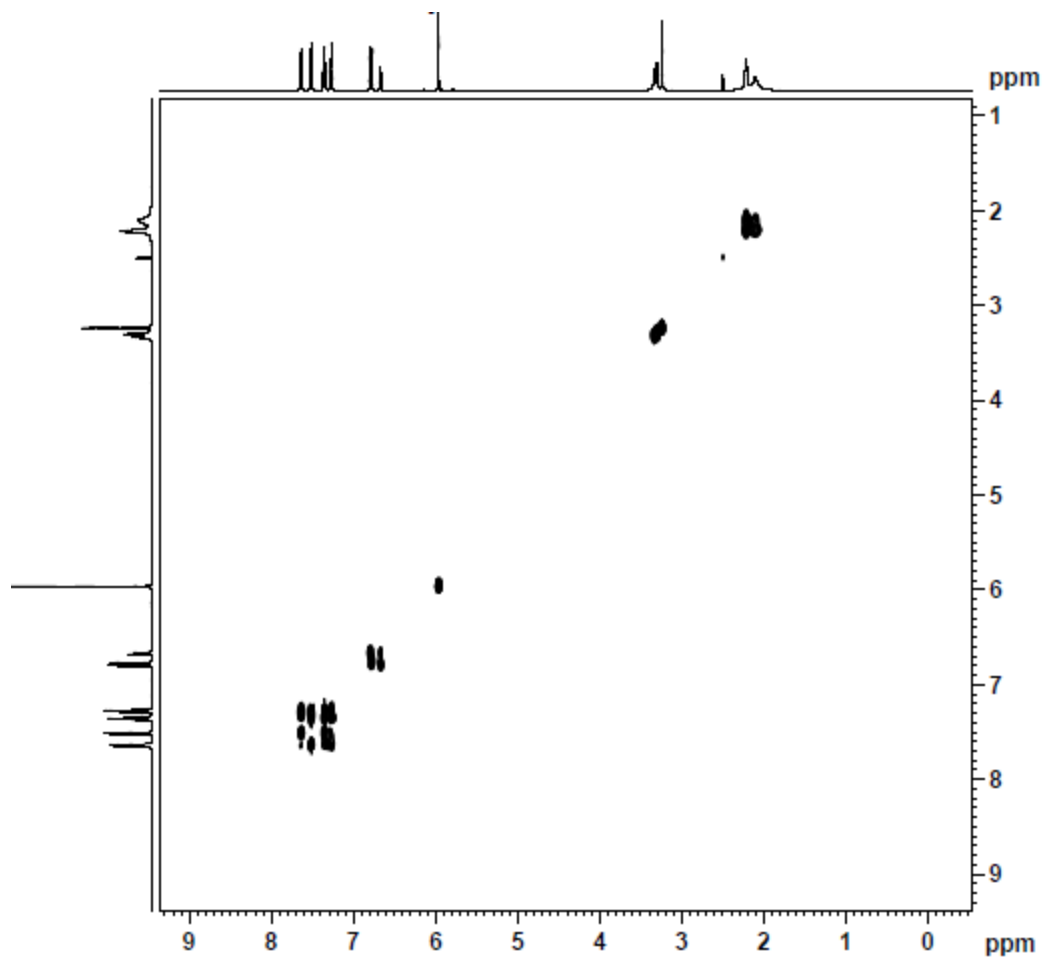

Figure 38: TOCSY NMR Spectrum of FEN (500 MHz, DMSO-d<sub>6</sub>, 300K)



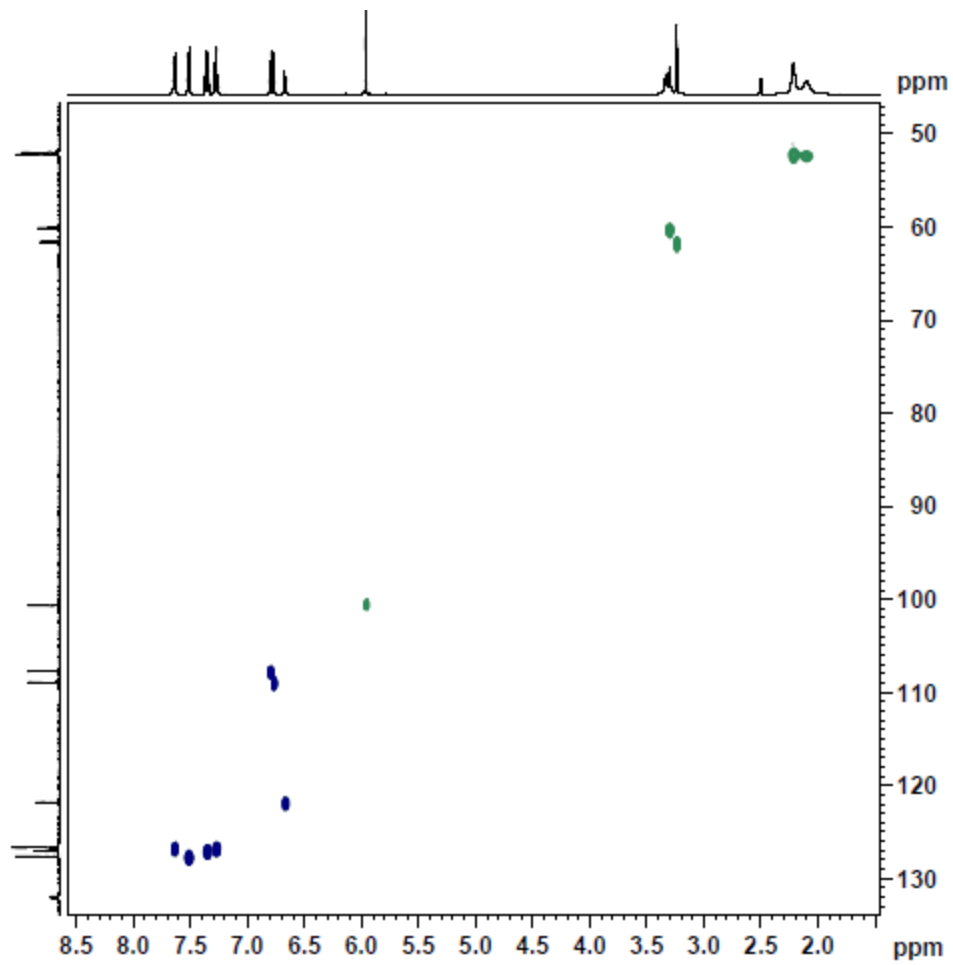

Figure 39: HSQC NMR Spectrum of FEN (500 MHz, DMSO-d<sub>6</sub>, 300K)

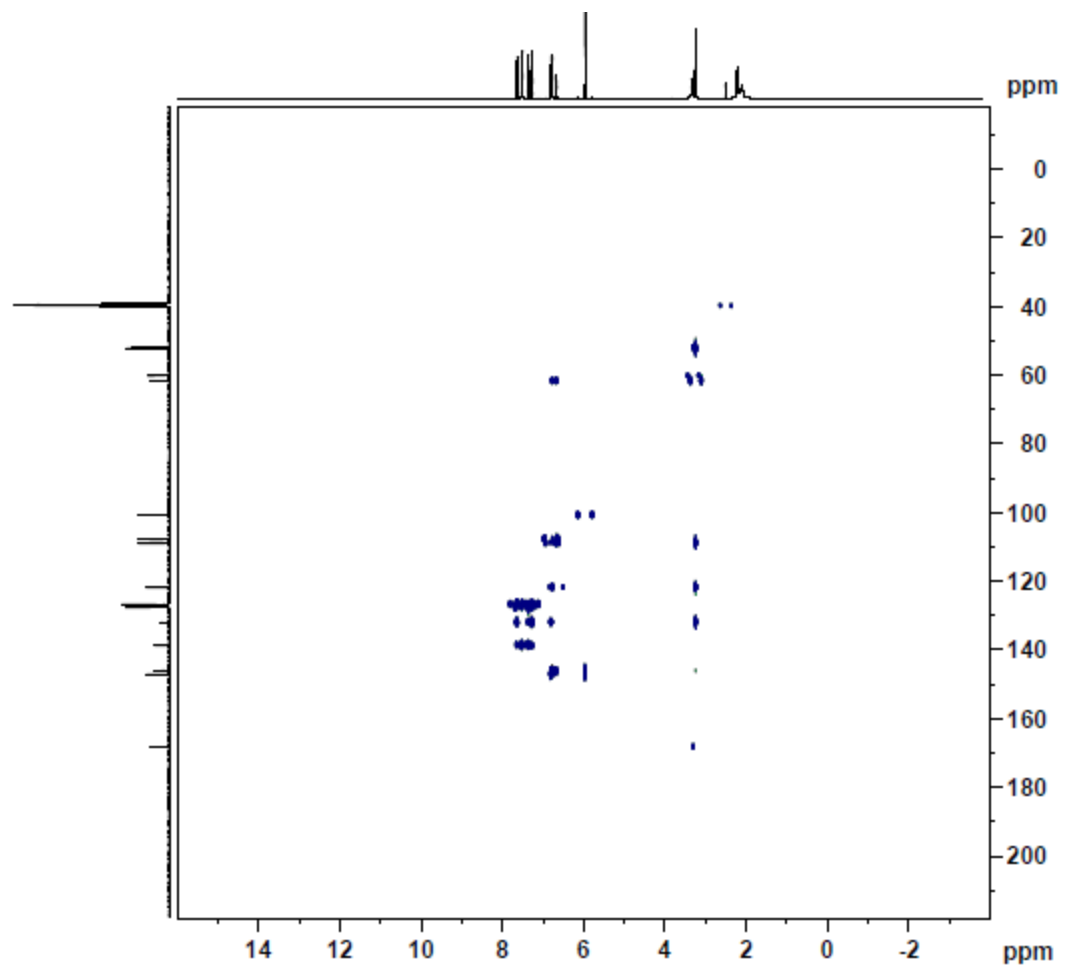

Figure 40: HMBC NMR Spectrum of FEN (500 MHz, DMSO-d<sub>6</sub>, 300K)

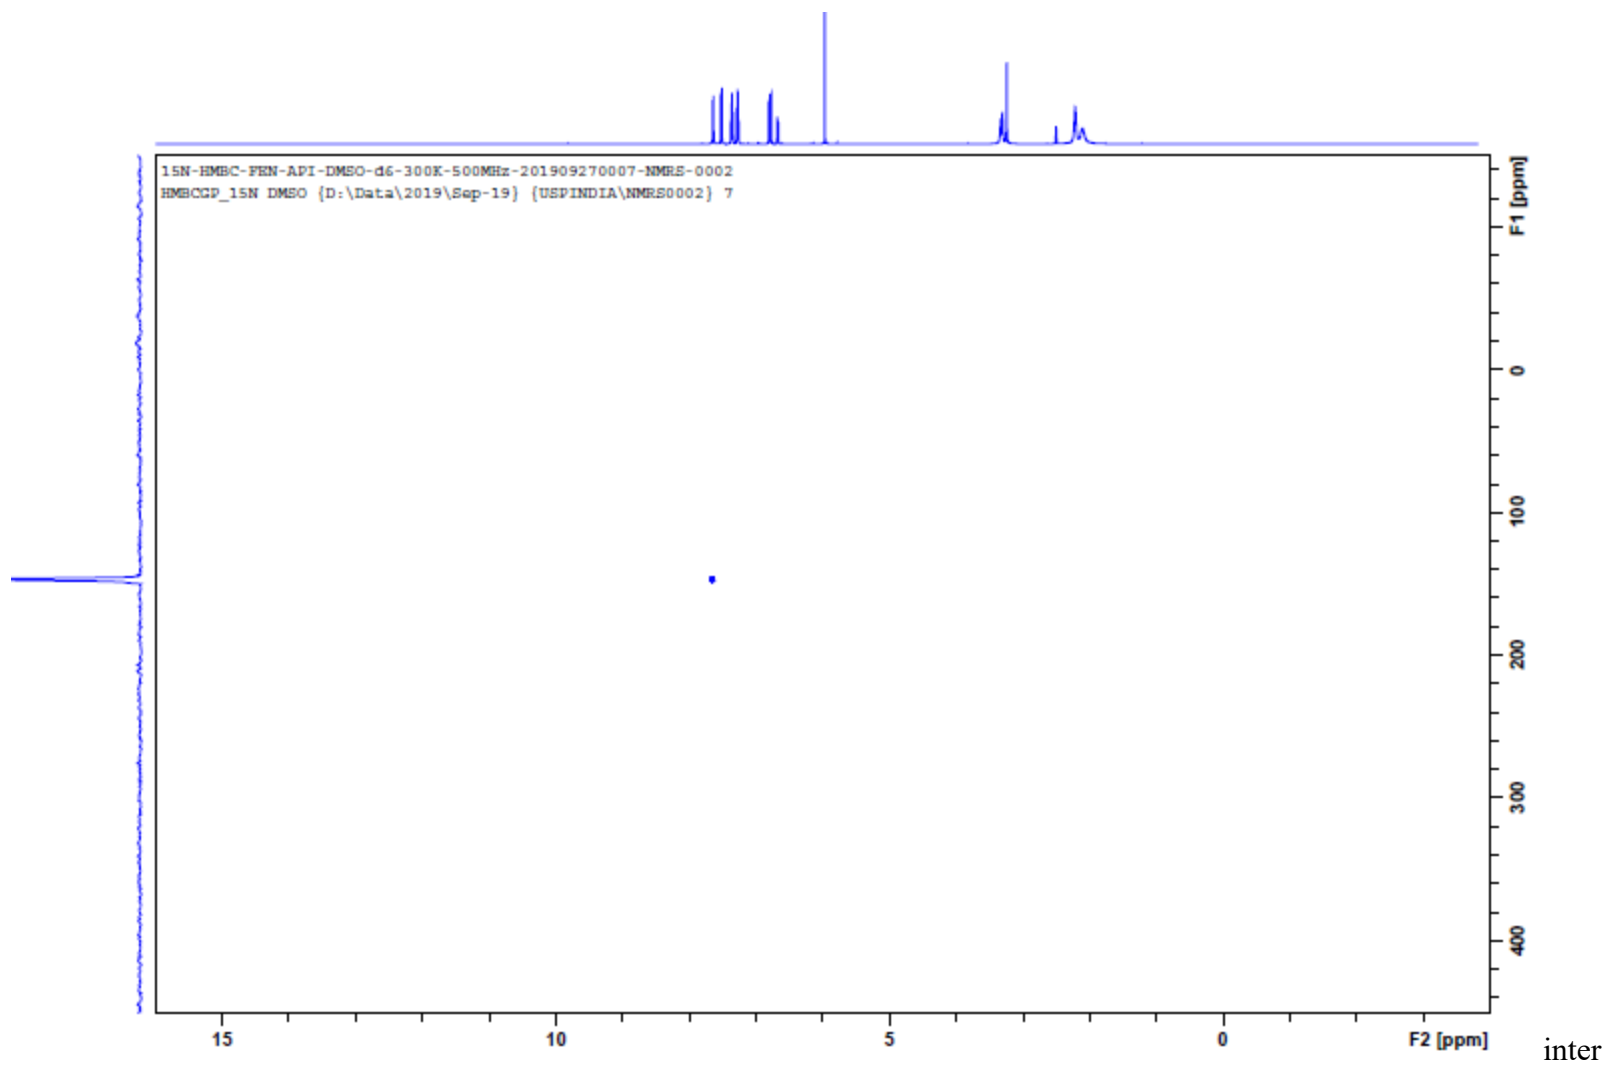

Figure 41:  $^{15}\text{N}$ -HMBC NMR Spectrum of FEN (500 MHz, DMSO-d<sub>6</sub>, 300K)

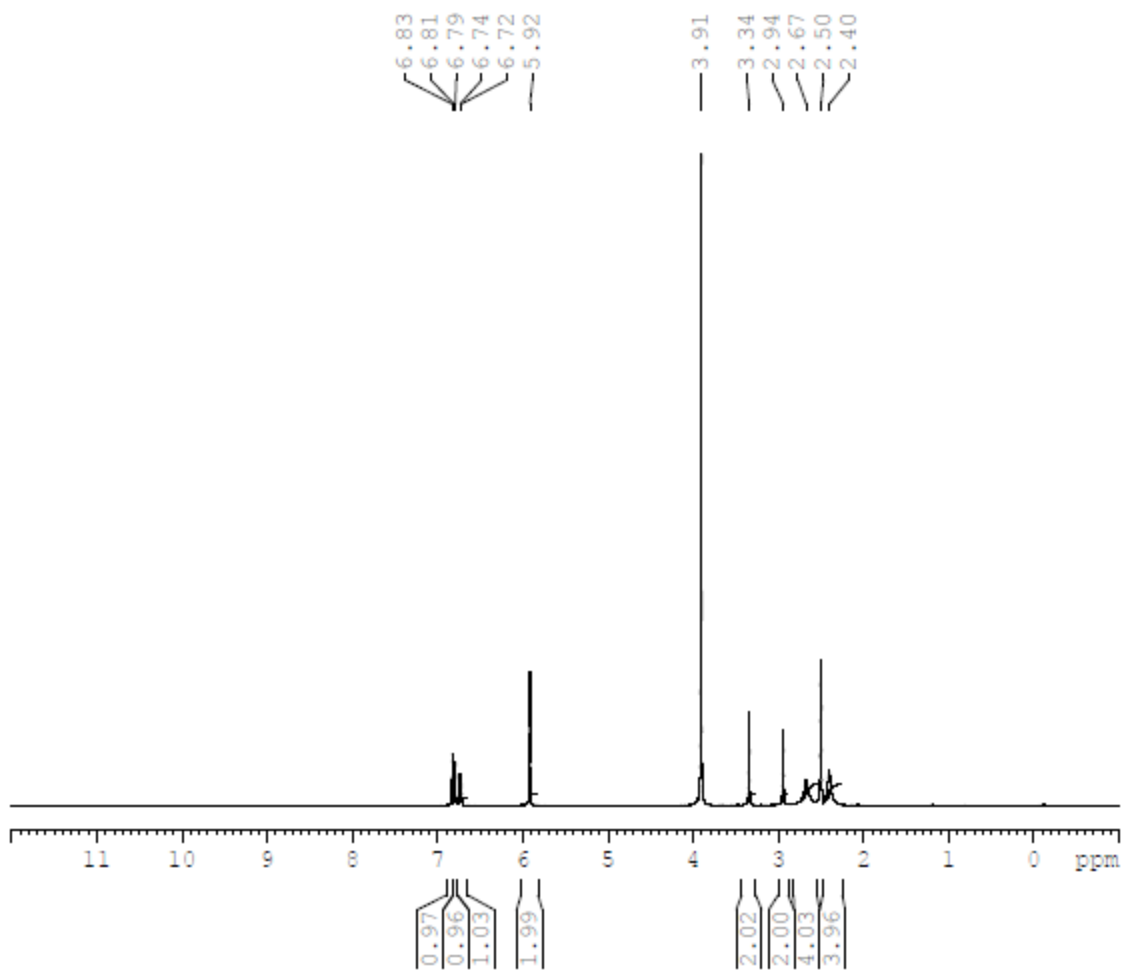

Figure 42:  $^1\text{H}$  NMR Spectrum of FAD1 (500 MHz,  $\text{DMSO-}d_6$ , 300K)

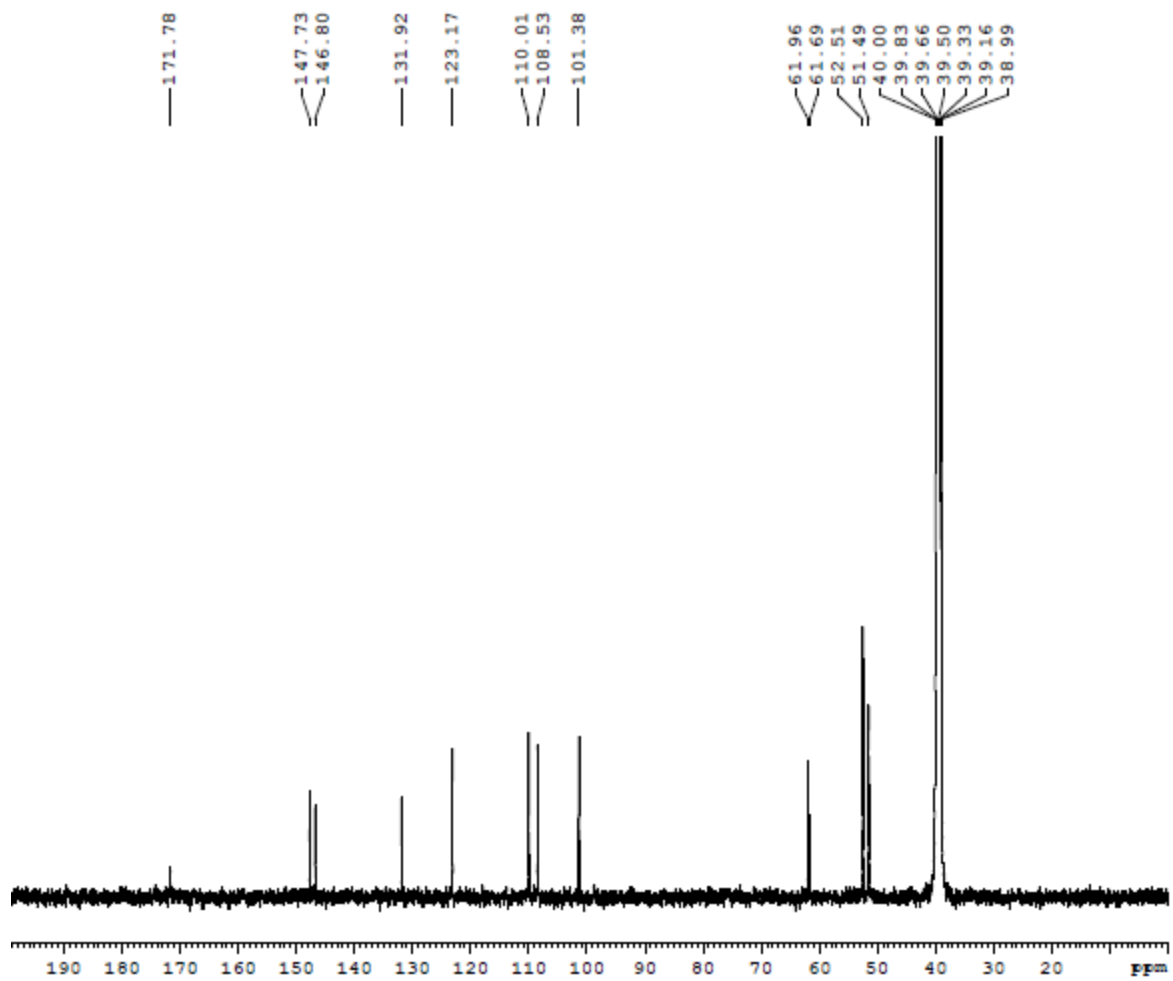

Figure 43:  $^{13}\text{C}$  NMR Spectrum of FAD1 (126 MHz, DMSO- $d_6$ , 300K)

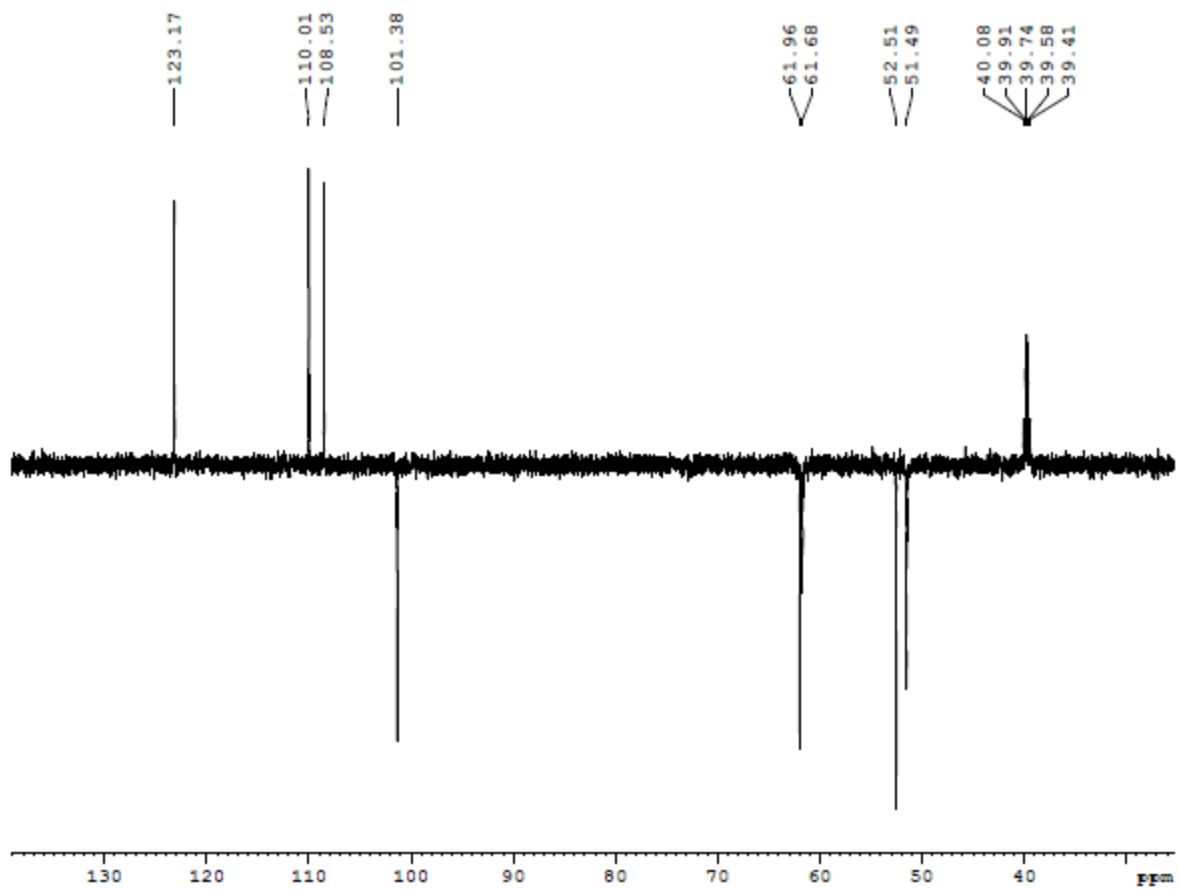

Figure 44: DEPT135 NMR Spectrum of CD1 (126 MHz, DMSO-d6, 300K)

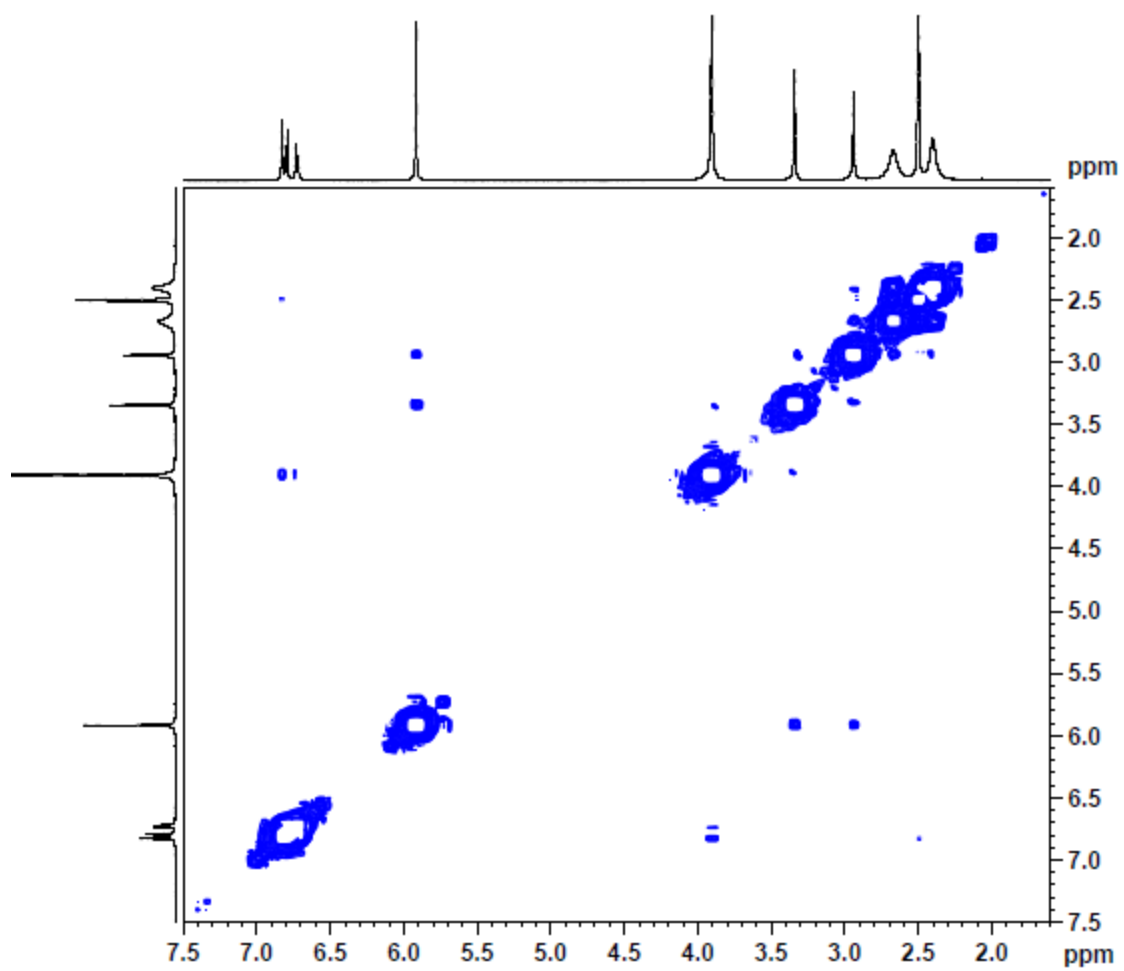

Figure 45: COSY NMR Spectrum of FAD1 (500 MHz, DMSO-d6, 300K)

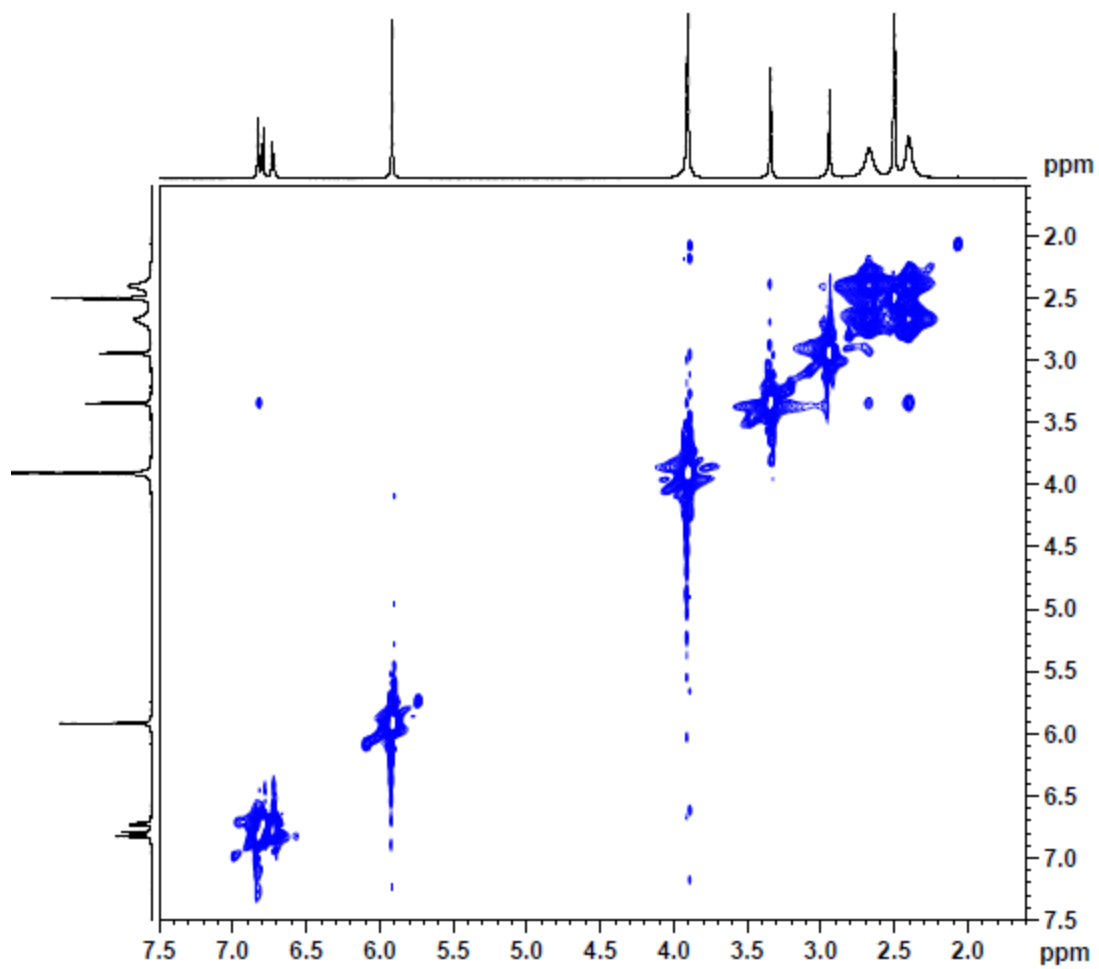

Figure 46: TOCSY NMR Spectrum of FAD1 (500 MHz, DMSO-d<sub>6</sub>, 300K)



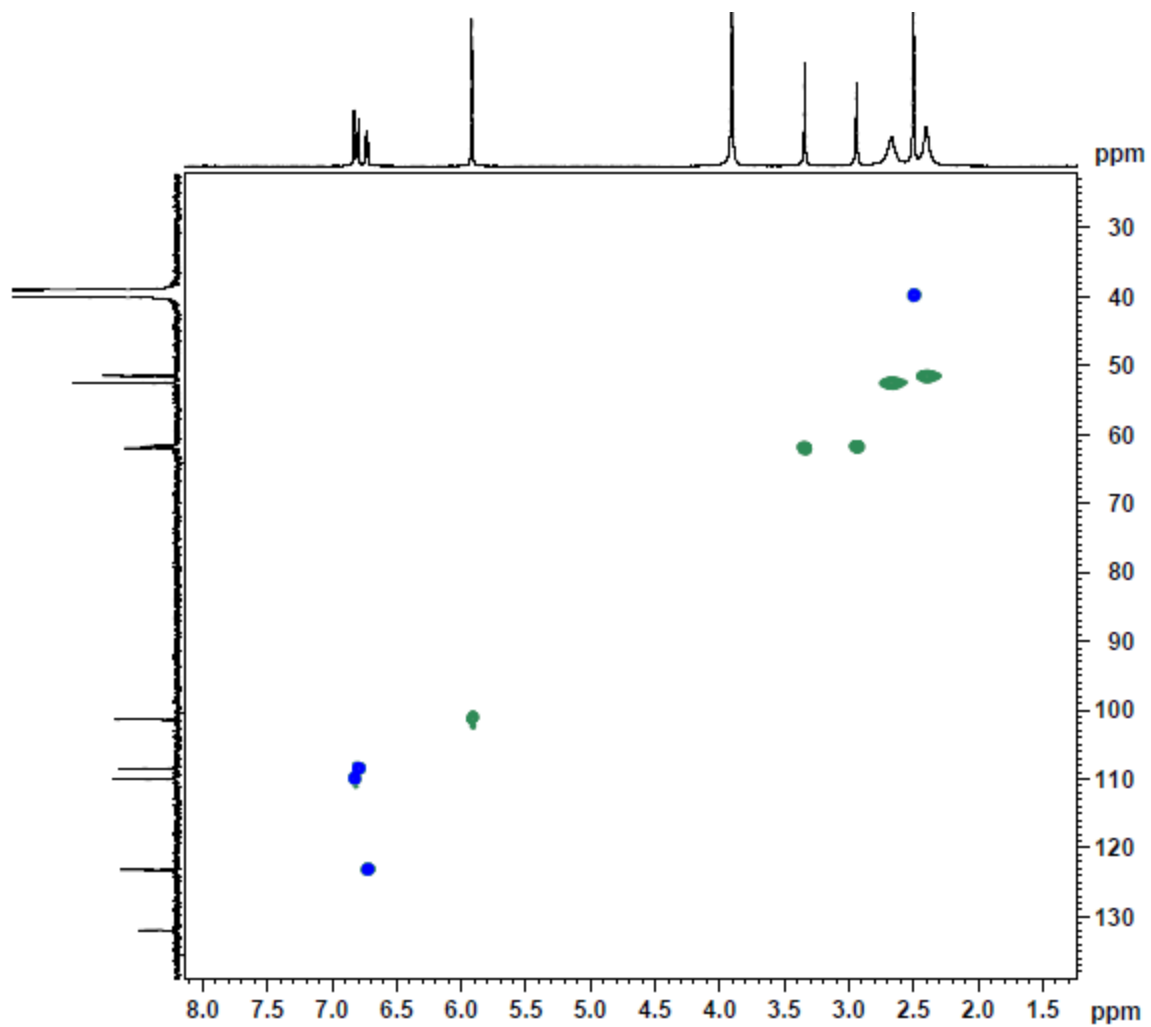

Figure 47: HSQC NMR Spectrum of FAD1 (500 MHz, DMSO-d<sub>6</sub>, 300K)

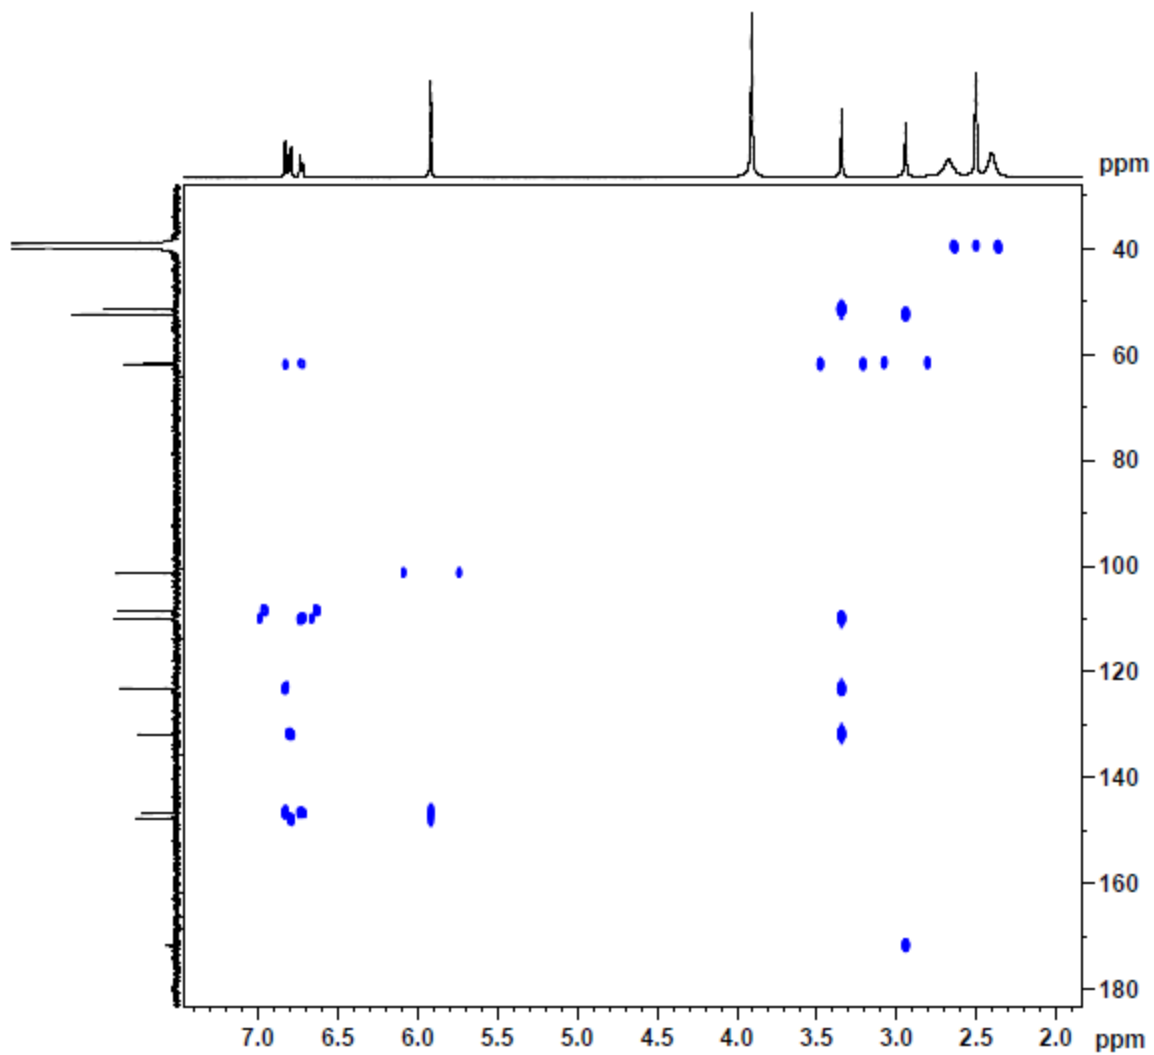

Figure 48: HMBC NMR Spectrum of FAD1 (500 MHz, DMSO-d<sub>6</sub>, 300K)

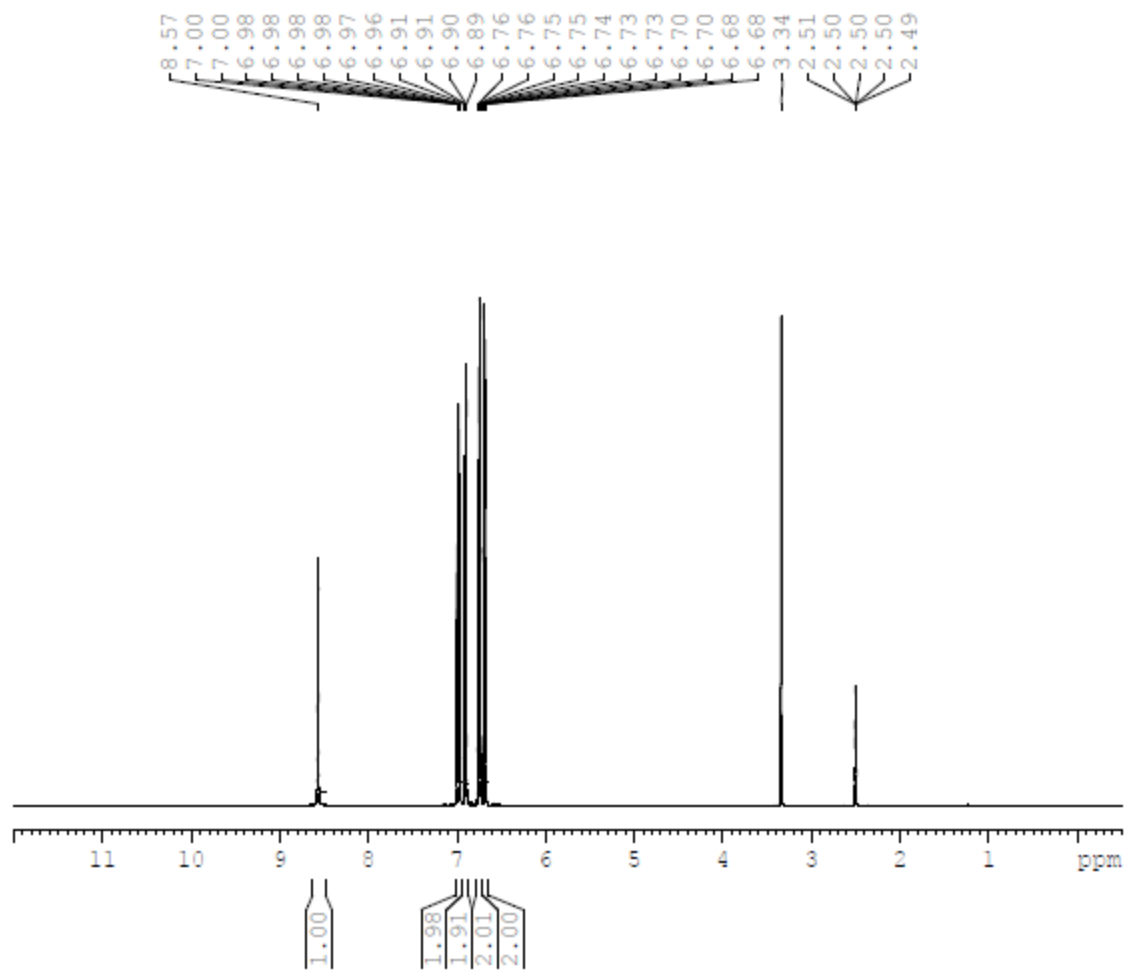

Figure 49:  $^1\text{H}$  NMR Spectrum of FAD2 (500 MHz,  $\text{DMSO-}d_6$ , 300K)

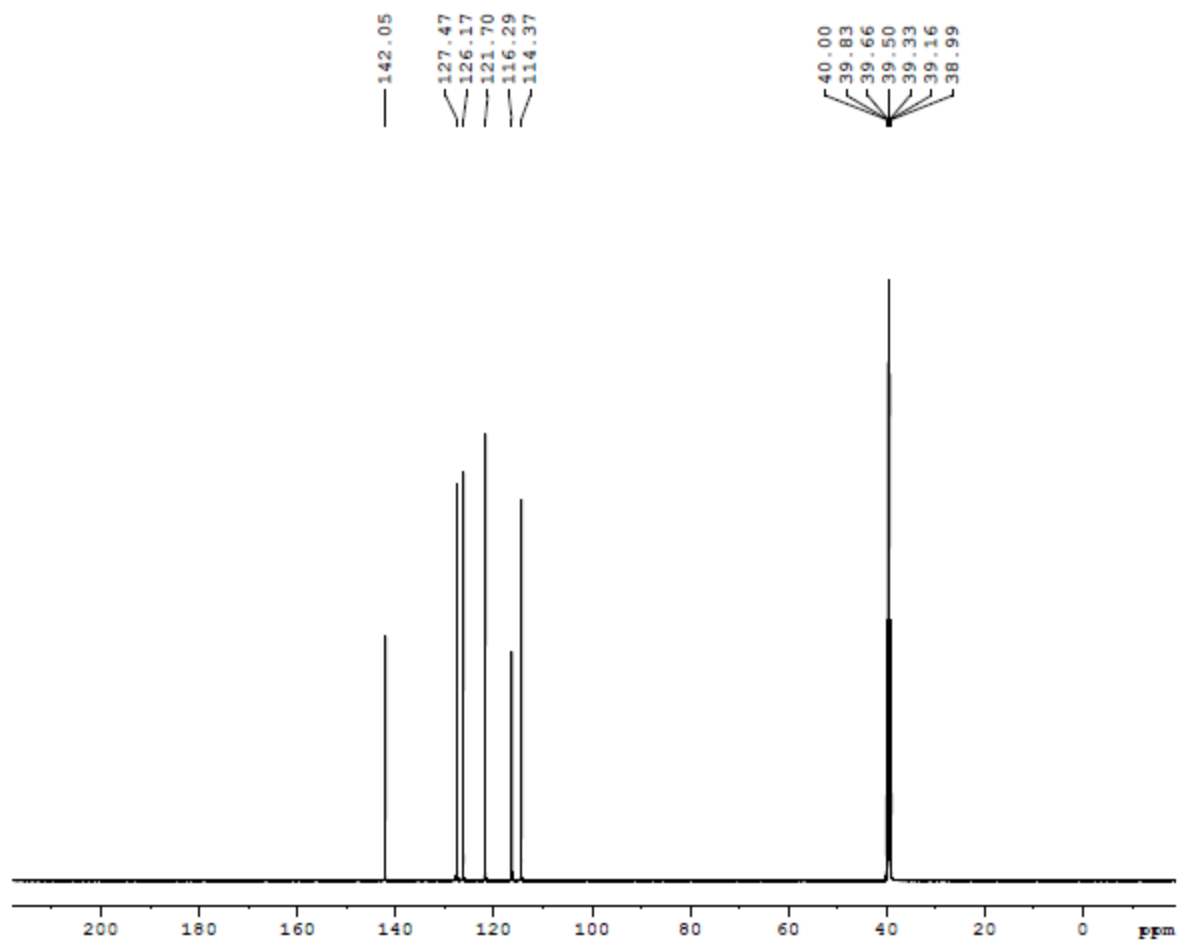

Figure 50:  $^{13}\text{C}$  NMR Spectrum of FAD2 (126 MHz, DMSO-d<sub>6</sub>, 300K)

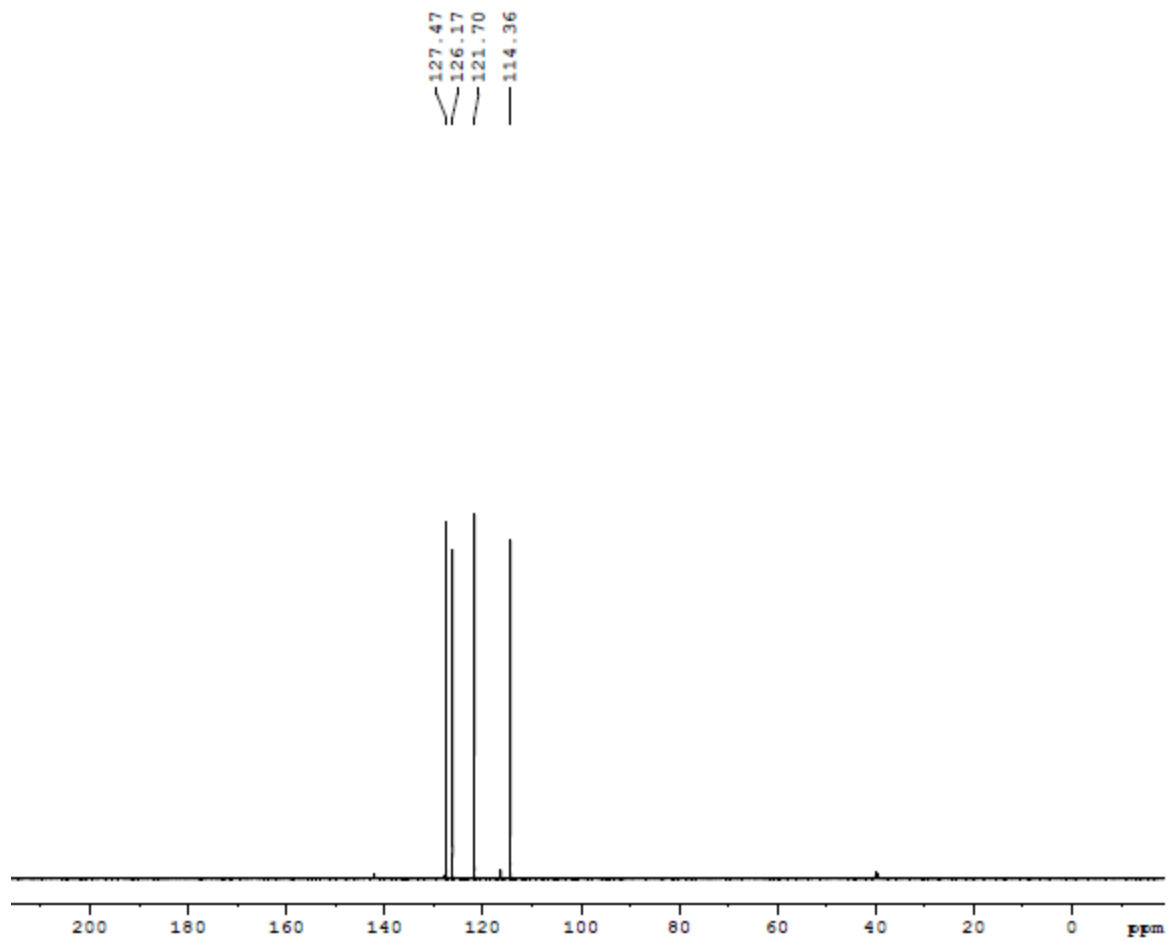

Figure 51: DEPT90 NMR Spectrum of FAD2 (126 MHz, DMSO-d6, 300K)

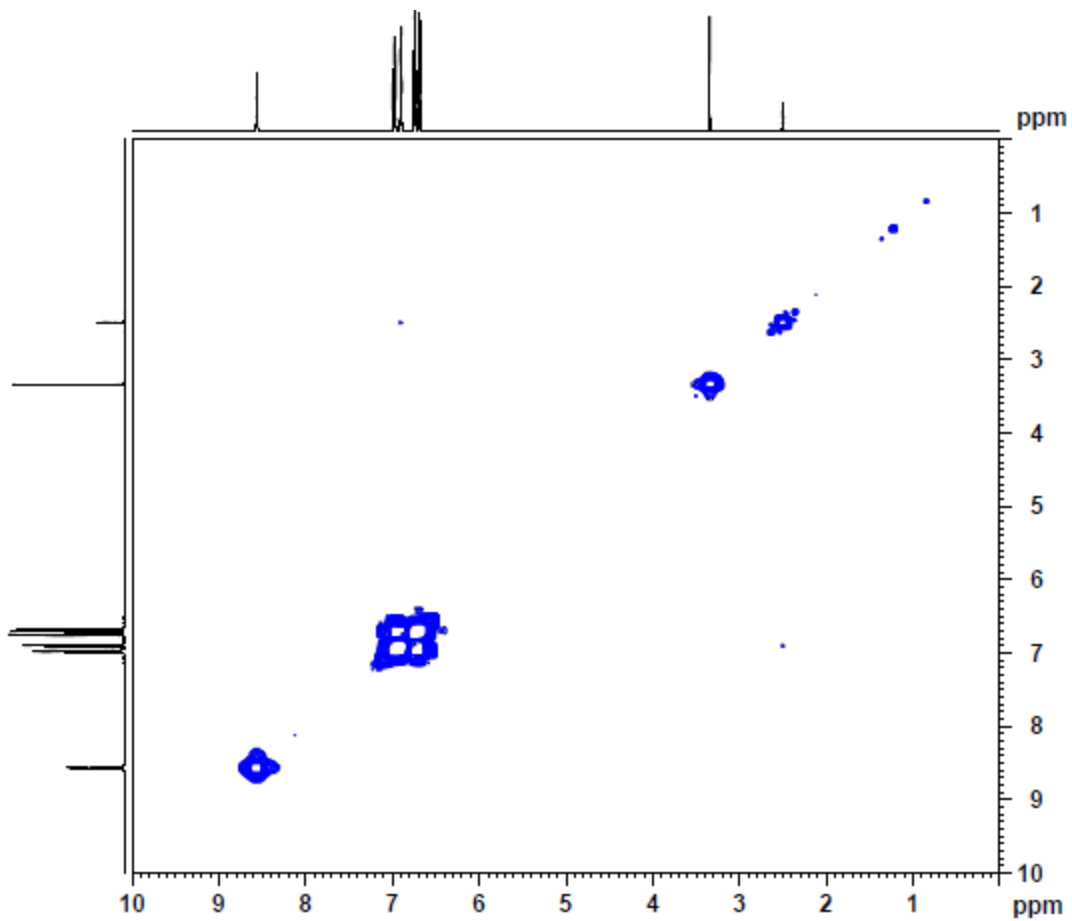

Figure 52: COSY NMR Spectrum of FAD2 (500 MHz, DMSO-d<sub>6</sub>, 300K)

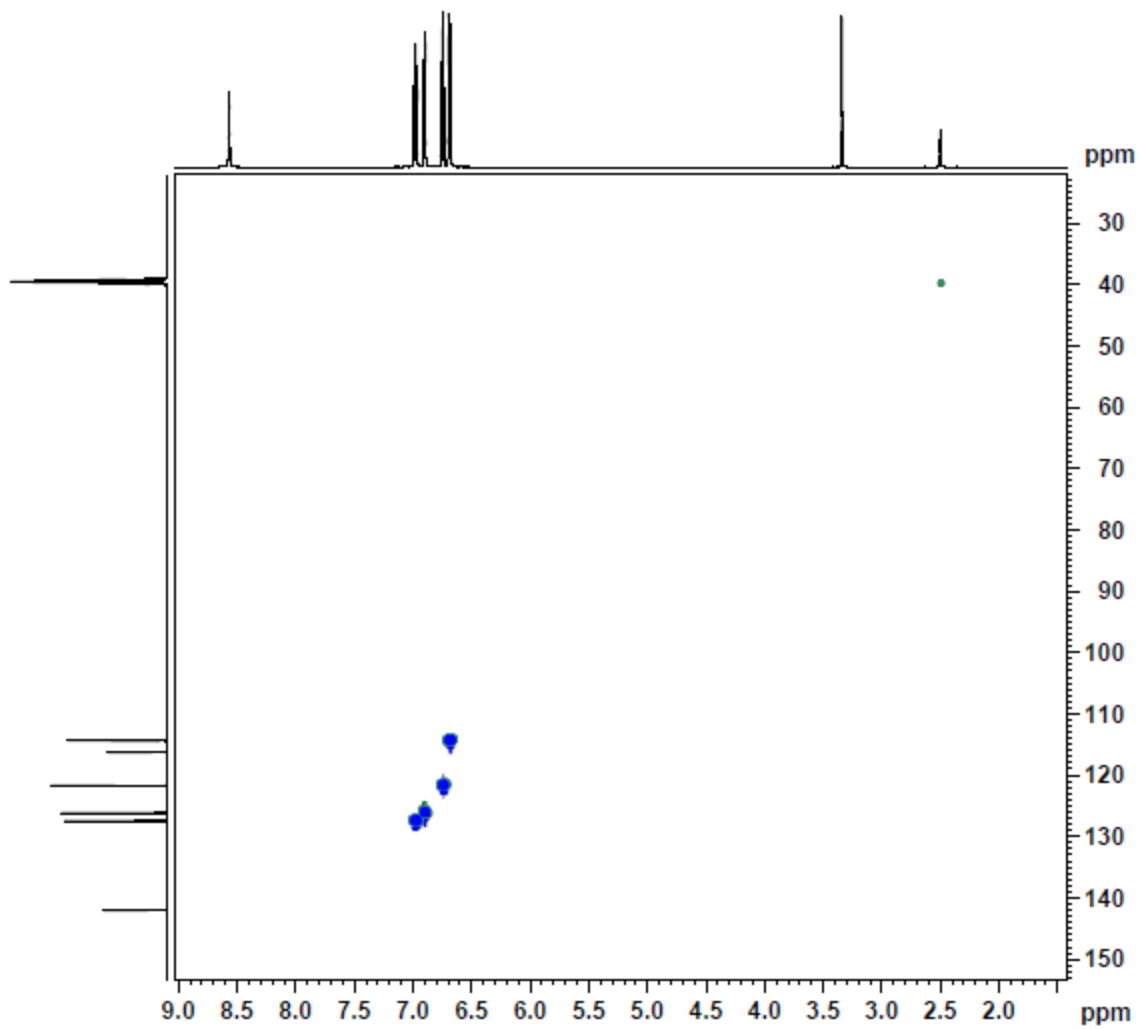

Figure 53: HSQC NMR Spectrum of FAD2 (500 MHz, DMSO-d6, 300K)

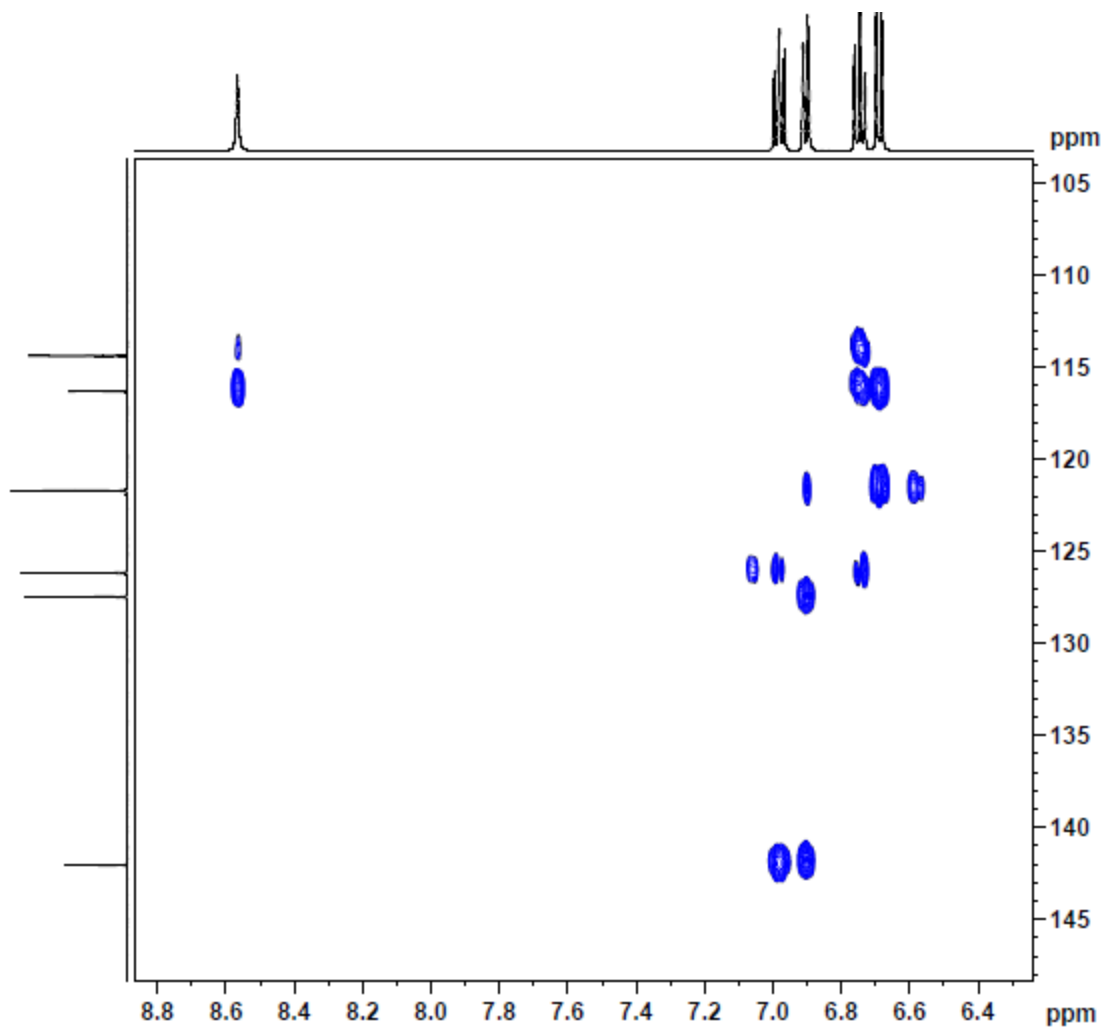

Figure 54: HMBC NMR Spectrum of FAD2 (500 MHz, DMSO-d<sub>6</sub>, 300K)



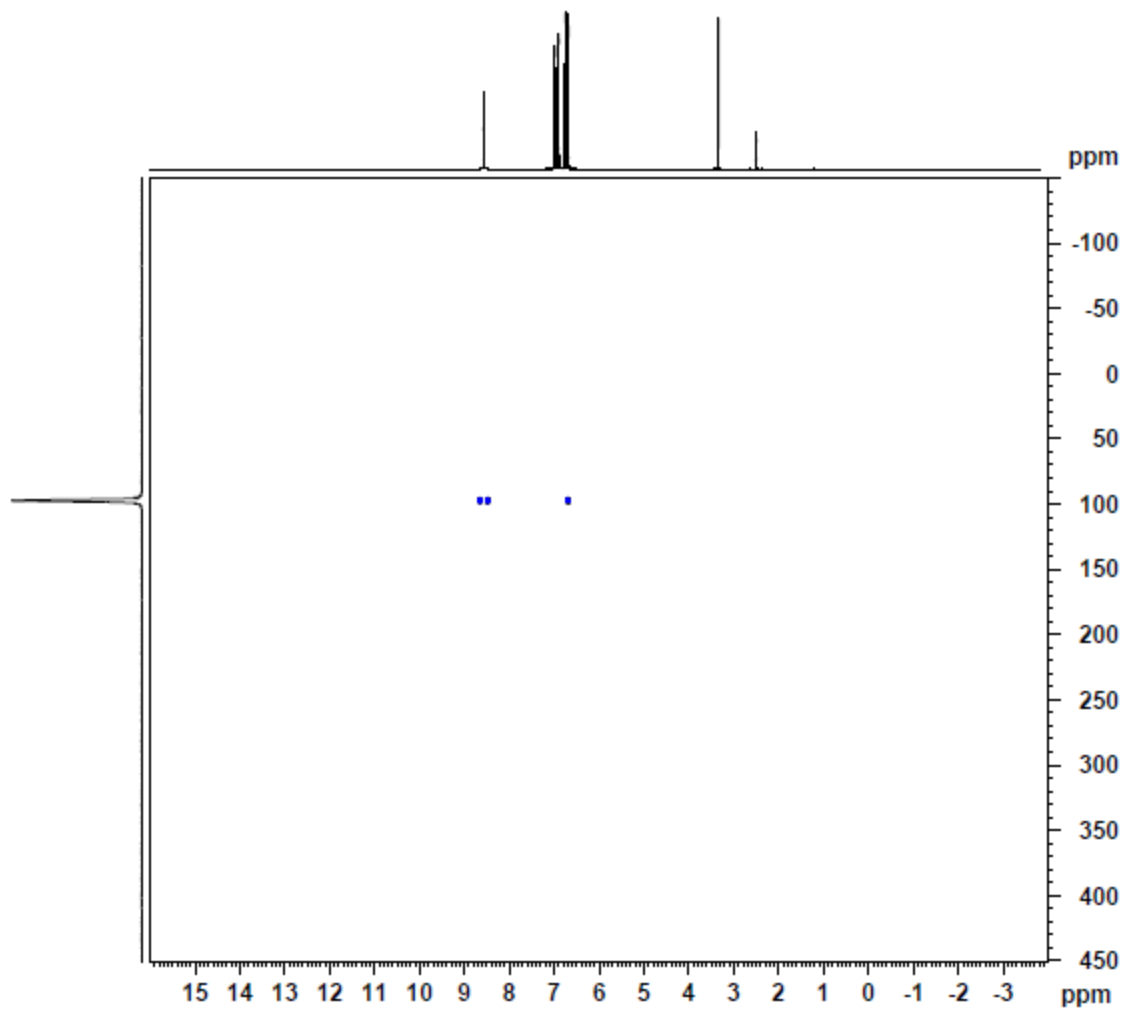

Figure 55:  $^{15}\text{N}$ -HMBC NMR Spectrum of FAD2 (500 MHz, DMSO- $d_6$ , 300K)

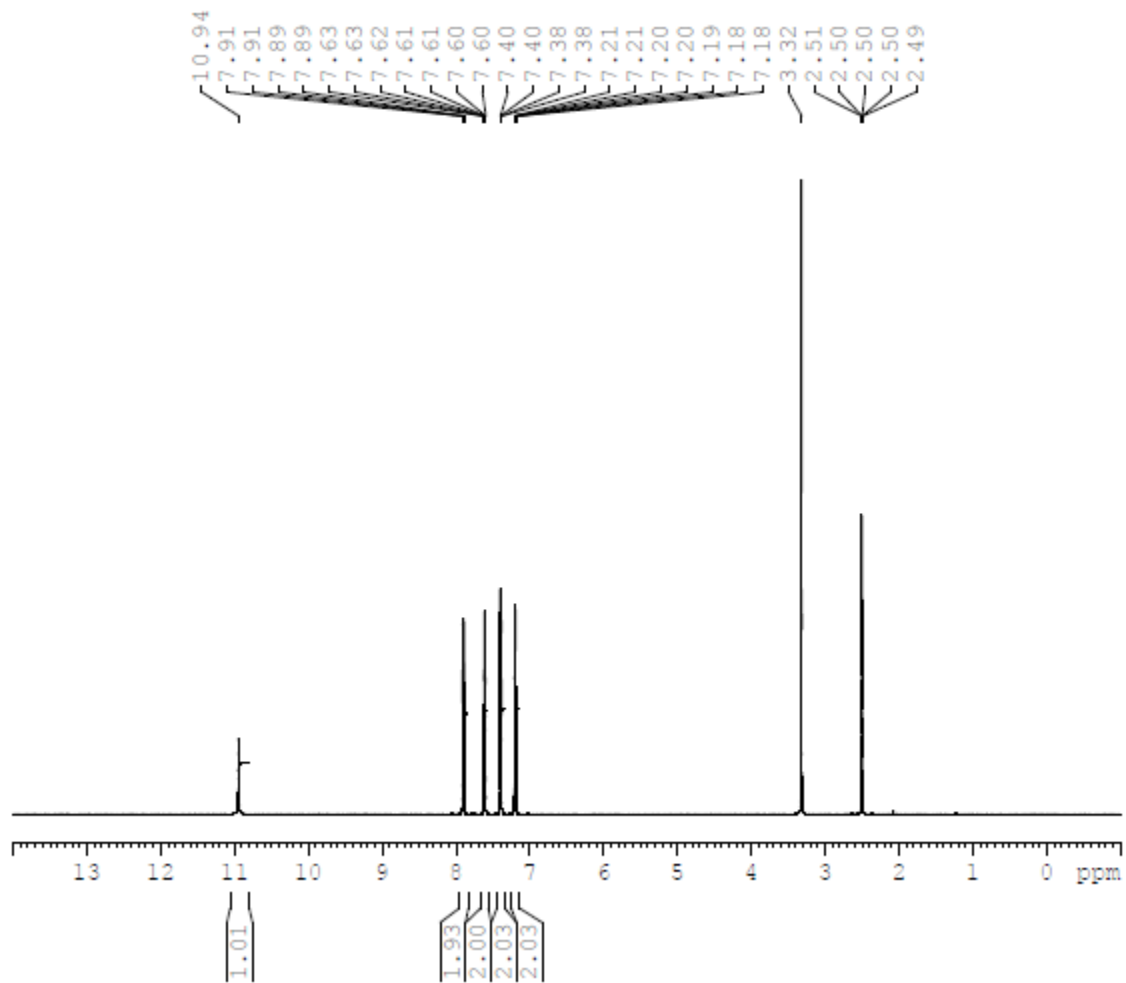

Figure 56: <sup>1</sup>H NMR Spectrum of FOD1 (500 MHz, DMSO-*d*<sub>6</sub>, 300K)

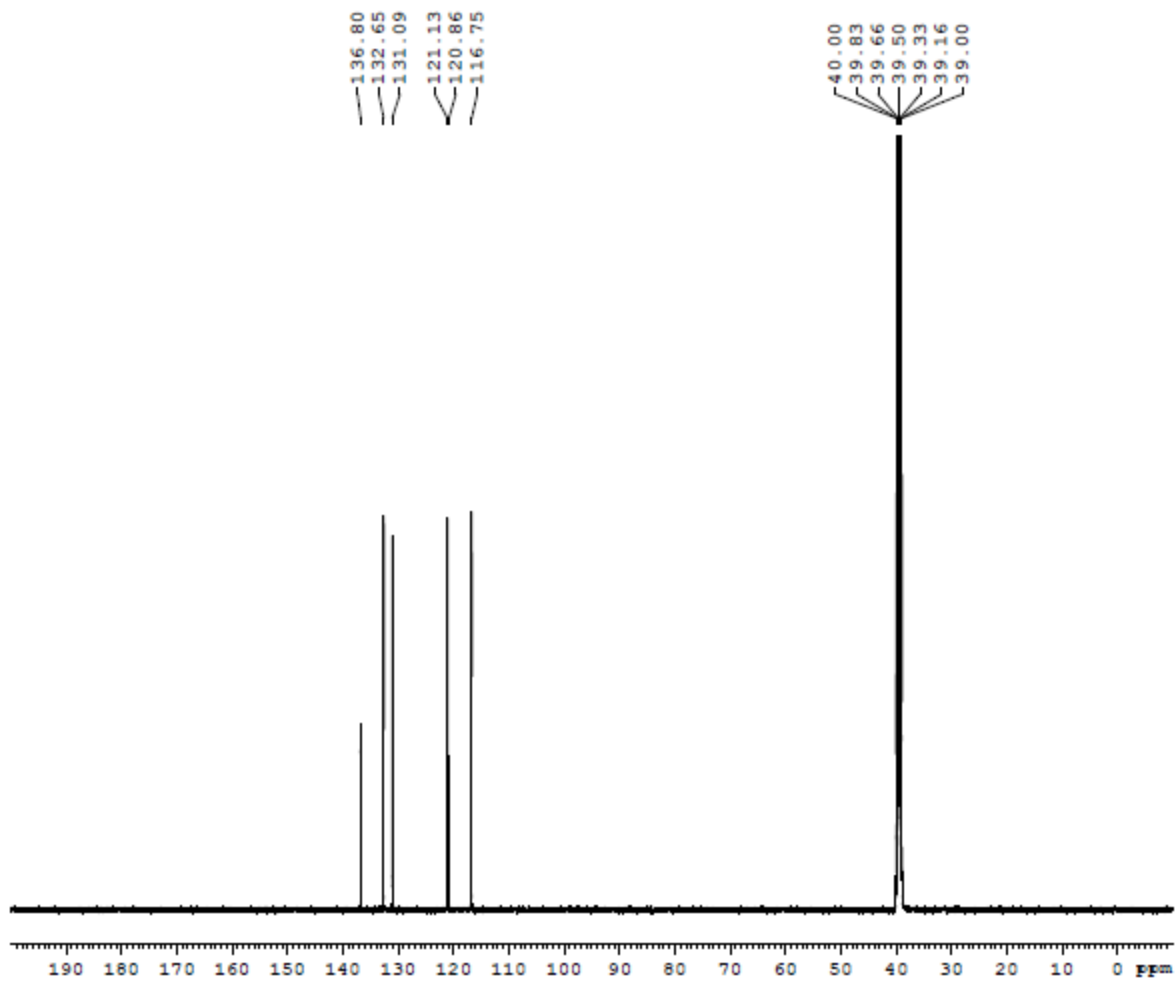

Figure 57: <sup>13</sup>C NMR Spectrum of FOD1 (126 MHz, DMSO-d<sub>6</sub>, 300K)

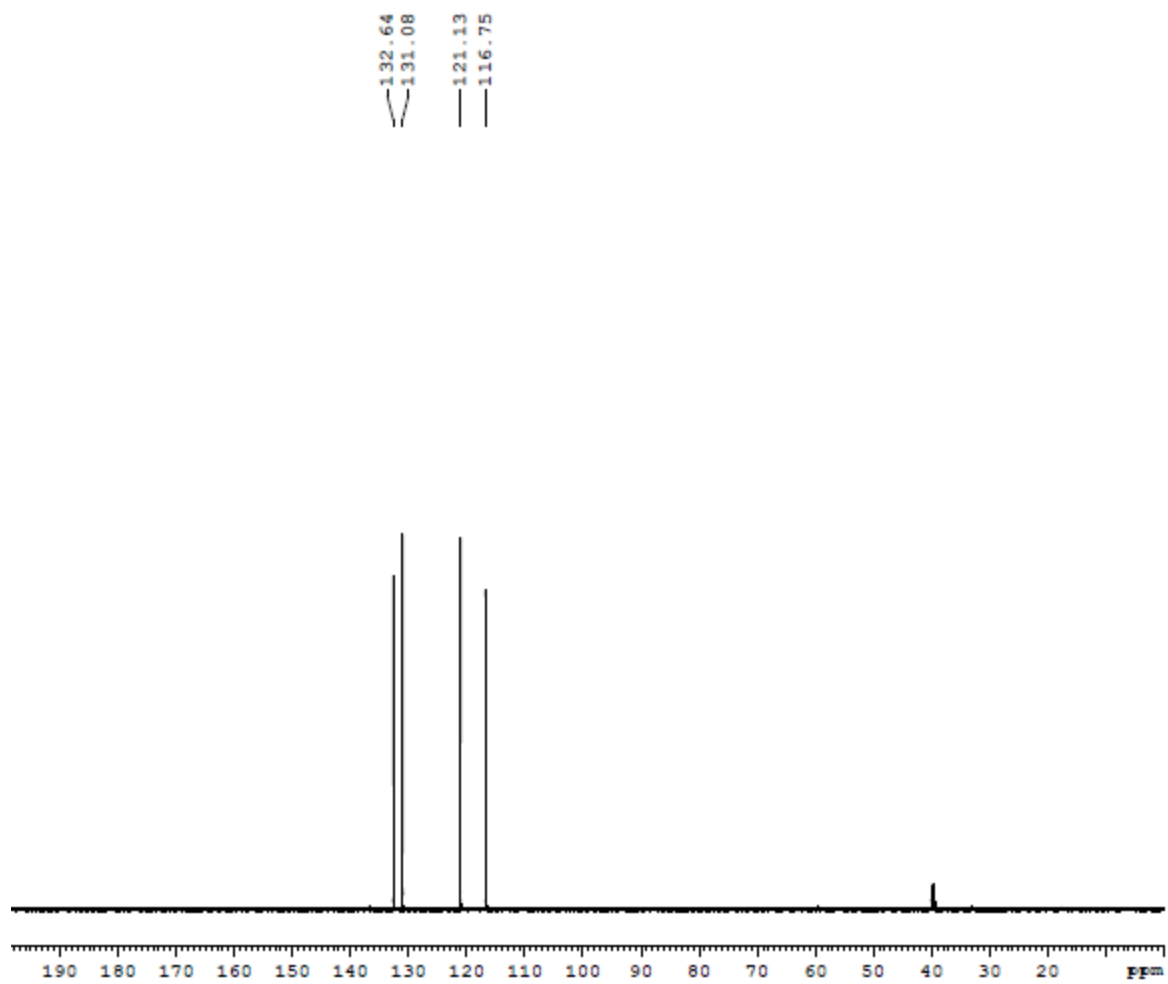

Figure 58: DEPT90 NMR Spectrum of FOD1 (126 MHz, DMSO-d<sub>6</sub>, 300K)

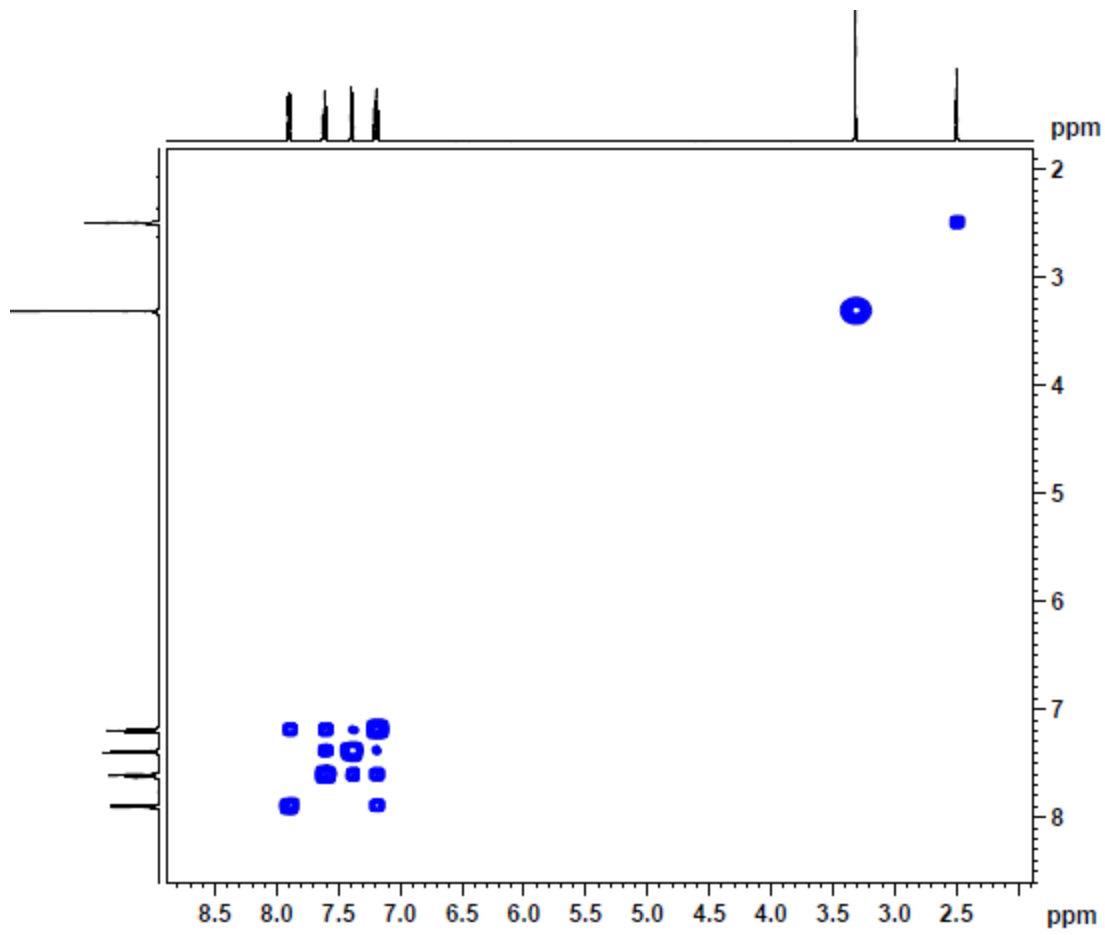

Figure 59: COSY NMR Spectrum of FOD1 (500 MHz, DMSO-d<sub>6</sub>, 300K)

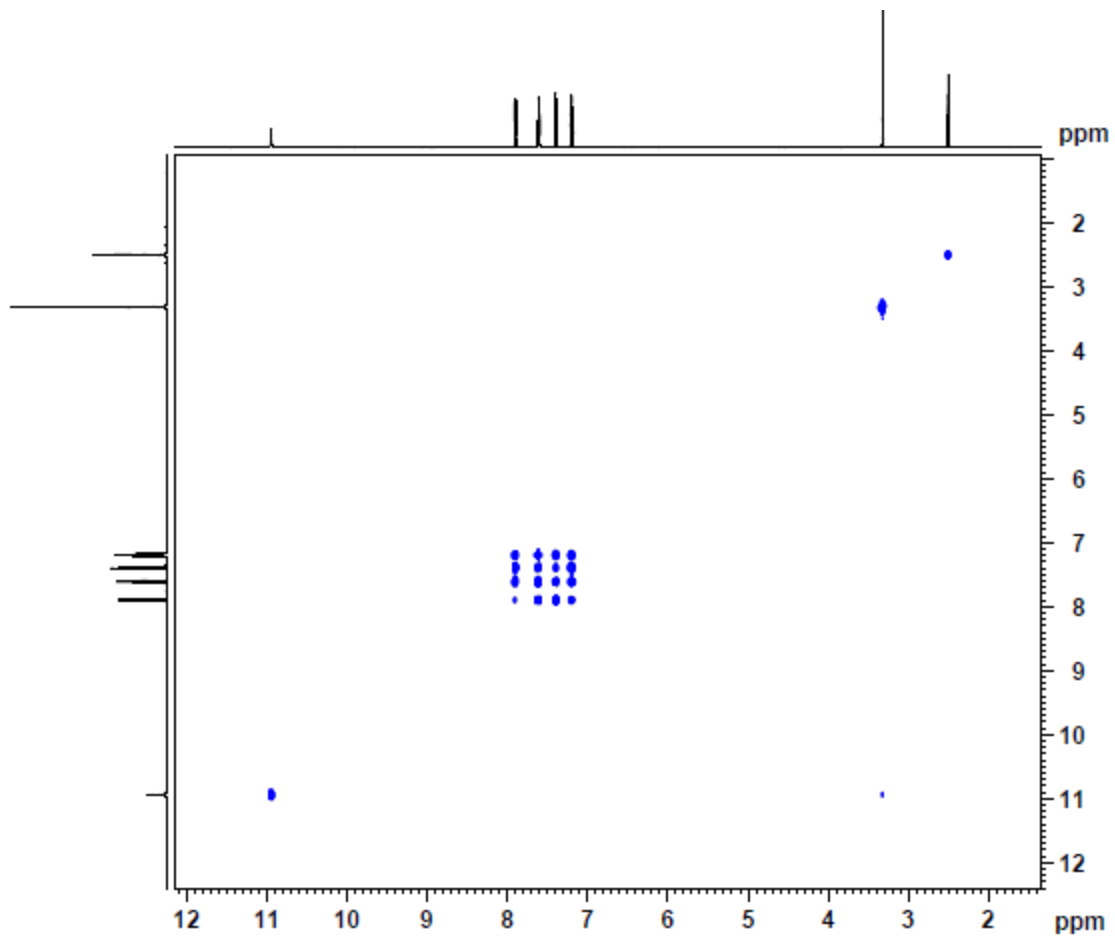

Figure 60: TOCSY NMR Spectrum of FOD1 (500 MHz, DMSO-d<sub>6</sub>, 300K)

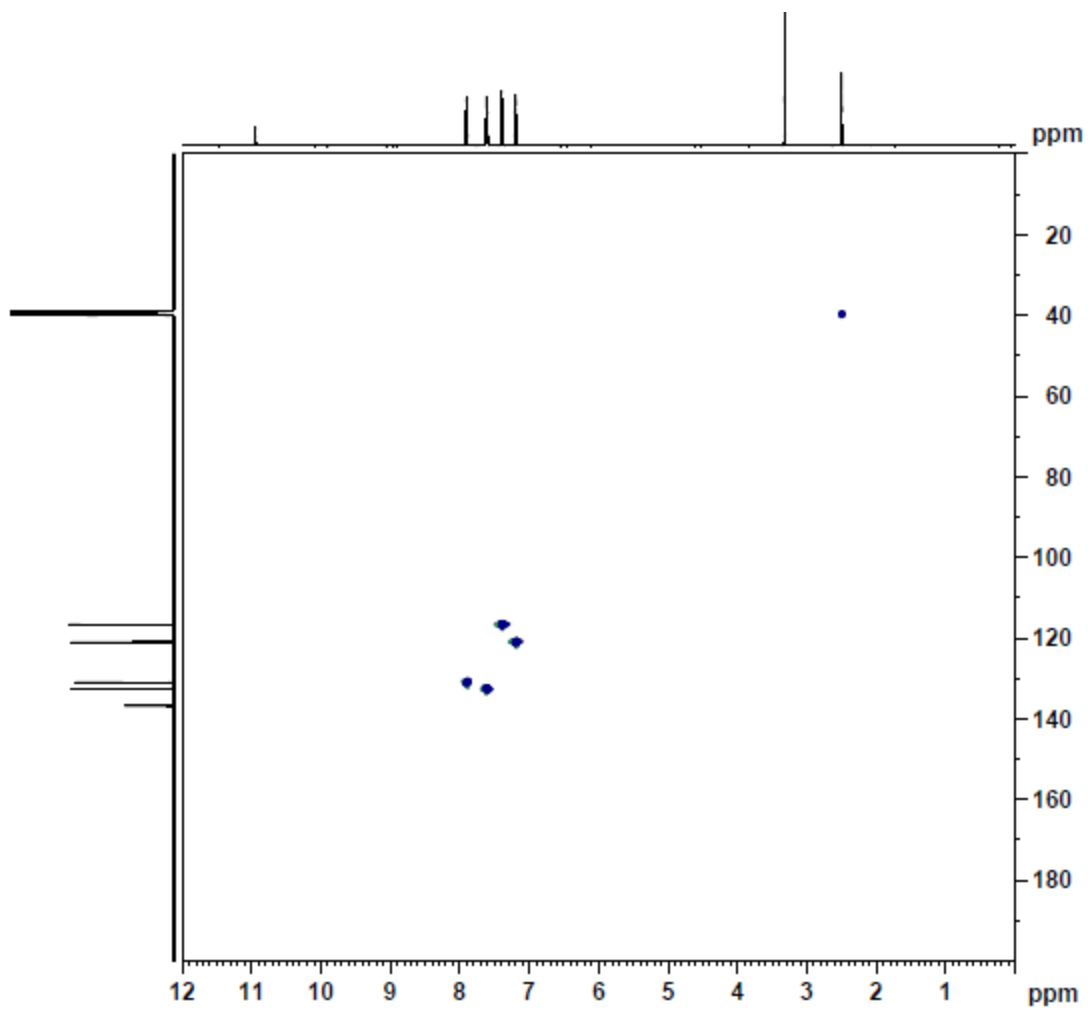

Figure 61: HSQC NMR Spectrum of FOD1 (500 MHz, DMSO-d<sub>6</sub>, 300K)

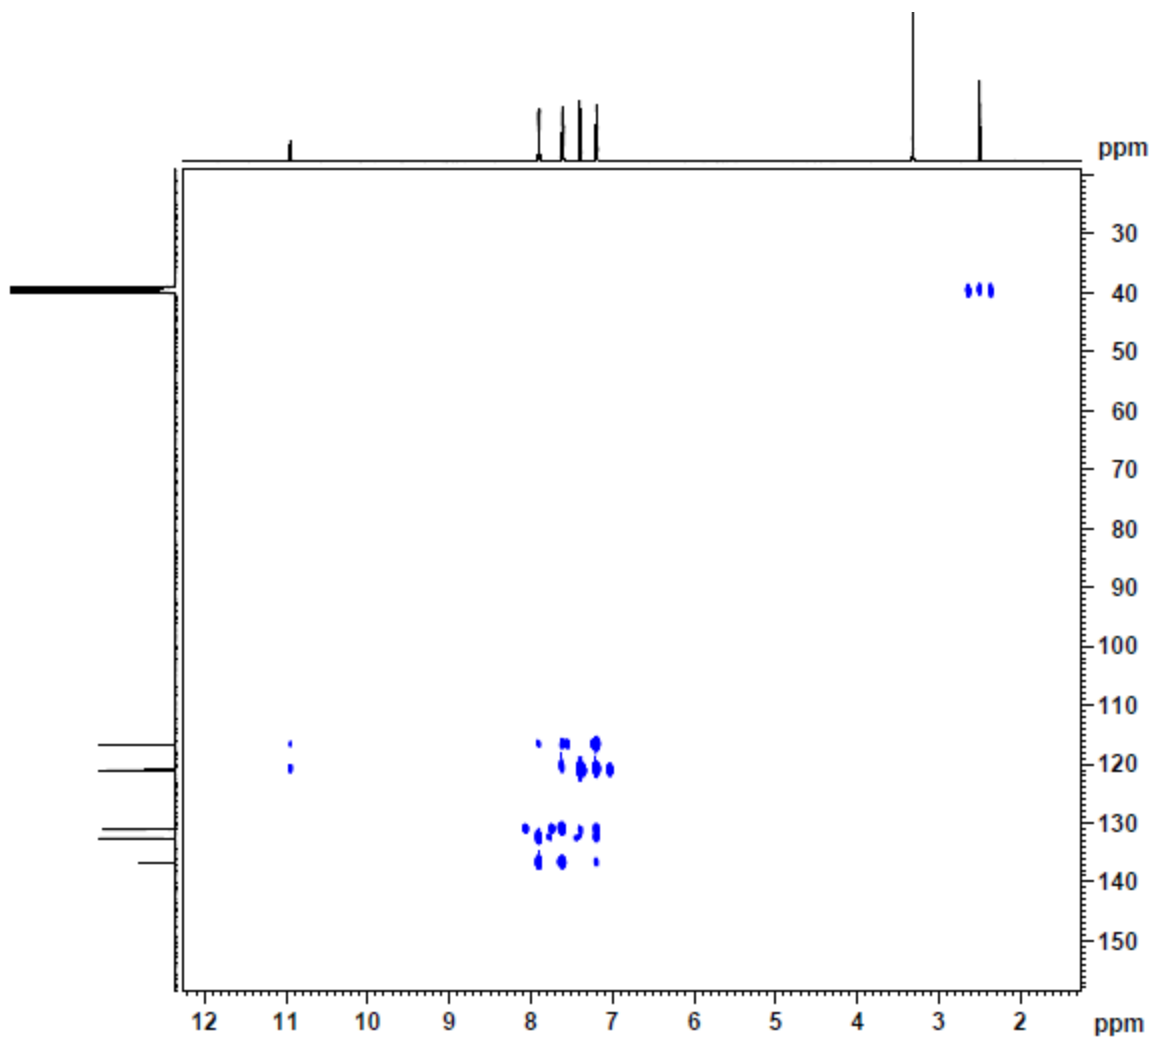

Figure 62: HMBC NMR Spectrum of FOD1 (500 MHz, DMSO-d<sub>6</sub>, 300K)



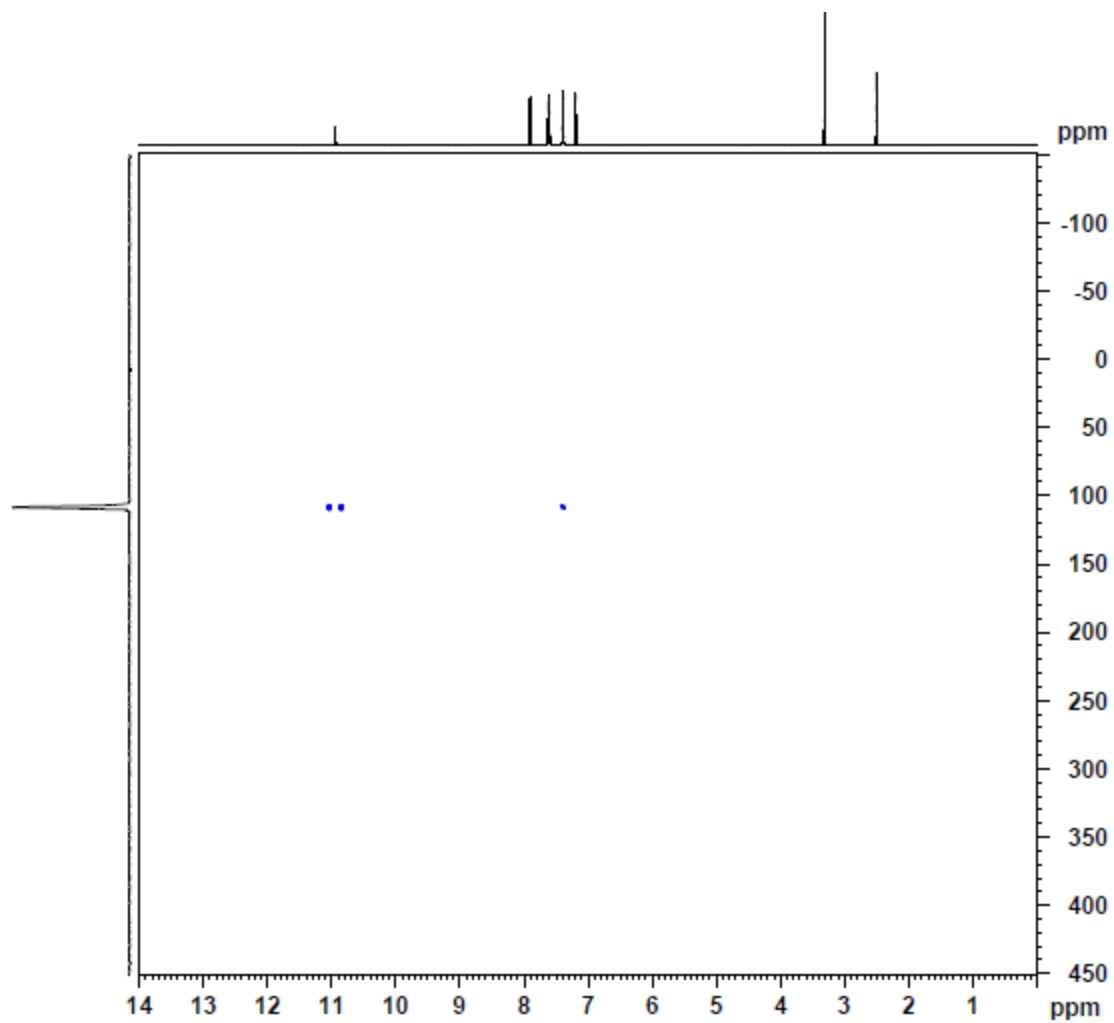

Figure 63:  $^{15}\text{N}$ -HMBC NMR Spectrum of FOD1 (500 MHz, DMSO- $d_6$ , 300K)

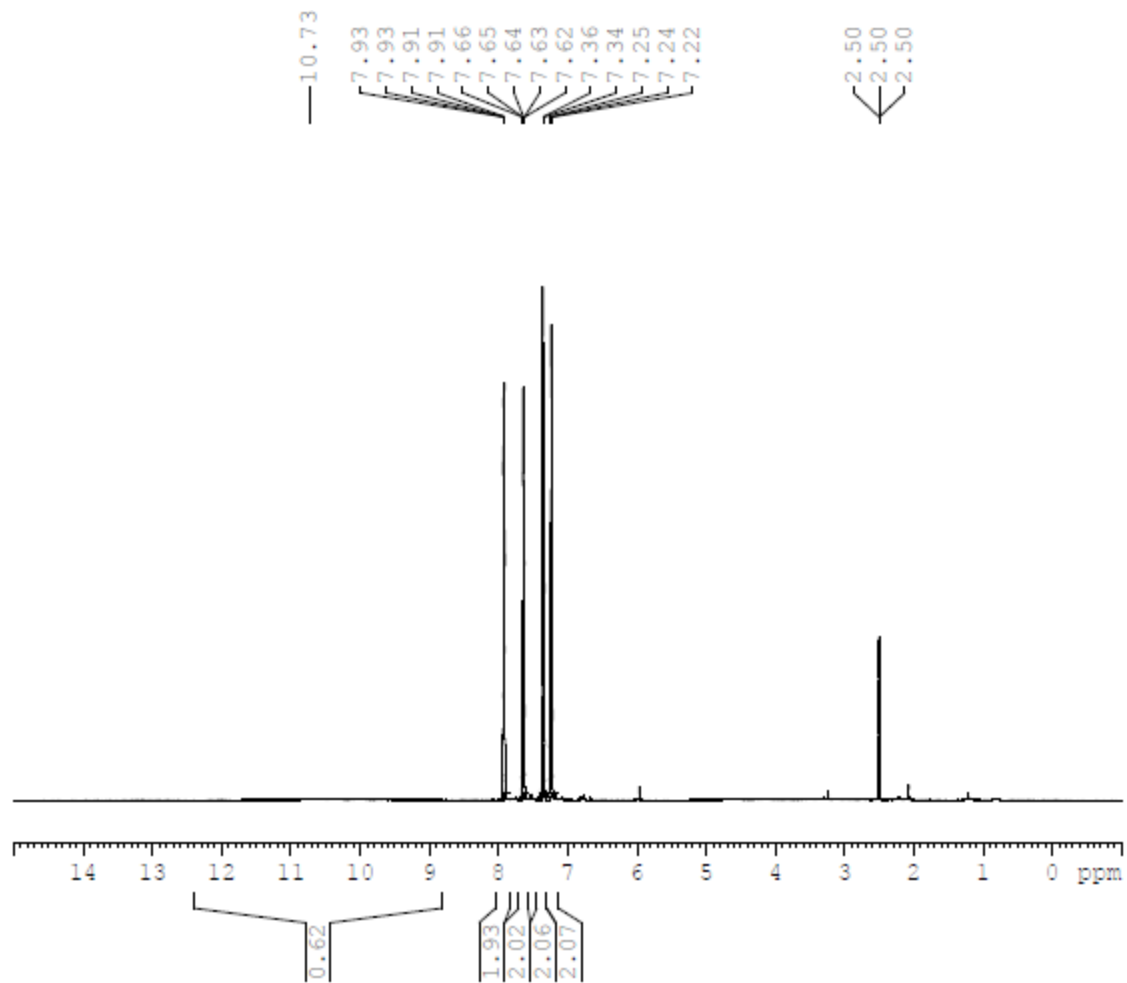

Figure 64:  $^1\text{H}$  NMR Spectrum of FOD2 (500 MHz,  $\text{DMSO-}d_6$ , 300K)

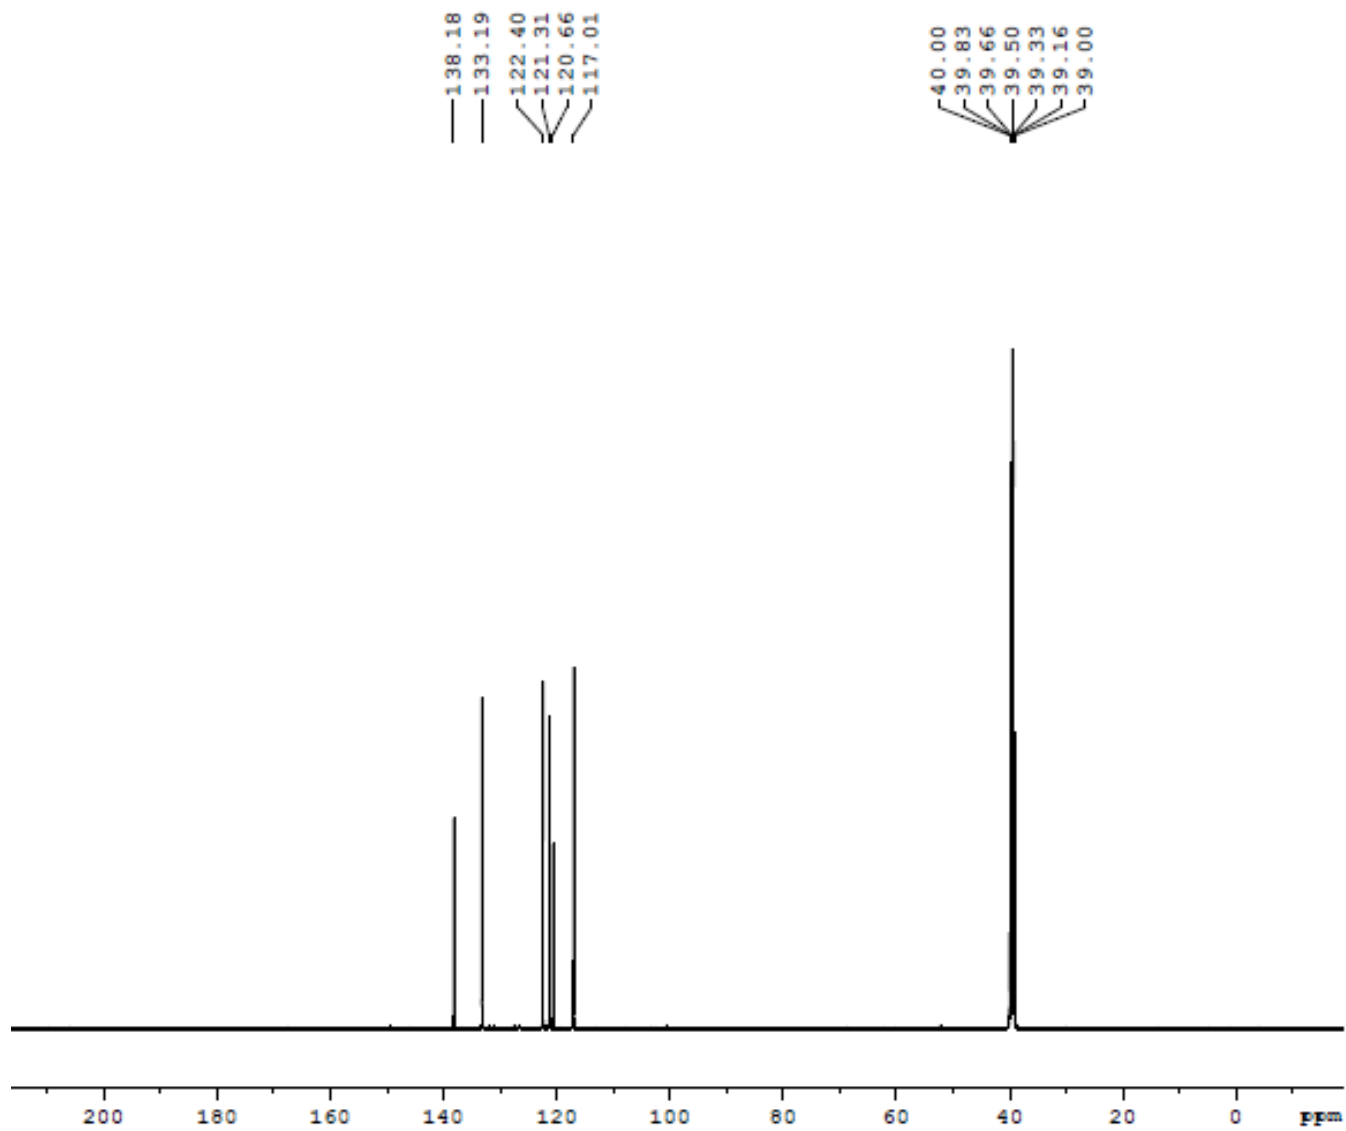

Figure 65: <sup>13</sup>C NMR Spectrum of FOD2 (126 MHz, DMSO-d<sub>6</sub>, 300K)

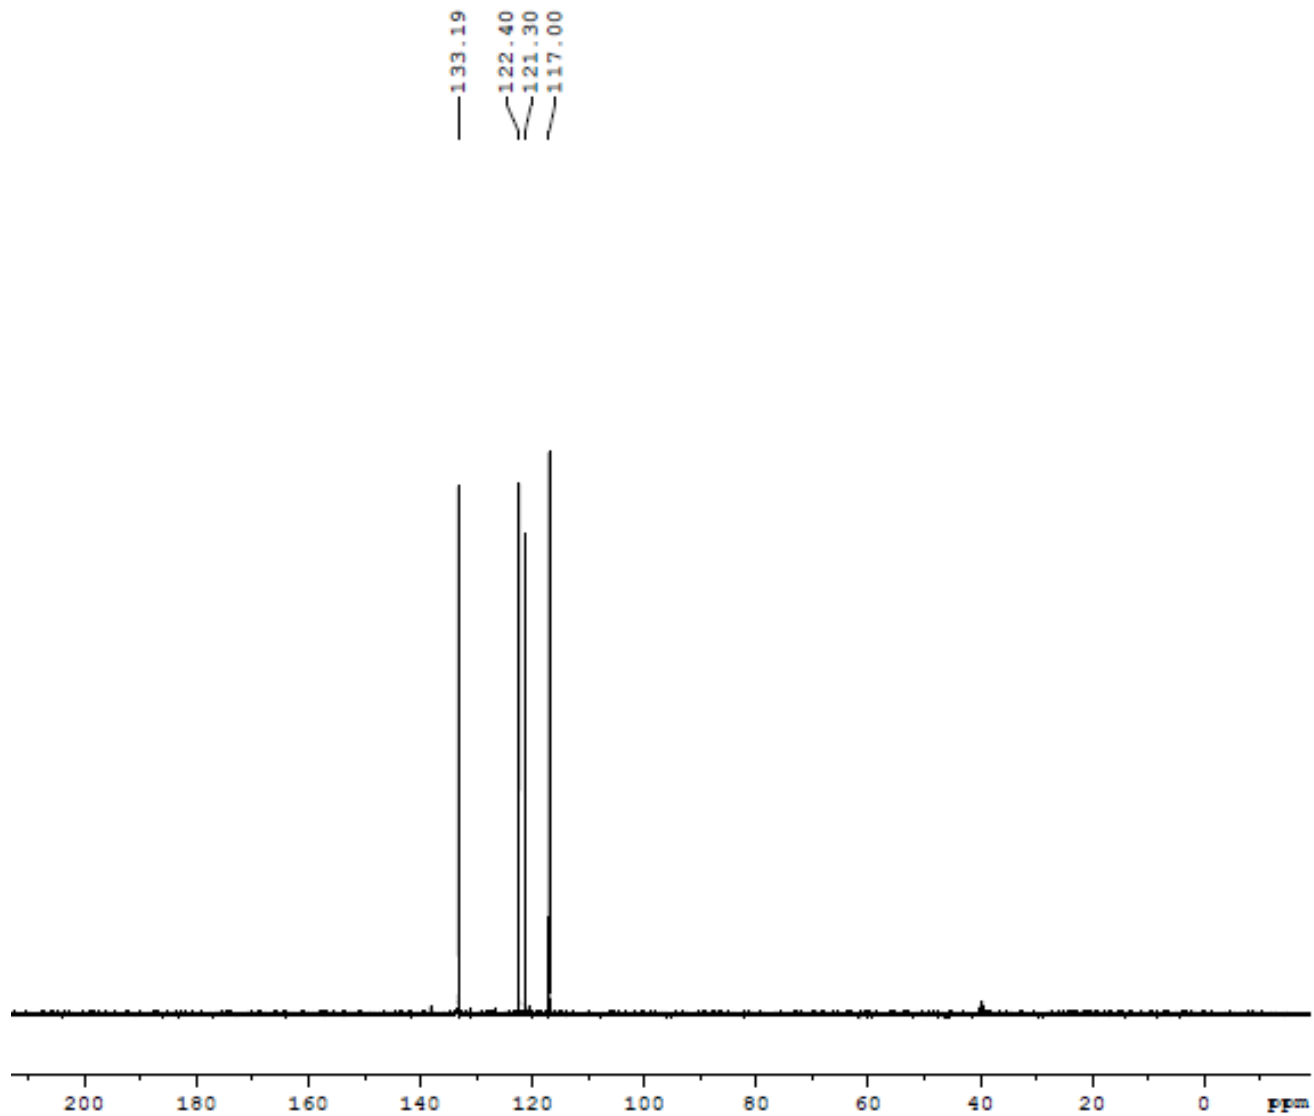

Figure 66: DEPT135 NMR Spectrum of FOD2 (126 MHz, DMSO-d6, 300K)

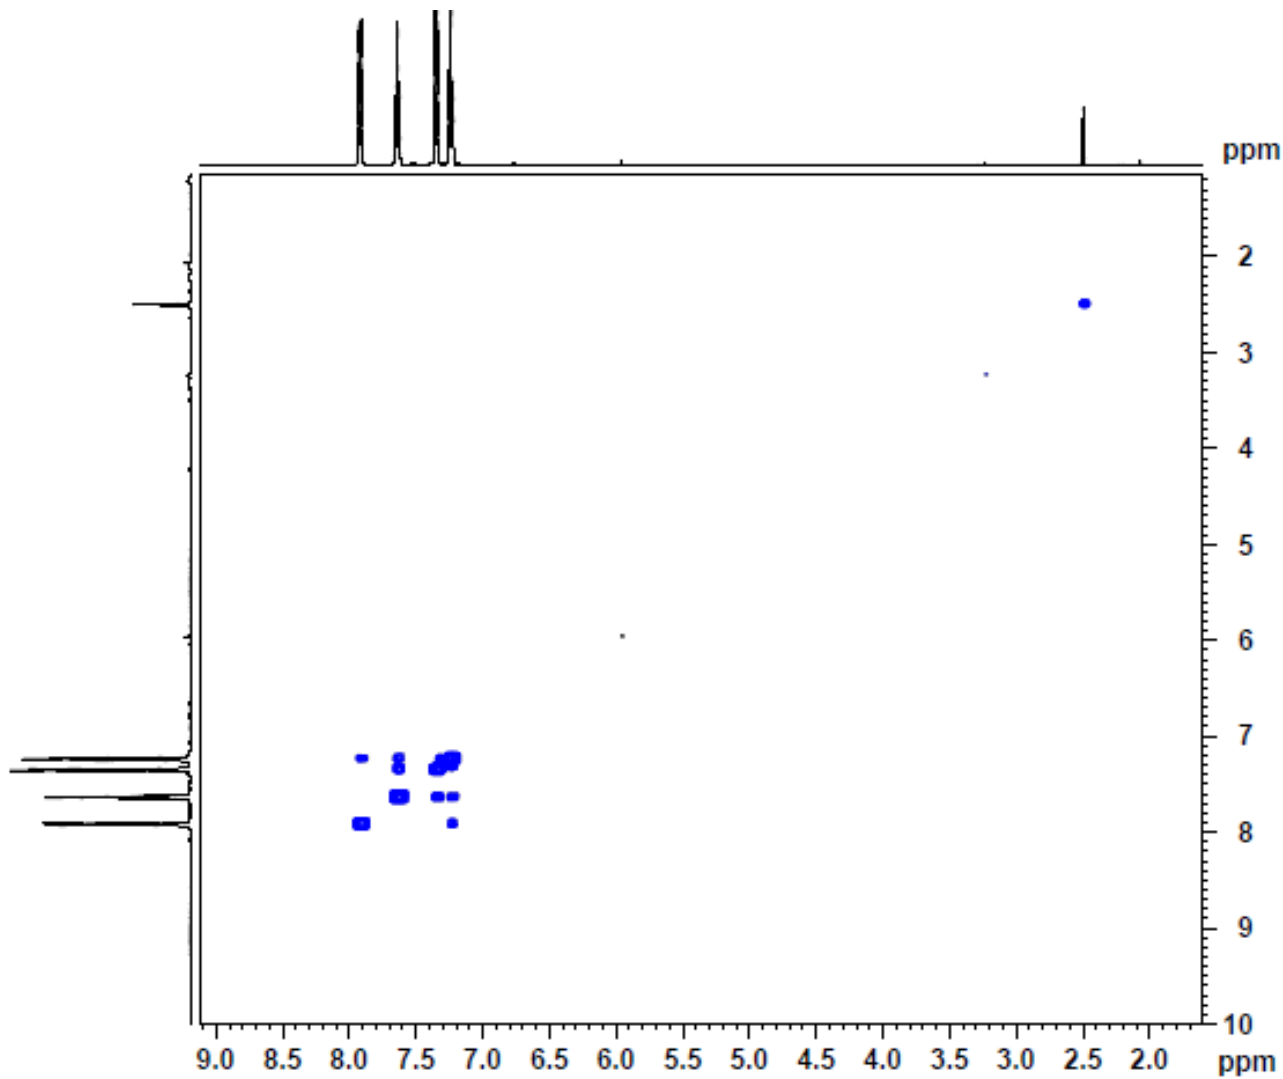

Figure 67: COSY NMR Spectrum of FOD2 (500 MHz, DMSO-d<sub>6</sub>, 300K)

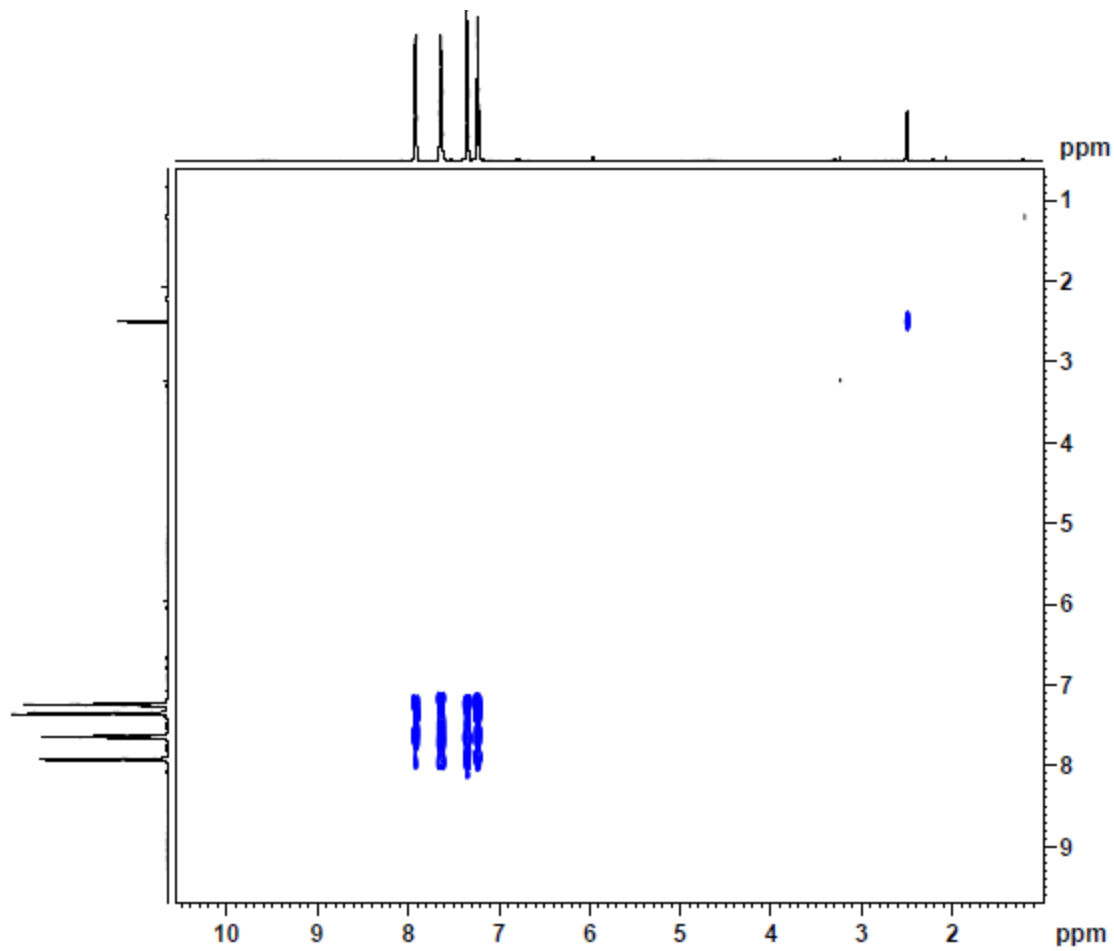

Figure 68: TOCSY NMR Spectrum of FOD2 (500 MHz, DMSO-d<sub>6</sub>, 300K)

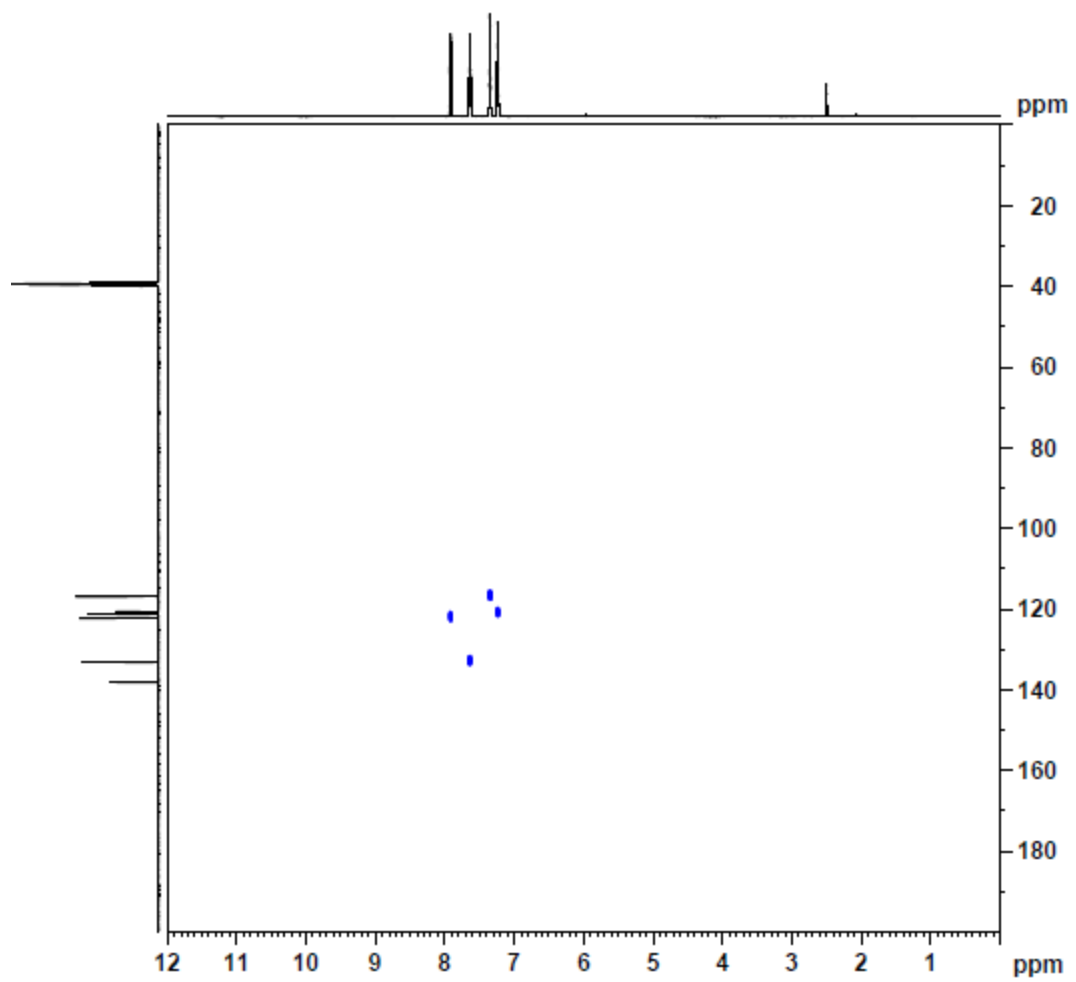

Figure 69: HSQC NMR Spectrum of FOD2 (500 MHz, DMSO-d<sub>6</sub>, 300K)

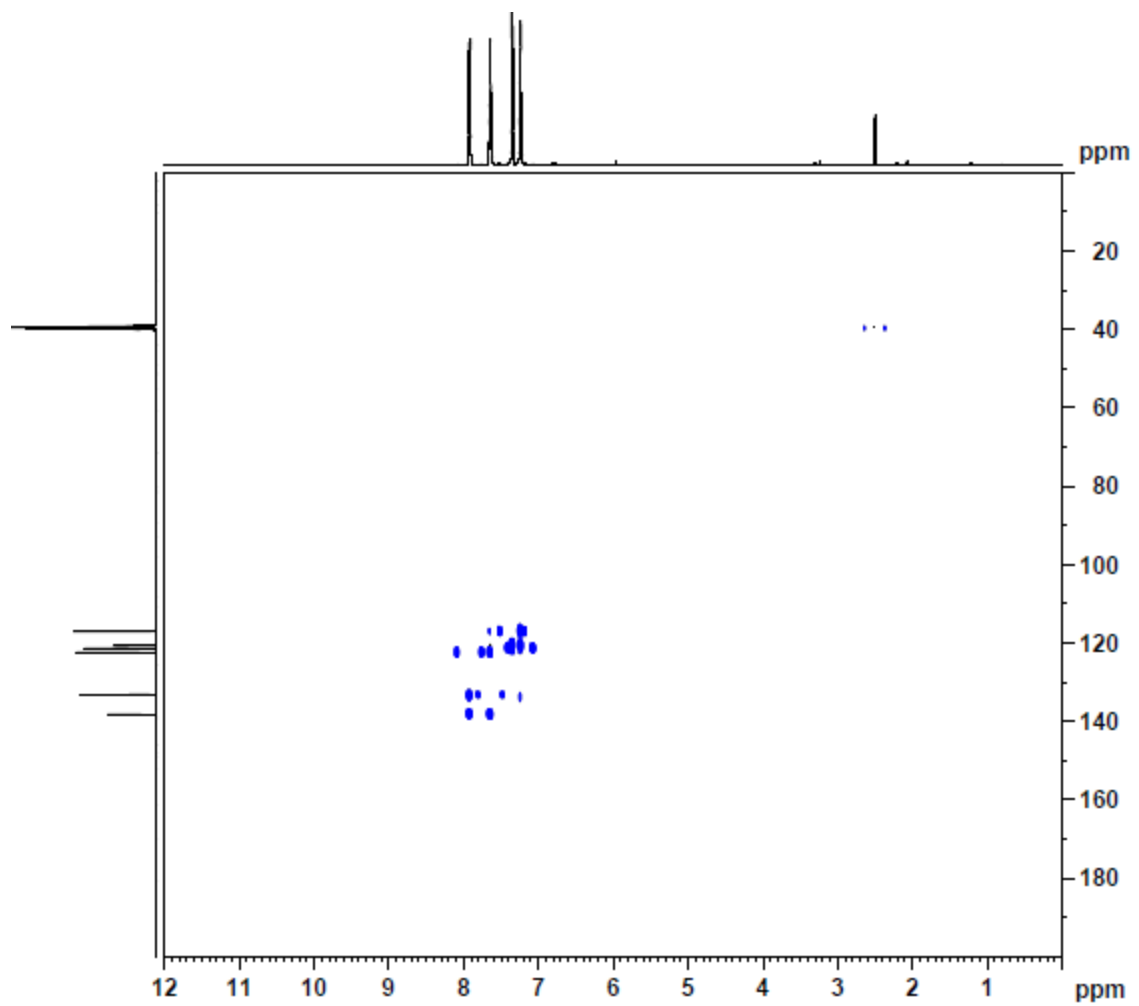

Figure 70: HMBC NMR Spectrum of FOD2 (500 MHz, DMSO-d<sub>6</sub>, 300K)



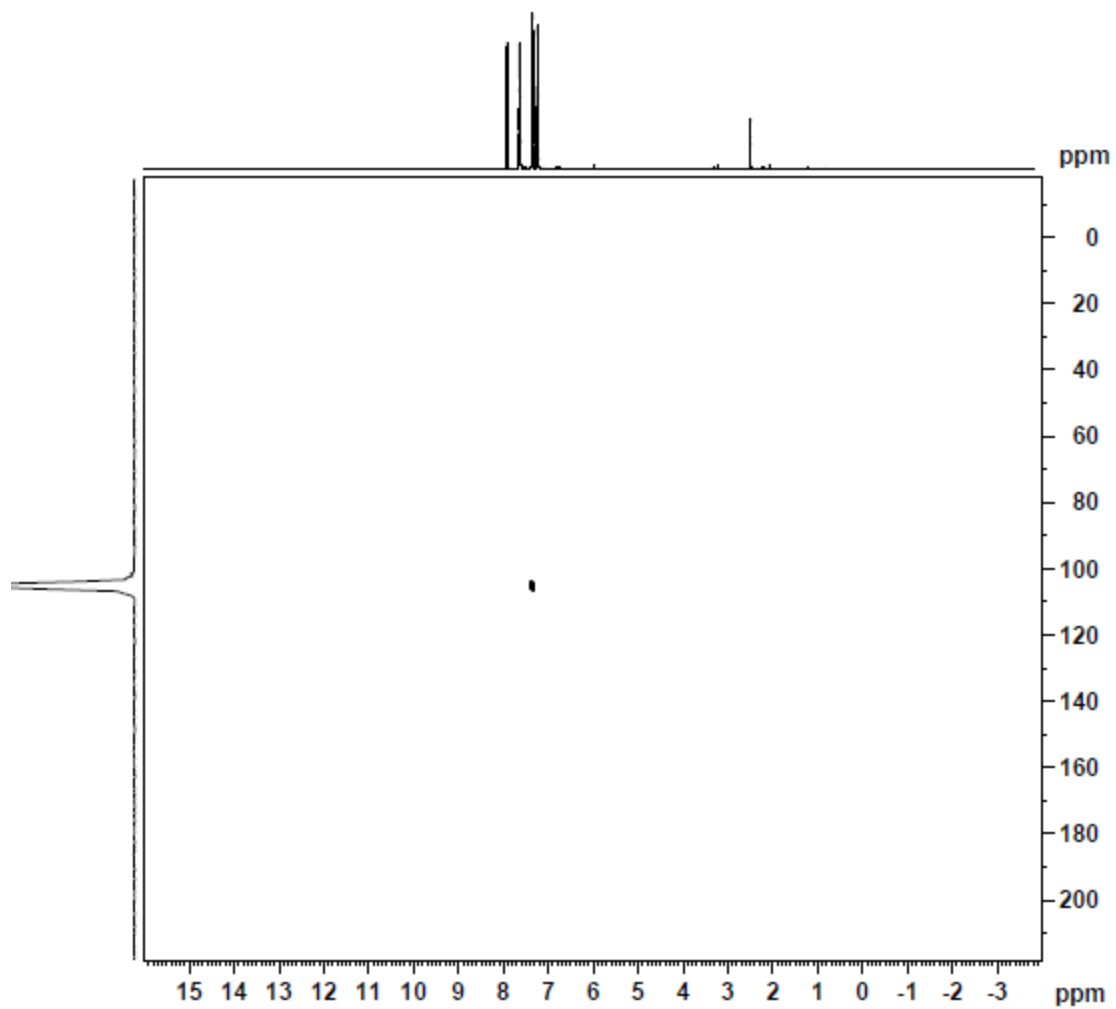

Figure 71:  $^{15}\text{N}$ -HMBC NMR Spectrum of FOD2 (500 MHz, DMSO- $d_6$ , 300K)

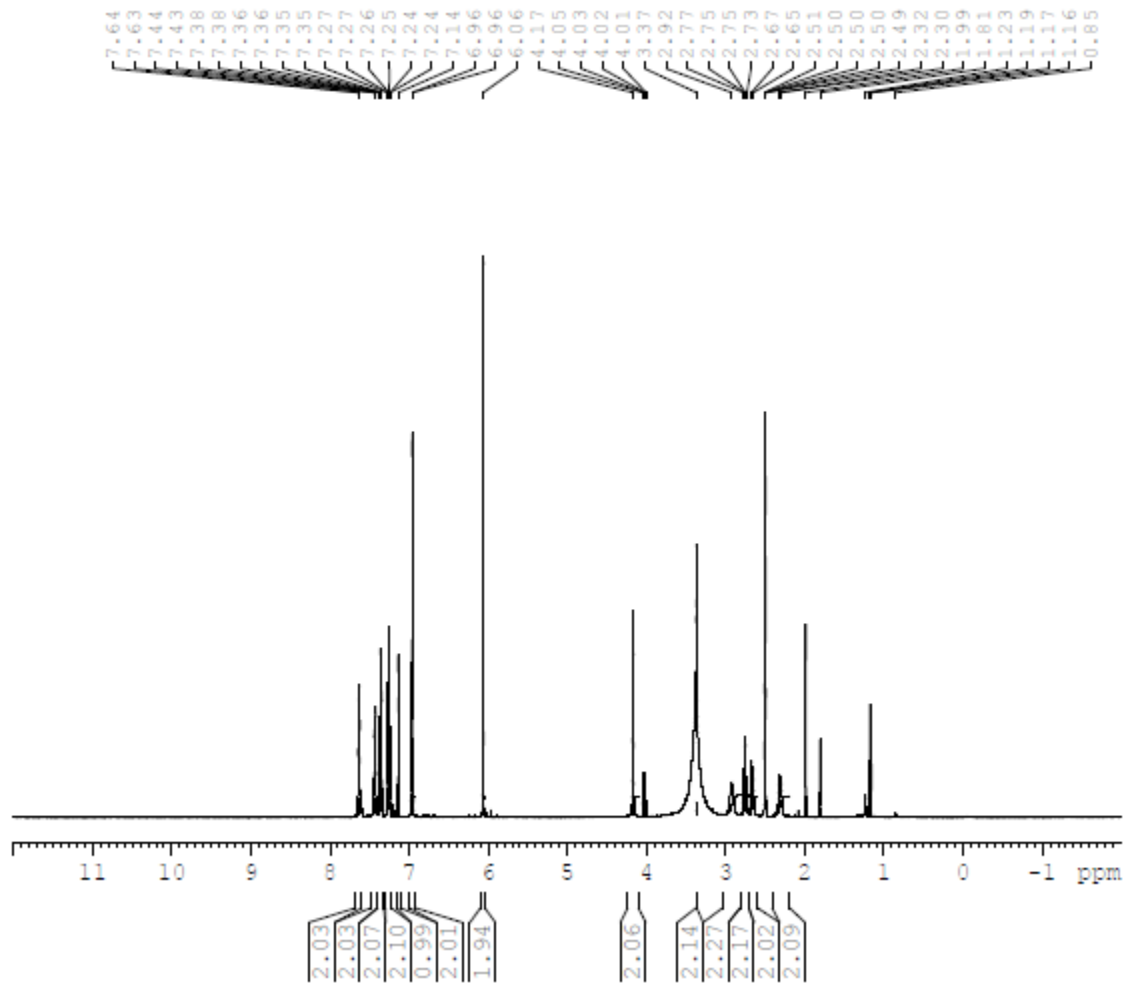

Figure 72:  $^1\text{H}$  NMR Spectrum of FOD3 (500 MHz,  $\text{DMSO-}d_6$ , 300K)

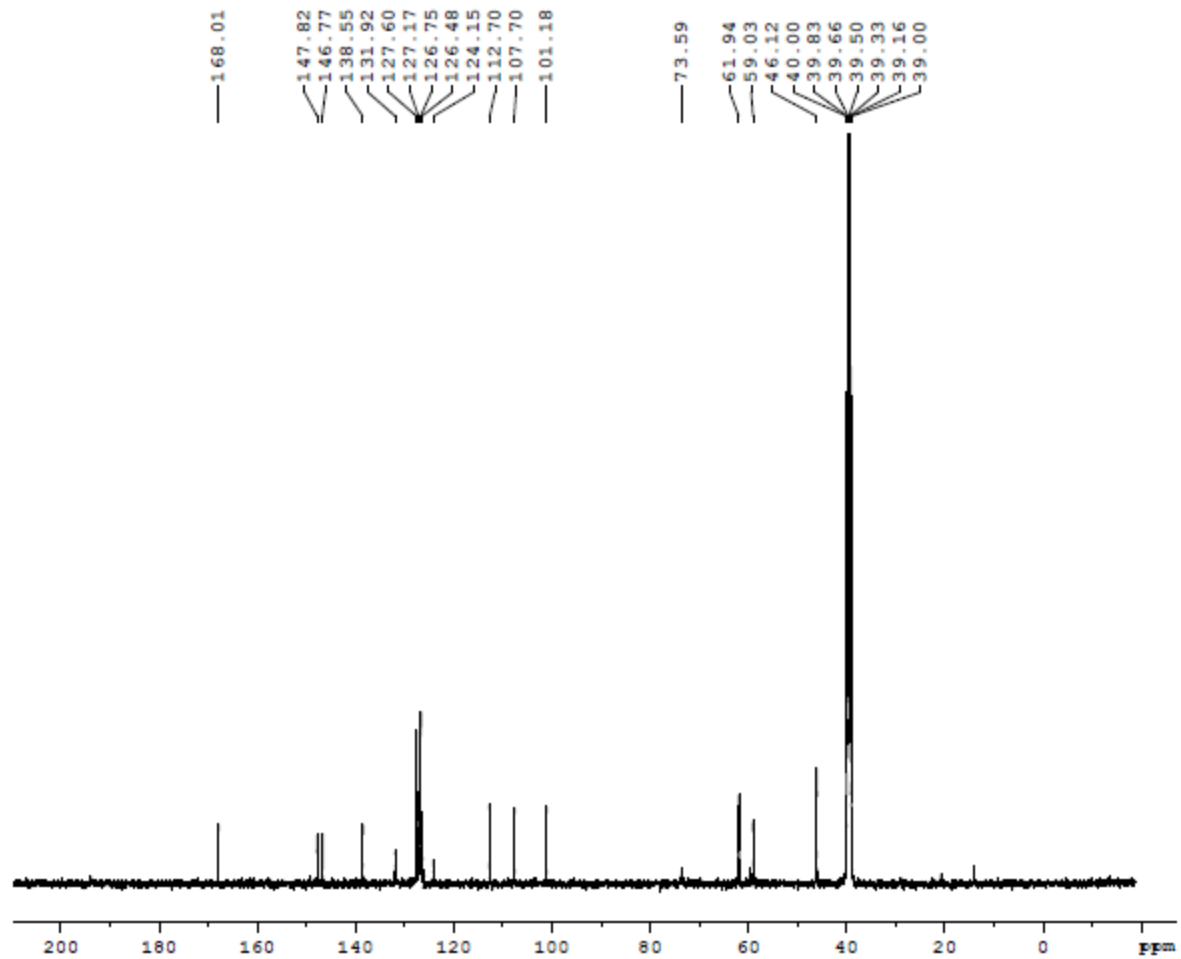

Figure 73:  $^{13}\text{C}$  NMR Spectrum of FOD3 (126 MHz,  $\text{DMSO-d}_6$ , 300K)

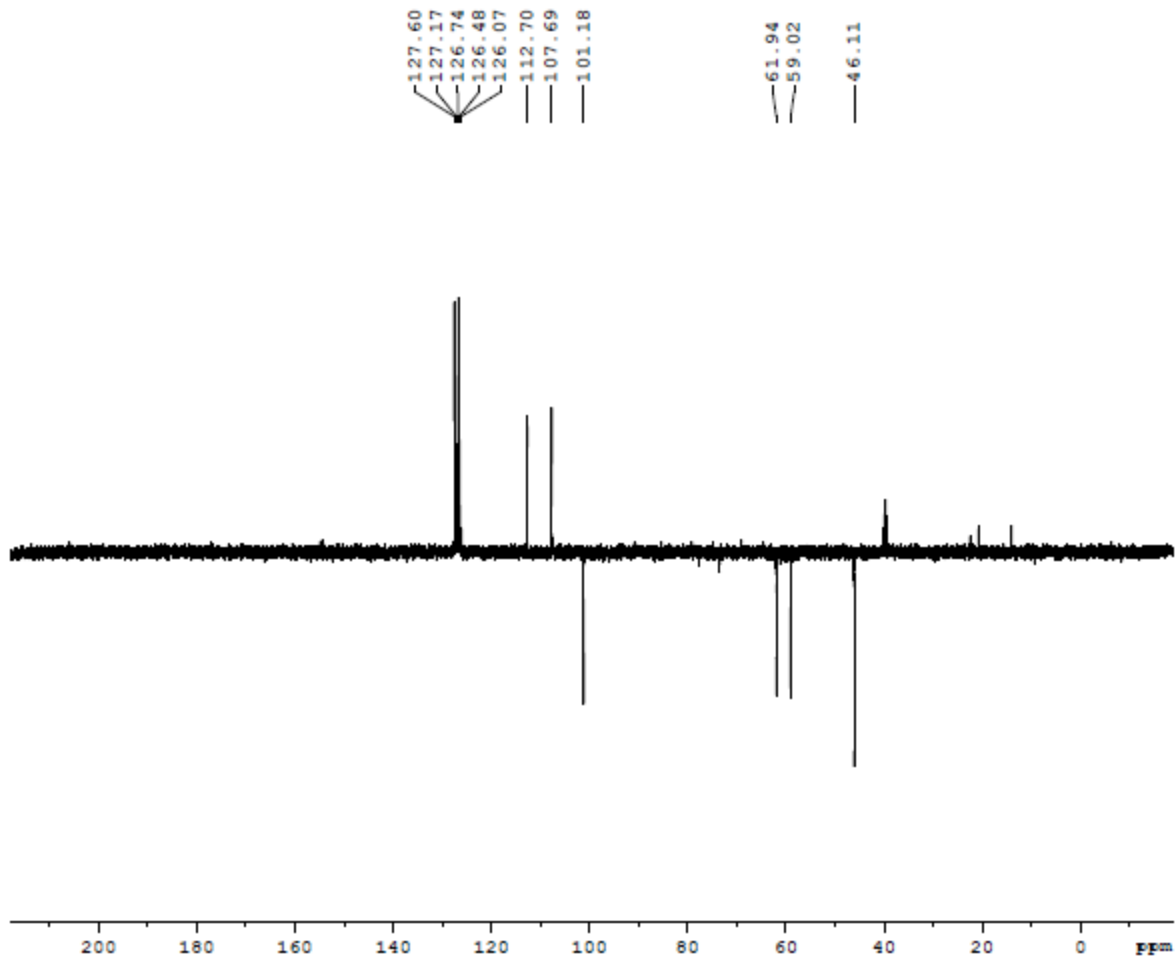

Figure 74: DEPT135 NMR Spectrum of FOD3 (126 MHz, DMSO-d<sub>6</sub>, 300K)

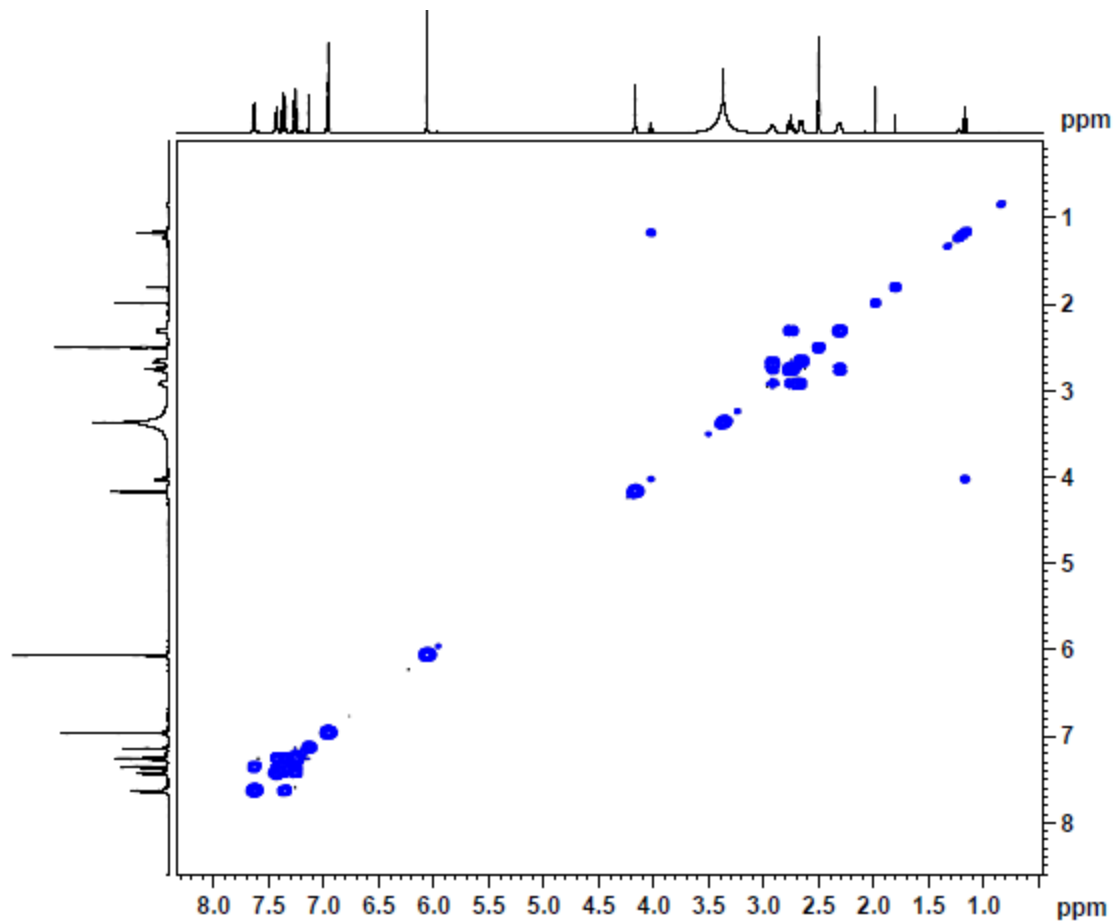

Figure 75: COSY NMR Spectrum of FOD3 (500 MHz, DMSO-d<sub>6</sub>, 300K)

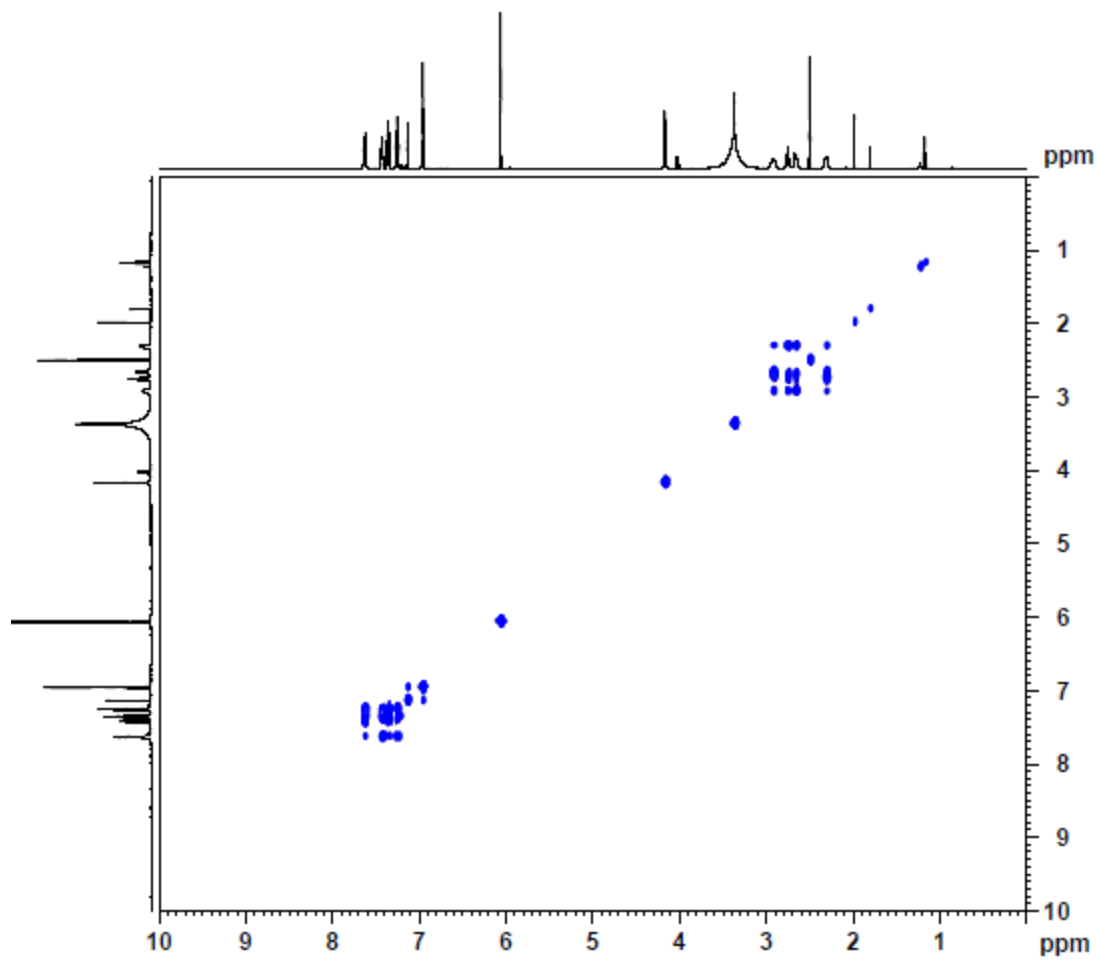

Figure 76: TOCSY NMR Spectrum of FOD3 (500 MHz, DMSO-d<sub>6</sub>, 300K)

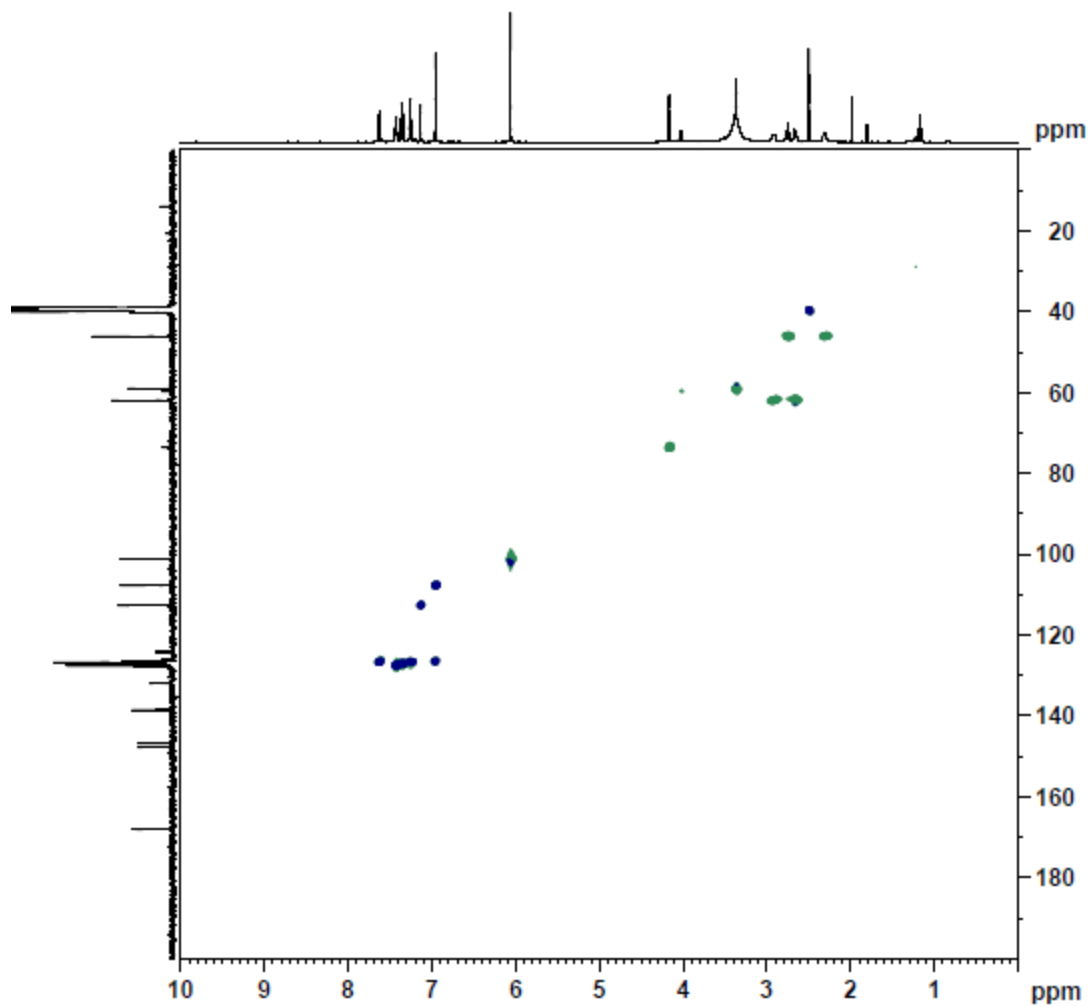

Figure 77: HSQC NMR Spectrum of FOD3 (500 MHz, DMSO-d<sub>6</sub>, 300K)

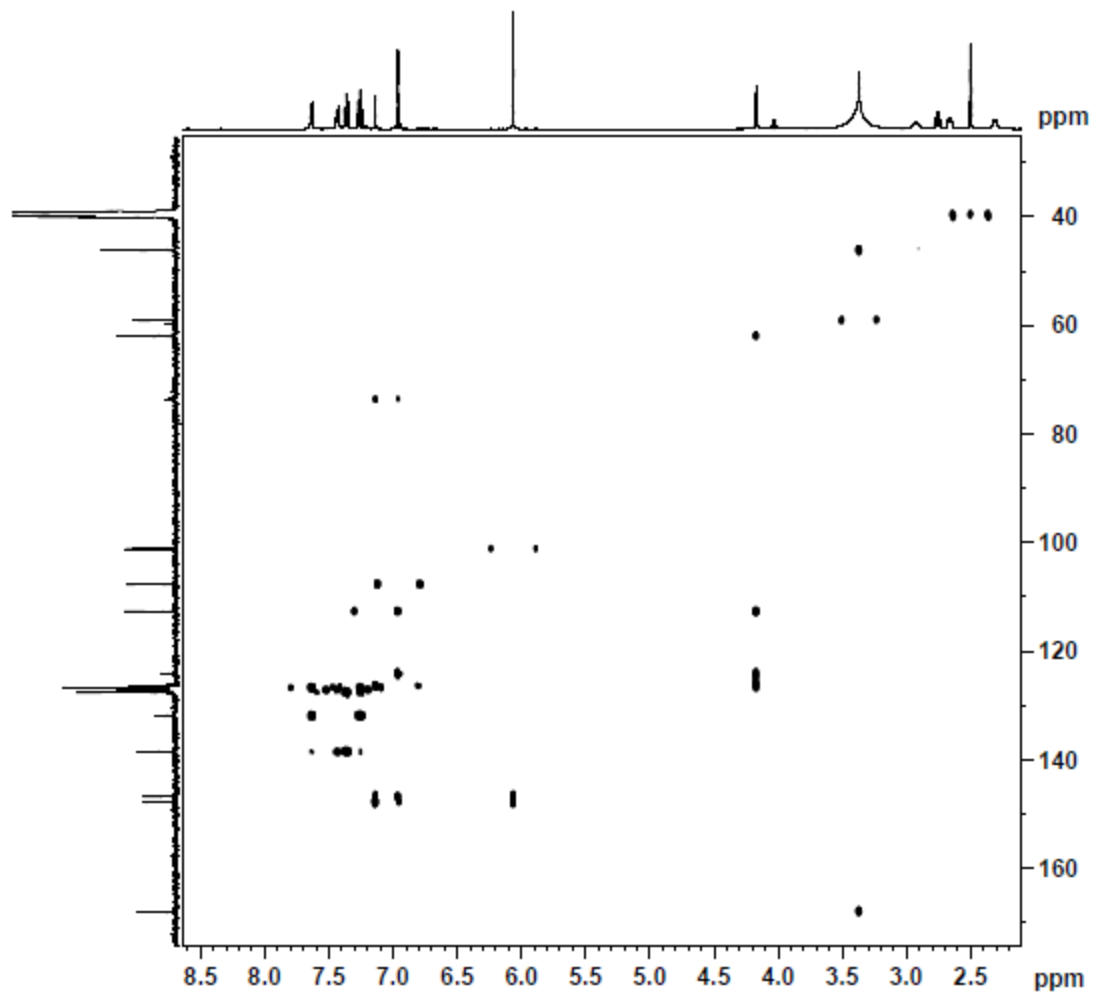

Figure 78: HMBC NMR Spectrum of FOD3 (500 MHz, DMSO-d6, 300K)



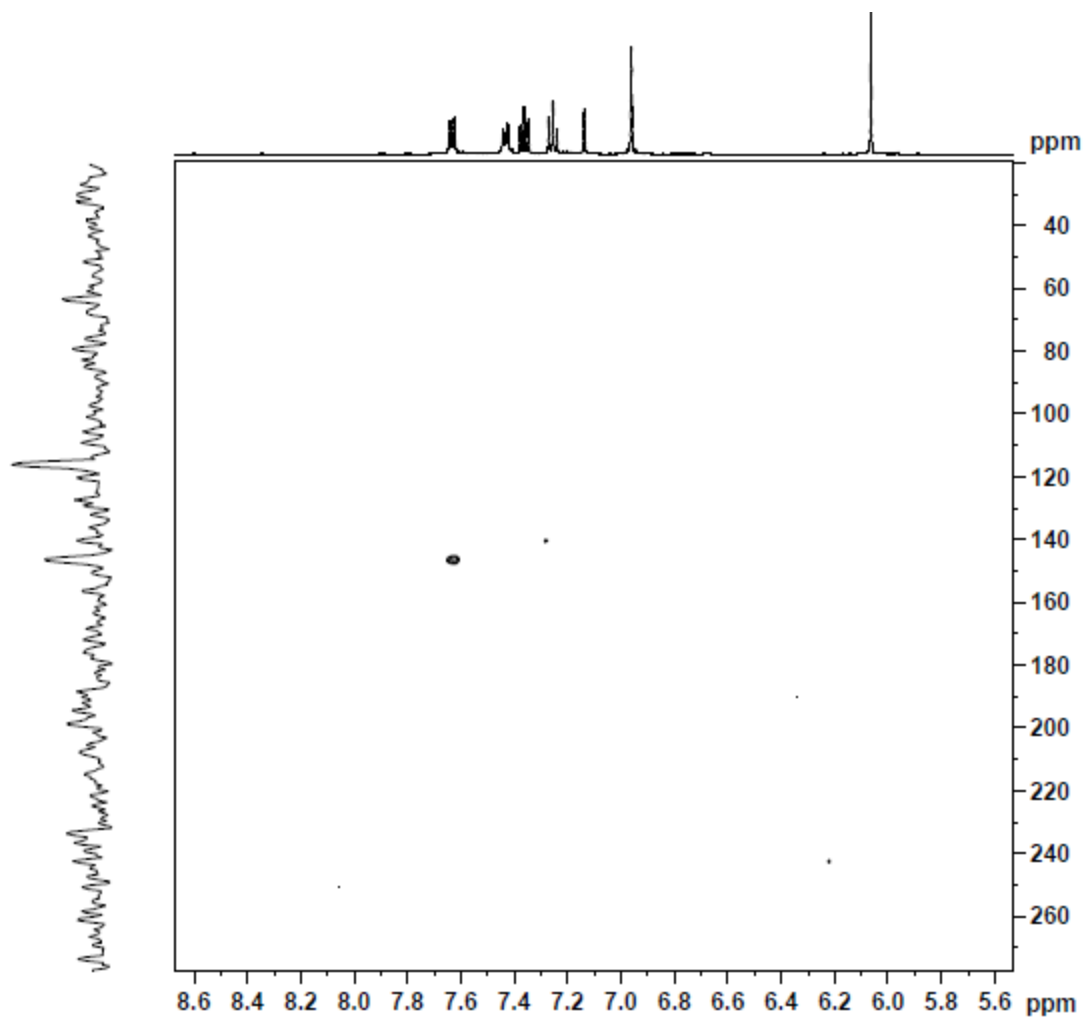

Figure 79:  $^{15}\text{N}$ -HMBC NMR Spectrum of FOD3 (500 MHz, DMSO- $d_6$ , 300K)

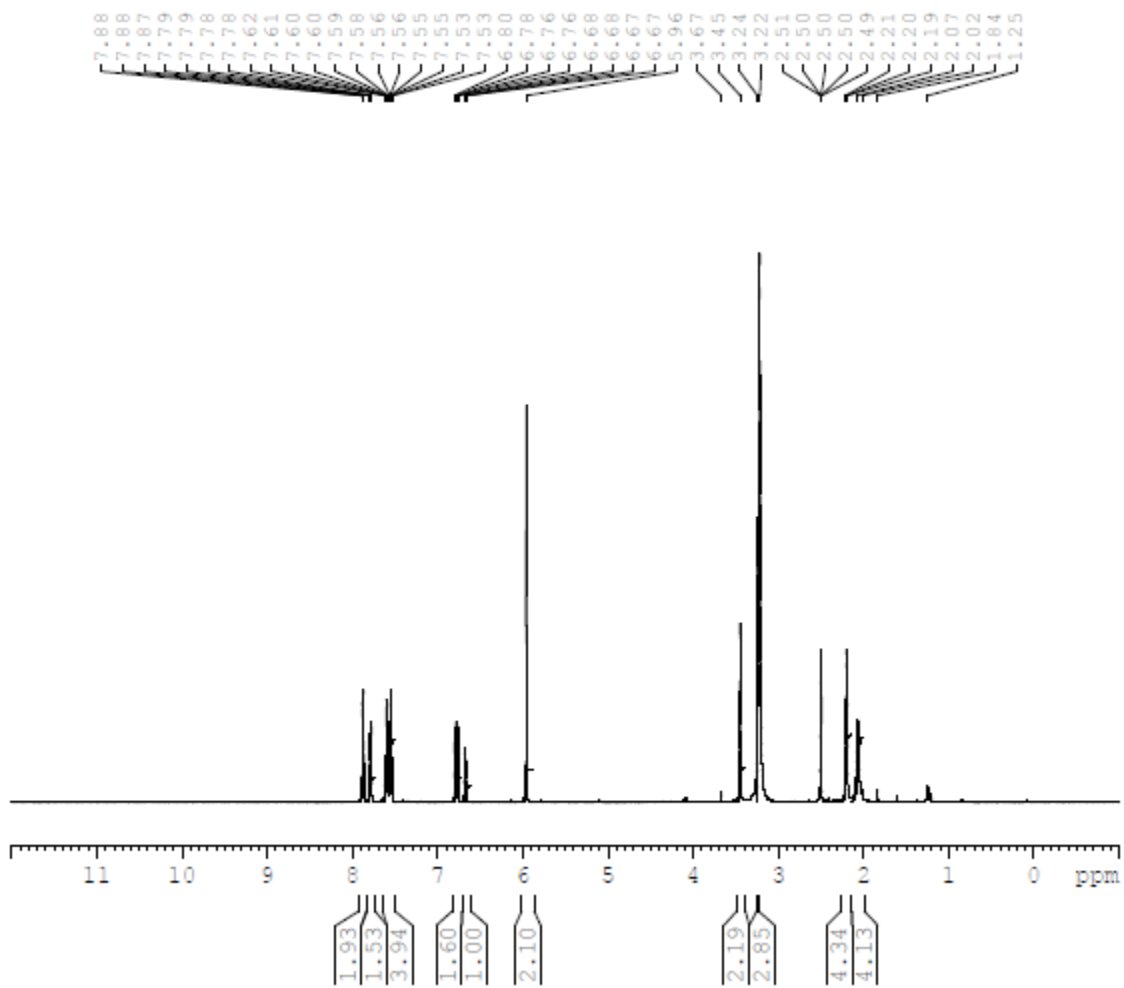

Figure 80: <sup>1</sup>H NMR Spectrum of FOD5 (500 MHz, DMSO-*d*<sub>6</sub>, 300K)

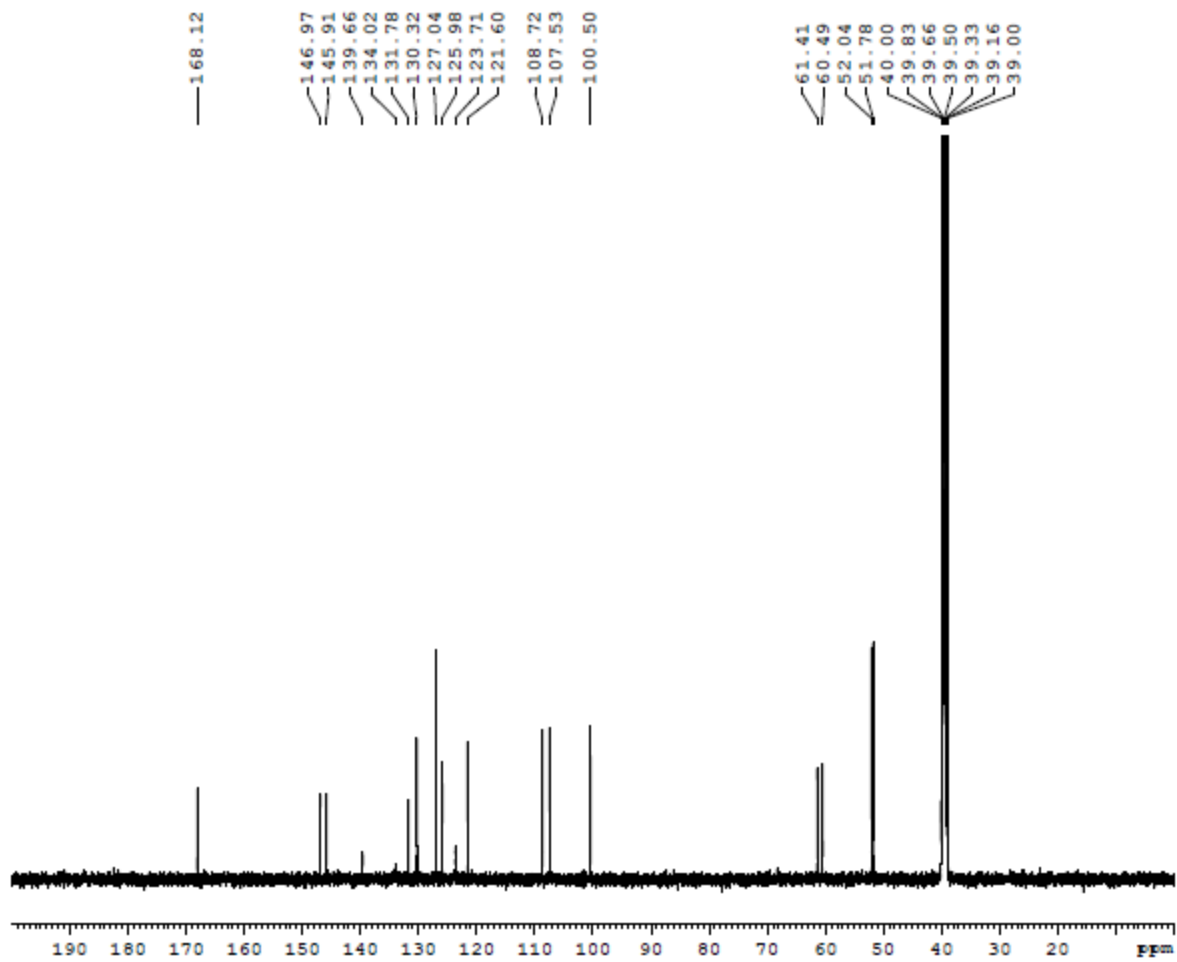

Figure 81:  $^{13}\text{C}$  NMR Spectrum of FOD5 (126 MHz,  $\text{DMSO-d}_6$ , 300K)

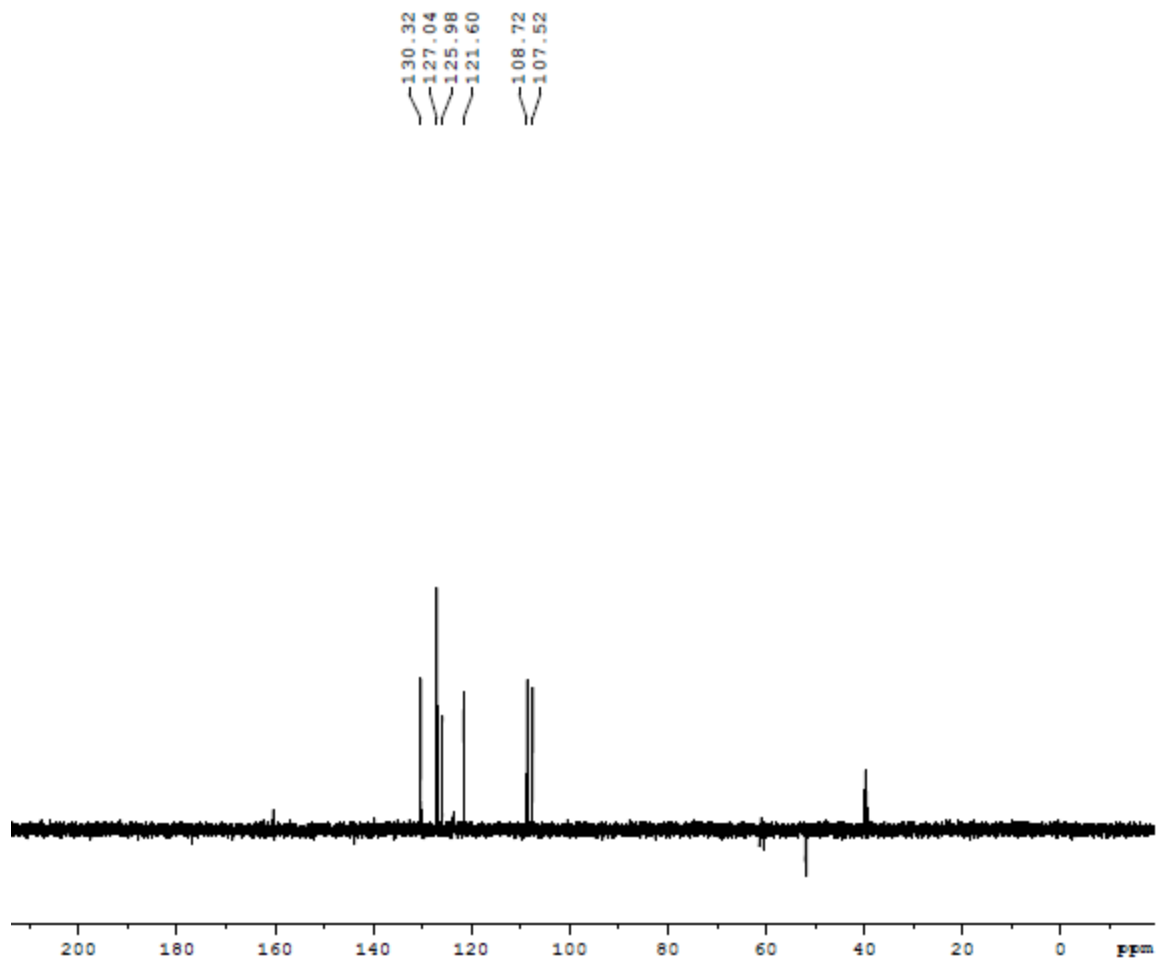

Figure 82: DEPT90 NMR Spectrum of FOD5 (126 MHz, DMSO-d6, 300K)

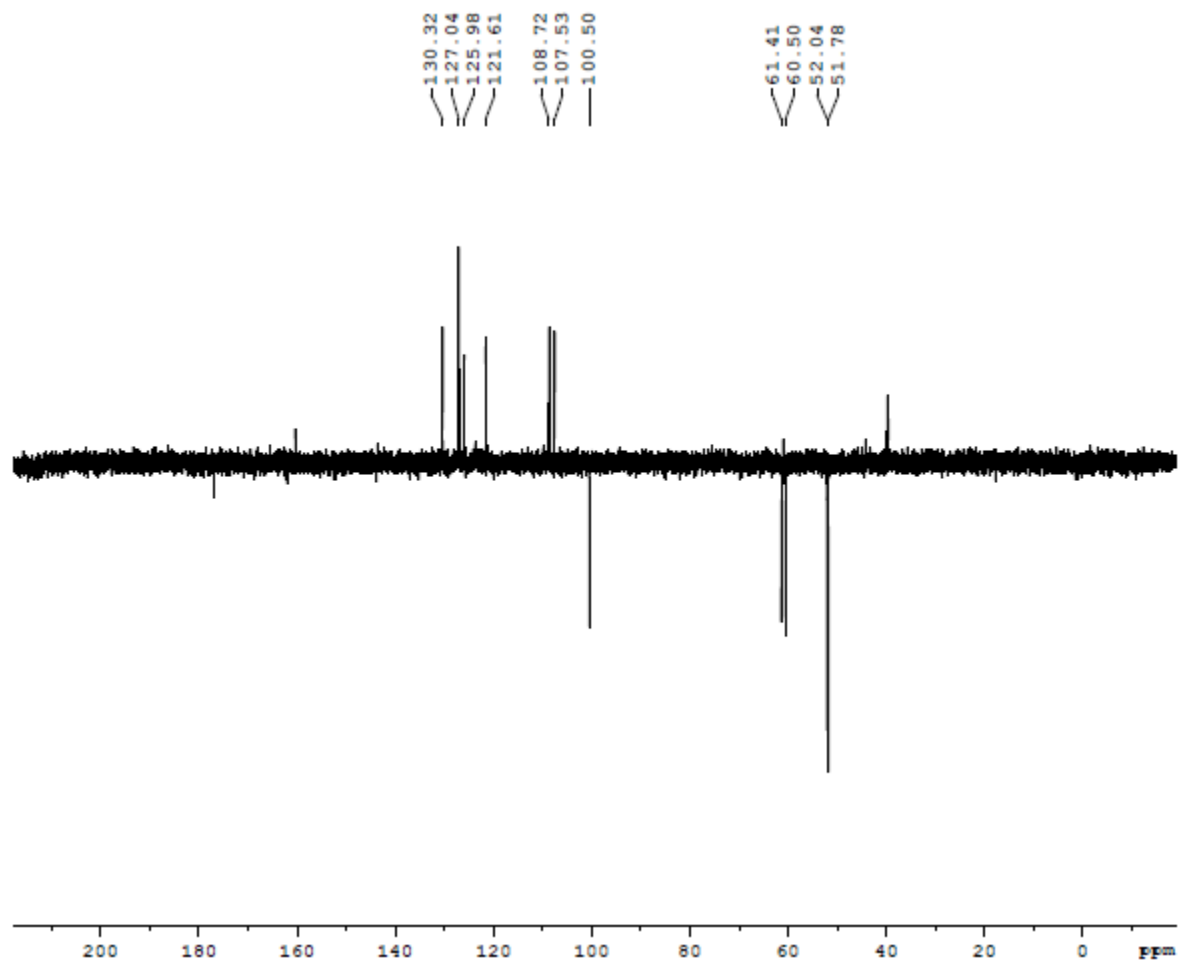

Figure 83: DEPT135 NMR Spectrum of FOD5 (126 MHz, DMSO-d6, 300K)

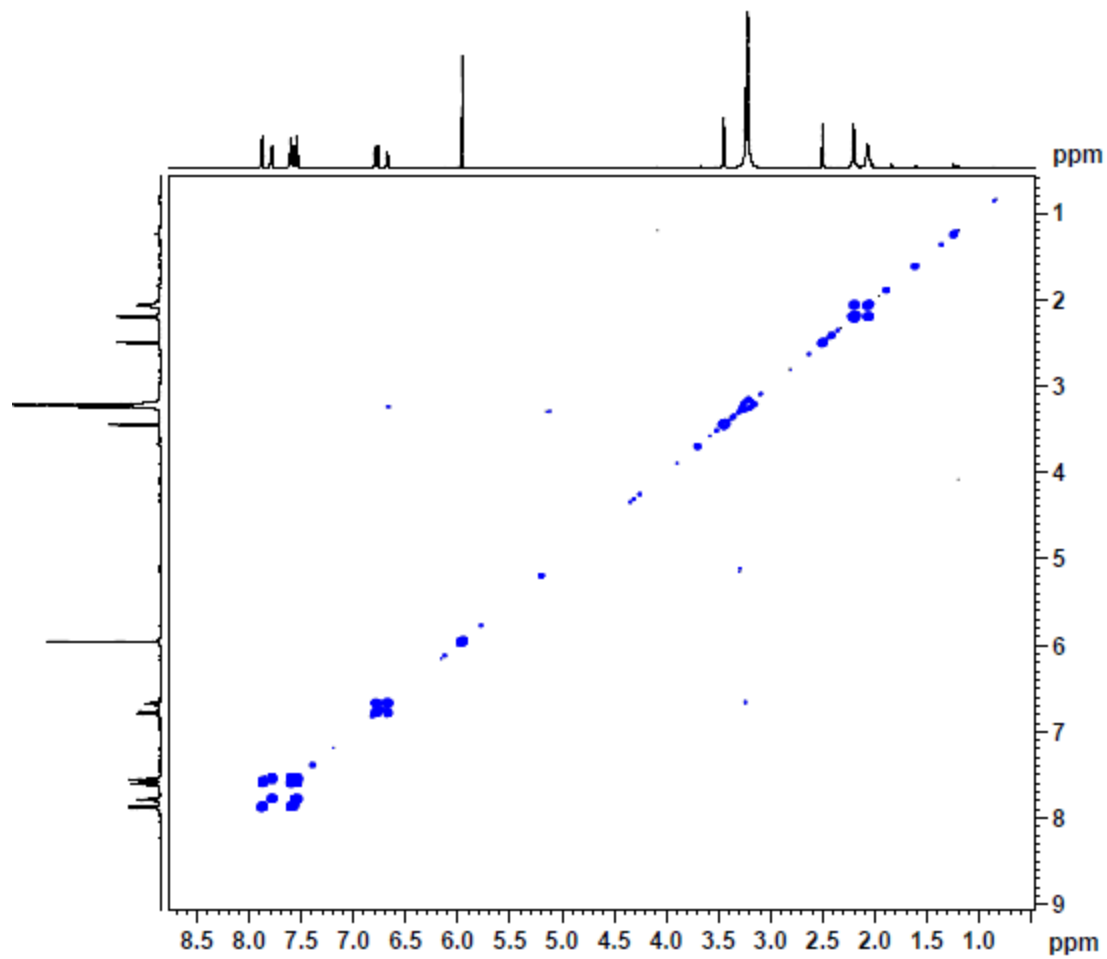

Figure 84: COSY NMR Spectrum of FOD5 (500 MHz, DMSO-d<sub>6</sub>, 300K)

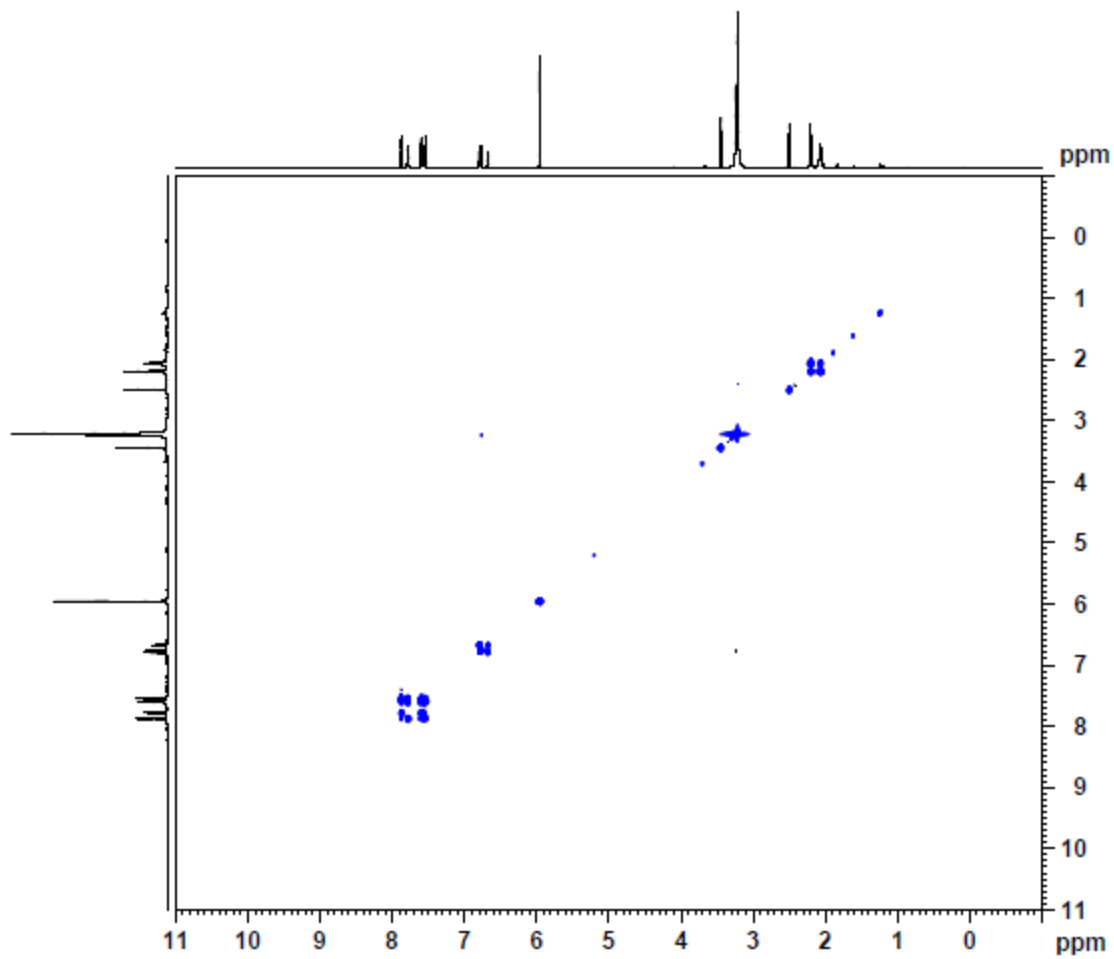

Figure 85: TOCSY NMR Spectrum of FOD5 (500 MHz, DMSO-d6, 300K)

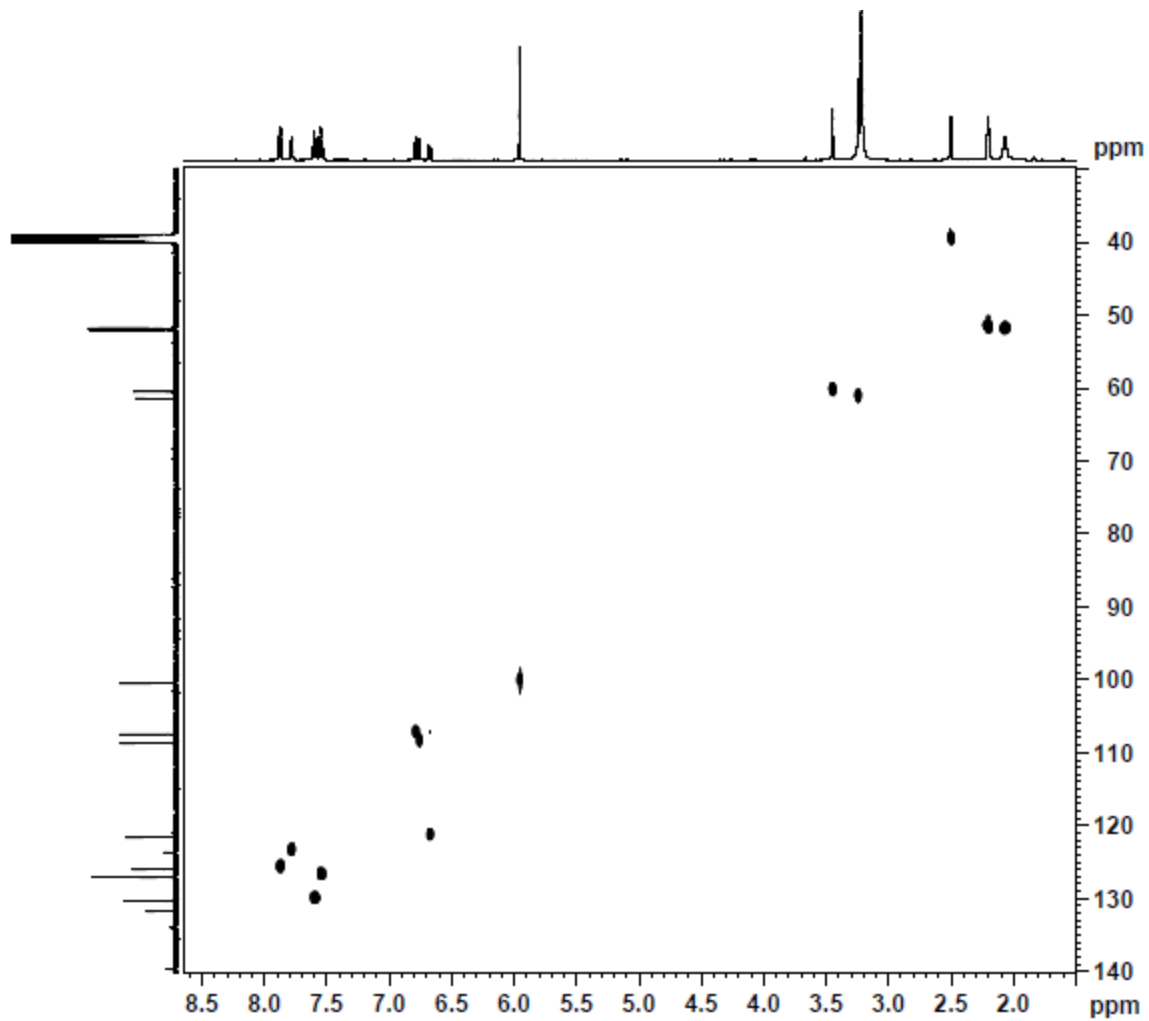

Figure 86: HSQC NMR Spectrum of FOD5 (500 MHz, DMSO-d<sub>6</sub>, 300K)



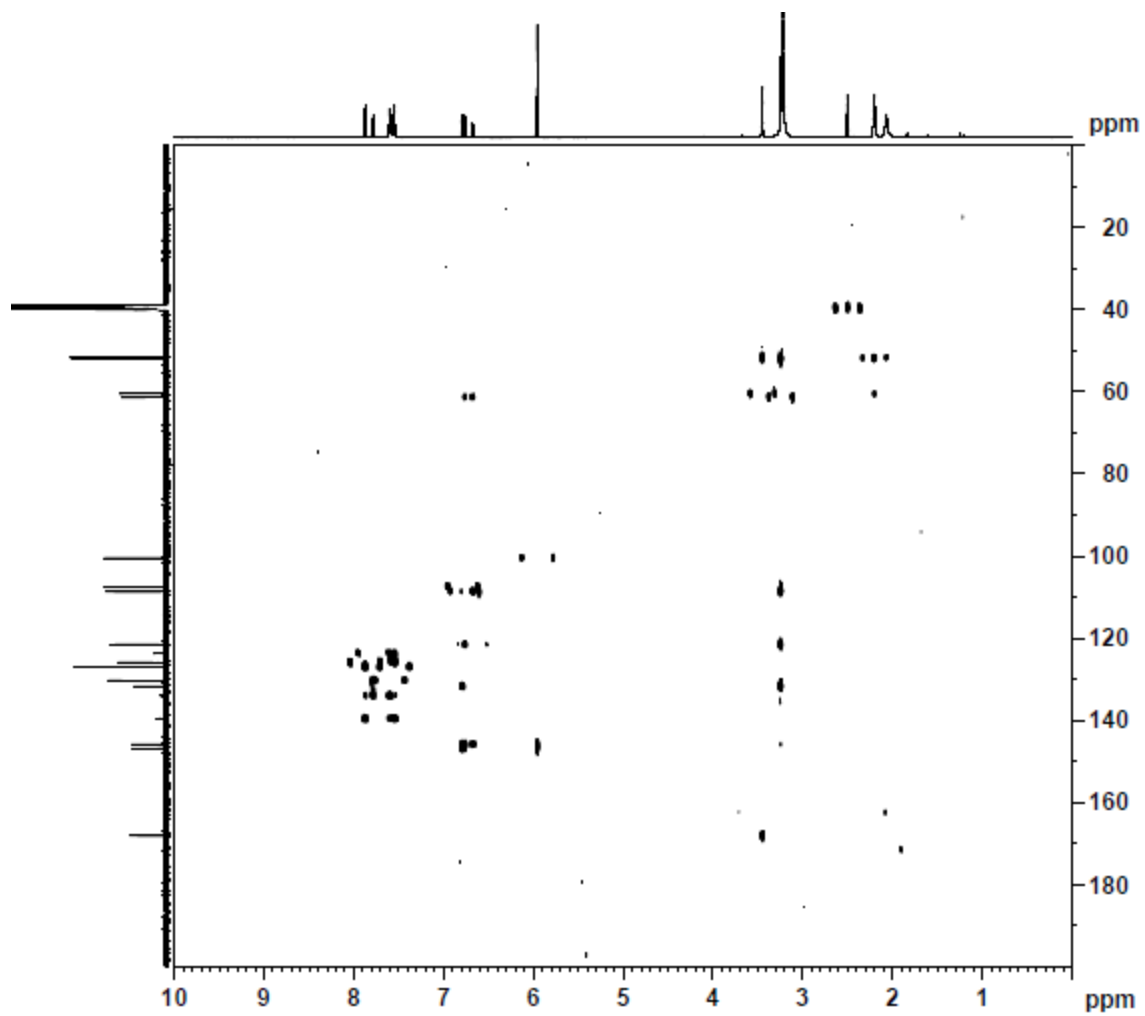

Figure 87: HMBC NMR Spectrum of FOD5 (500 MHz, DMSO-d<sub>6</sub>, 300K)

## Prediction Summary - FEN

**Derek:**     Inactive

**Sarah:**     Negative

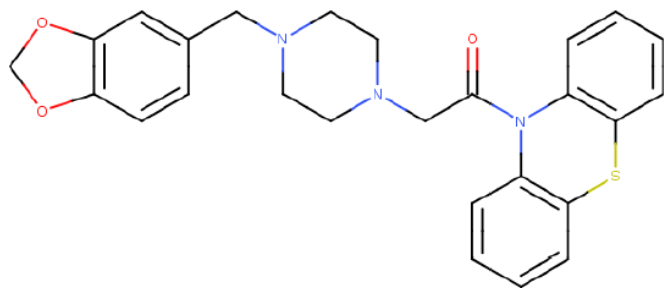

Smiles:

O=C(CN3CCN(CC2=CC=1OCOC=1C=C2)CC3)N5C=CC=CC=C5SC6=CC=CC=C6

|                          |          |
|--------------------------|----------|
| <b>Average Mol Mass:</b> | 459.56   |
| <b>Exact Mol Mass:</b>   | 459.1617 |
| <b>Log Kp:</b>           | -1.99    |
| <b>Log P:</b>            | 4.97     |

Figure 88: In-silico prediction report for FEN

## ACD/MS Fragmenter data

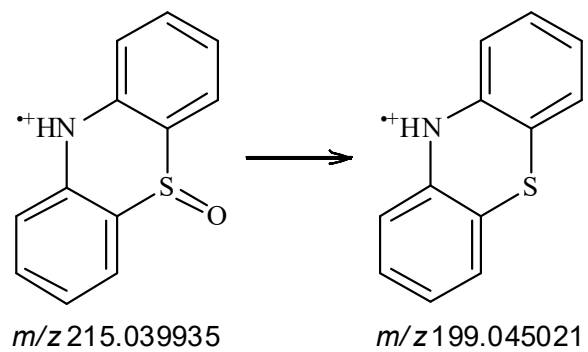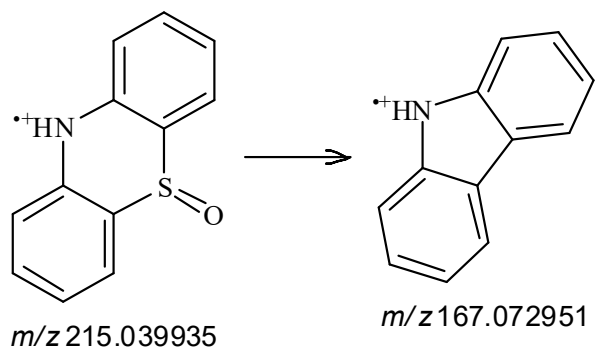

Figure 89: Fragment structures of FOD1 by ACD-MS Fragmentor

### ACD/MS Fragmenter data

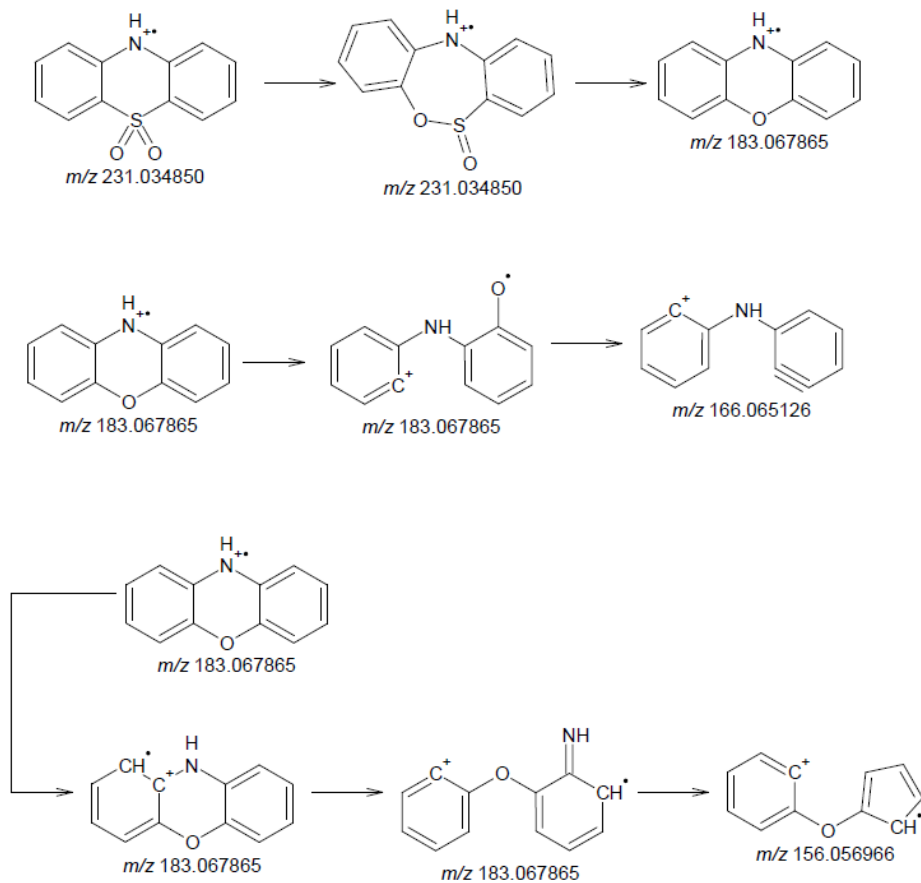

Figure 90: Fragment structures of FOD2 by ACD-MS Fragmentor

**Table S-1:** HRMS fragmentation data of Fenoverine (FEN) and its degradation products FAD1, FAD2, FOD1 to FOD5.

|                         | HRMS data     |                                  |                                                                              |                      |              |
|-------------------------|---------------|----------------------------------|------------------------------------------------------------------------------|----------------------|--------------|
|                         | Accurate mass | Obtained m/z values of fragments | Proposed chemical formula                                                    | Calculated m/z value | Error in ppm |
| [FEN + H] <sup>+</sup>  | 460.1706      | 324.1154                         | C <sub>18</sub> H <sub>18</sub> N <sub>3</sub> OS <sup>+</sup>               | 324.1165             | -3.4         |
|                         |               | 233.1317                         | C <sub>13</sub> H <sub>17</sub> N <sub>2</sub> O <sub>2</sub> <sup>+</sup>   | 233.1285             | 13.7         |
|                         |               | 135.0436                         | C <sub>8</sub> H <sub>7</sub> O <sub>2</sub> <sup>+</sup>                    | 135.0441             | -3.7         |
| [FAD1 + H] <sup>+</sup> | 279.1328      | 143.0862                         | C <sub>6</sub> H <sub>11</sub> N <sub>2</sub> O <sub>2</sub> <sup>+</sup>    | 143.0815             | 32.8         |
|                         |               | 135.0451                         | C <sub>8</sub> H <sub>7</sub> O <sub>2</sub> <sup>+</sup>                    | 135.0441             | 7.4          |
|                         |               | 105.0360                         | C <sub>7</sub> H <sub>5</sub> O <sup>+</sup>                                 | 105.0335             | 23.8         |
|                         |               | 79.0527                          | C <sub>6</sub> H <sub>7</sub> <sup>+</sup>                                   | 79.0542              | -19.0        |
|                         |               | 77.0382                          | C <sub>6</sub> H <sub>5</sub> <sup>+</sup>                                   | 77.0386              | -5.2         |
| [FOD1 + H] <sup>+</sup> | 216.0464      | 199.0452                         | C <sub>12</sub> H <sub>9</sub> NS <sup>+</sup>                               | 199.0450             | 1.0          |
|                         |               | 167.0748                         | C <sub>12</sub> H <sub>9</sub> N <sup>+</sup>                                | 167.0730             | 10.8         |
|                         |               | 154.0683                         | C <sub>11</sub> H <sub>8</sub> N <sup>+</sup>                                | 154.0651             | 20.8         |
| [FOD2 + H] <sup>+</sup> | 232.0412      | 215.0402                         | C <sub>12</sub> H <sub>9</sub> NOS <sup>+</sup>                              | 215.0399             | 1.4          |
|                         |               | 183.0708                         | C <sub>12</sub> H <sub>9</sub> NO <sup>+</sup>                               | 183.0679             | 15.8         |
|                         |               | 167.0748                         | C <sub>12</sub> H <sub>9</sub> N <sup>+</sup>                                | 167.0730             | 10.8         |
|                         |               | 156.0812                         | C <sub>11</sub> H <sub>10</sub> N <sup>+</sup>                               | 156.0808             | 2.6          |
|                         |               | 129.0699                         | C <sub>10</sub> H <sub>9</sub> <sup>+</sup>                                  | 129.0699             | 0.0          |
| [FOD3 + H] <sup>+</sup> | 476.1638      | 340.1088                         | C <sub>18</sub> H <sub>18</sub> N <sub>3</sub> O <sub>2</sub> S <sup>+</sup> | 340.1114             | -7.6         |
|                         |               | 322.1051                         | C <sub>18</sub> H <sub>16</sub> N <sub>3</sub> OS <sup>+</sup>               | 322.1009             | 13.0         |
|                         |               | 200.0573                         | C <sub>12</sub> H <sub>10</sub> NS <sup>+</sup>                              | 200.0528             | 22.5         |
|                         |               | 135.0436                         | C <sub>8</sub> H <sub>7</sub> O <sub>2</sub> <sup>+</sup>                    | 135.0441             | -3.7         |
| [FOD4 + H] <sup>+</sup> | 476.1640      | 458.1575                         | C <sub>26</sub> H <sub>24</sub> N <sub>3</sub> O <sub>3</sub> S <sup>+</sup> | 458.1533             | 9.2          |
|                         |               | 323.1085                         | C <sub>18</sub> H <sub>17</sub> N <sub>3</sub> OS <sup>+</sup>               | 323.1087             | -0.6         |
|                         |               | 233.1307                         | C <sub>13</sub> H <sub>17</sub> N <sub>2</sub> O <sub>2</sub> <sup>+</sup>   | 233.1285             | 9.4          |
|                         |               | 198.0346                         | C <sub>12</sub> H <sub>8</sub> NS <sup>+</sup>                               | 198.0372             | -13.1        |
|                         |               | 135.0426                         | C <sub>8</sub> H <sub>7</sub> O <sub>2</sub> <sup>+</sup>                    | 135.0441             | -11.1        |
| [FOD5 + H] <sup>+</sup> | 476.1631      | 340.1088                         | C <sub>18</sub> H <sub>18</sub> N <sub>3</sub> O <sub>2</sub> S <sup>+</sup> | 340.1114             | -7.6         |
|                         |               | 323.1095                         | C <sub>18</sub> H <sub>17</sub> N <sub>3</sub> OS <sup>+</sup>               | 323.1087             | 2.5          |
|                         |               | 233.1250                         | C <sub>13</sub> H <sub>17</sub> N <sub>2</sub> O <sub>2</sub> <sup>+</sup>   | 233.1285             | -15.0        |
|                         |               | 216.0471                         | C <sub>12</sub> H <sub>10</sub> NOS <sup>+</sup>                             | 216.0478             | -3.2         |
|                         |               | 198.0356                         | C <sub>12</sub> H <sub>8</sub> NS <sup>+</sup>                               | 198.0372             | -8.1         |
|                         |               | 135.0436                         | C <sub>8</sub> H <sub>7</sub> O <sub>2</sub> <sup>+</sup>                    | 135.0441             | -3.7         |
| [FAD2] <sup>+</sup>     | 199.0452      | 167.0748                         | C <sub>12</sub> H <sub>9</sub> N <sup>+</sup>                                | 167.0730             | 10.8         |
|                         |               | 154.0629                         | C <sub>11</sub> H <sub>8</sub> N <sup>+</sup>                                | 154.0651             | -14.3        |
